# Supplementary material for: Insights from a Computational-Based Approach for Analyzing Autophagy Genes across Human Cancers
Source: MDPI journal article supplement (doi:10.3390/genes14081550), 2023-07-28
Supplement: s1 [file s1]

## AUTOPHAGY-RELATED GENES IN CANCERS

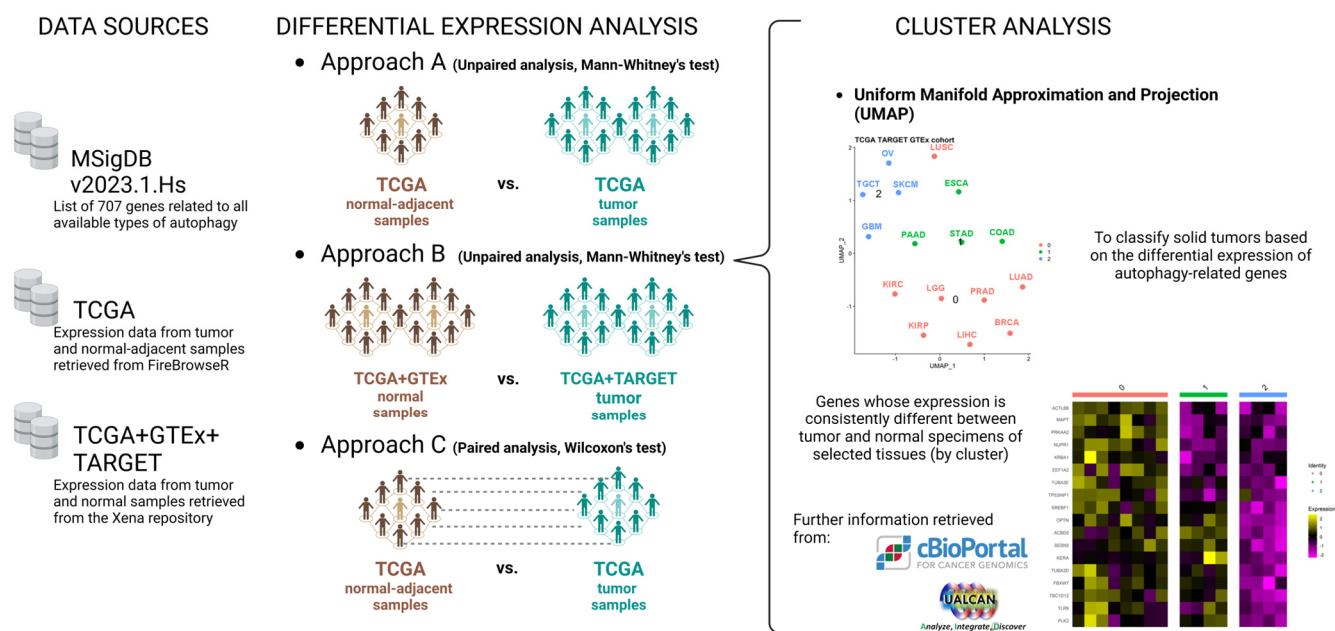

**Figure S1:** workflow used in this study.

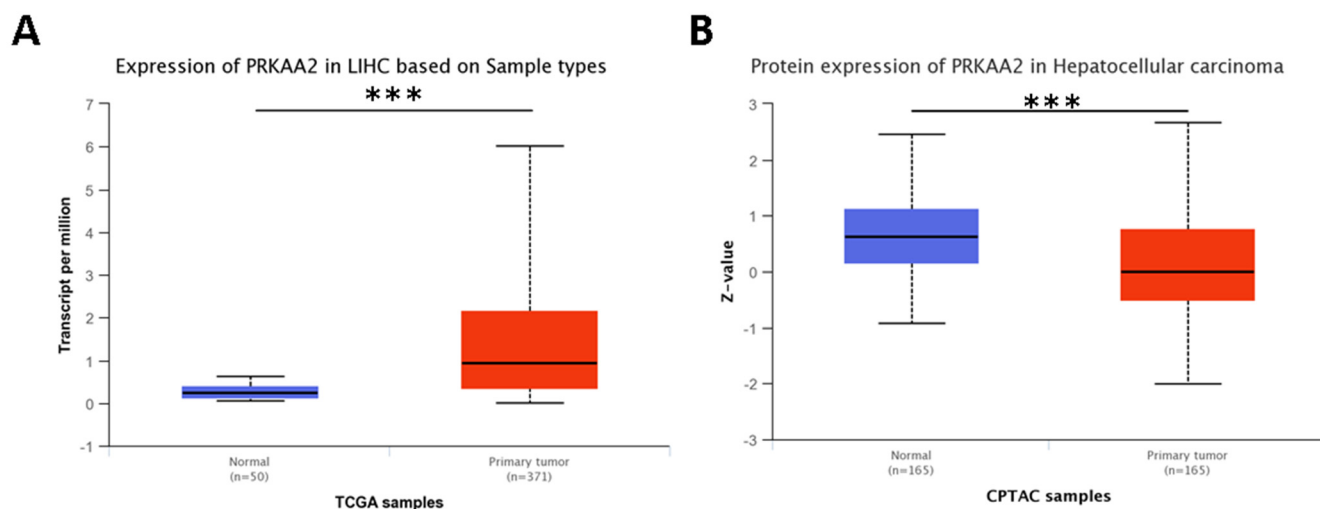

**Figure S2:** *PRKKA2* is an autophagy-related gene with divergences in its transcript and proteomic levels in LIHC. We evaluated transcriptomic (A) and proteomic (B) levels of the *PRKKA2* gene in the LIHC dataset. Results are contrasting. \*\*\* represents comparisons with  $p$  value  $< 0.001$  on Welch's  $t$ -test.

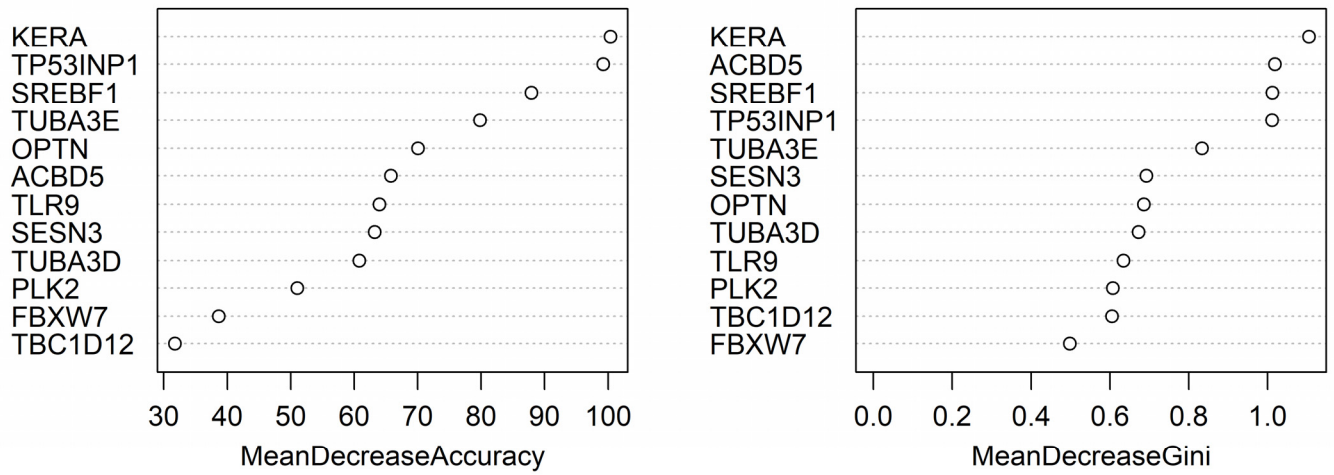

**Figure S3:** accuracy (left) and Gini (right) contributions of genes relative to the clusters 0 + 1 vs. 2.
