# Supplementary material for: Insights from a Computational-Based Approach for Analyzing Autophagy Genes across Human Cancers
Source: Genes (Basel). 2023 Jul 28;14(8):1550. doi: 10.3390/genes14081550 (PMC10454514; doi:10.3390/genes14081550)
Supplement: Supplementary file 1 [file genes-14-01550-s001.zip › Table S1.xlsx]

## Sheet: Table S1.
Table S1. List of genes belonging to autophagy-related processes.
Number	Category	Subcategory	Name	Gene Symbol	Ensembl Gene
1	C5	GO:BP	GOBP_AGGREPHAGY	ACBD5	ENSG00000107897
2	C5	GO:BP	GOBP_AGGREPHAGY	ATG5	ENSG00000057663
3	C5	GO:BP	GOBP_AGGREPHAGY	BAG3	ENSG00000151929
4	C5	GO:BP	GOBP_AGGREPHAGY	HSPB8	ENSG00000152137
5	C5	GO:BP	GOBP_AGGREPHAGY	HTT	ENSG00000197386
6	C5	GO:BP	GOBP_AGGREPHAGY	MAP1LC3C	ENSG00000197769
7	C5	GO:BP	GOBP_AGGREPHAGY	SQSTM1	ENSG00000161011
8	C5	GO:BP	GOBP_AGGREPHAGY	SQSTM1	ENSG00000284099
9	C5	GO:BP	GOBP_AGGREPHAGY	UBQLN1	ENSG00000135018
10	C5	GO:BP	GOBP_AGGREPHAGY	WDFY3	ENSG00000163625
11	C5	GO:BP	GOBP_AGGREPHAGY	WDR81	ENSG00000167716
12	C5	GO:BP	GOBP_AGGREPHAGY	WDR81	ENSG00000276021
13	C5	GO:BP	GOBP_AUTOPHAGOSOME_LYSOSOME_FUSION	ARL8B	ENSG00000134108
14	C5	GO:BP	GOBP_AUTOPHAGOSOME_LYSOSOME_FUSION	ATP13A2	ENSG00000159363
15	C5	GO:BP	GOBP_AUTOPHAGOSOME_LYSOSOME_FUSION	CLN3	ENSG00000188603
16	C5	GO:BP	GOBP_AUTOPHAGOSOME_LYSOSOME_FUSION	PIP4K2A	ENSG00000150867
17	C5	GO:BP	GOBP_AUTOPHAGOSOME_LYSOSOME_FUSION	PIP4K2B	ENSG00000276293
18	C5	GO:BP	GOBP_AUTOPHAGOSOME_LYSOSOME_FUSION	PIP4K2B	ENSG00000277292
19	C5	GO:BP	GOBP_AUTOPHAGOSOME_LYSOSOME_FUSION	PLEKHM1	ENSG00000225190
20	C5	GO:BP	GOBP_AUTOPHAGOSOME_LYSOSOME_FUSION	PLEKHM1	ENSG00000276358
21	C5	GO:BP	GOBP_AUTOPHAGOSOME_LYSOSOME_FUSION	PLEKHM1	ENSG00000277111
22	C5	GO:BP	GOBP_AUTOPHAGOSOME_LYSOSOME_FUSION	RUBCNL	ENSG00000102445
23	C5	GO:BP	GOBP_AUTOPHAGOSOME_LYSOSOME_FUSION	VPS39	ENSG00000166887
24	C5	GO:BP	GOBP_AUTOPHAGOSOME_MATURATION	ADRB2	ENSG00000169252
25	C5	GO:BP	GOBP_AUTOPHAGOSOME_MATURATION	ATG12	ENSG00000145782
26	C5	GO:BP	GOBP_AUTOPHAGOSOME_MATURATION	ATG14	ENSG00000126775
27	C5	GO:BP	GOBP_AUTOPHAGOSOME_MATURATION	ATG5	ENSG00000057663
28	C5	GO:BP	GOBP_AUTOPHAGOSOME_MATURATION	ATP2A2	ENSG00000174437
29	C5	GO:BP	GOBP_AUTOPHAGOSOME_MATURATION	BECN1	ENSG00000126581
30	C5	GO:BP	GOBP_AUTOPHAGOSOME_MATURATION	CALCOCO2	ENSG00000136436
31	C5	GO:BP	GOBP_AUTOPHAGOSOME_MATURATION	CALM1	ENSG00000198668
32	C5	GO:BP	GOBP_AUTOPHAGOSOME_MATURATION	CHMP1A	ENSG00000131165
33	C5	GO:BP	GOBP_AUTOPHAGOSOME_MATURATION	CHMP1B	ENSG00000255112
34	C5	GO:BP	GOBP_AUTOPHAGOSOME_MATURATION	CHMP2A	ENSG00000130724
35	C5	GO:BP	GOBP_AUTOPHAGOSOME_MATURATION	CHMP2B	ENSG00000083937
36	C5	GO:BP	GOBP_AUTOPHAGOSOME_MATURATION	CHMP3	ENSG00000115561
37	C5	GO:BP	GOBP_AUTOPHAGOSOME_MATURATION	CHMP4A	ENSG00000254505
38	C5	GO:BP	GOBP_AUTOPHAGOSOME_MATURATION	CHMP4A	ENSG00000285302
39	C5	GO:BP	GOBP_AUTOPHAGOSOME_MATURATION	CHMP4B	ENSG00000101421
40	C5	GO:BP	GOBP_AUTOPHAGOSOME_MATURATION	CHMP4C	ENSG00000164695
41	C5	GO:BP	GOBP_AUTOPHAGOSOME_MATURATION	CHMP5	ENSG00000086065
42	C5	GO:BP	GOBP_AUTOPHAGOSOME_MATURATION	CHMP6	ENSG00000176108
43	C5	GO:BP	GOBP_AUTOPHAGOSOME_MATURATION	CHMP7	ENSG00000147457
44	C5	GO:BP	GOBP_AUTOPHAGOSOME_MATURATION	CLEC16A	ENSG00000038532
45	C5	GO:BP	GOBP_AUTOPHAGOSOME_MATURATION	CLN3	ENSG00000188603
46	C5	GO:BP	GOBP_AUTOPHAGOSOME_MATURATION	EPG5	ENSG00000152223
47	C5	GO:BP	GOBP_AUTOPHAGOSOME_MATURATION	FYCO1	ENSG00000163820
48	C5	GO:BP	GOBP_AUTOPHAGOSOME_MATURATION	IRGM	ENSG00000237693
49	C5	GO:BP	GOBP_AUTOPHAGOSOME_MATURATION	LAMP2	ENSG00000005893
50	C5	GO:BP	GOBP_AUTOPHAGOSOME_MATURATION	LIX1	ENSG00000145721
51	C5	GO:BP	GOBP_AUTOPHAGOSOME_MATURATION	LIX1L	ENSG00000271601
52	C5	GO:BP	GOBP_AUTOPHAGOSOME_MATURATION	MAP1LC3A	ENSG00000101460
53	C5	GO:BP	GOBP_AUTOPHAGOSOME_MATURATION	MAP1LC3B	ENSG00000140941
54	C5	GO:BP	GOBP_AUTOPHAGOSOME_MATURATION	MAP1LC3B2	ENSG00000258102
55	C5	GO:BP	GOBP_AUTOPHAGOSOME_MATURATION	MAP1LC3C	ENSG00000197769
56	C5	GO:BP	GOBP_AUTOPHAGOSOME_MATURATION	MCOLN1	ENSG00000090674
57	C5	GO:BP	GOBP_AUTOPHAGOSOME_MATURATION	MFSD8	ENSG00000164073
58	C5	GO:BP	GOBP_AUTOPHAGOSOME_MATURATION	PHF23	ENSG00000040633
59	C5	GO:BP	GOBP_AUTOPHAGOSOME_MATURATION	PIK3C3	ENSG00000078142
60	C5	GO:BP	GOBP_AUTOPHAGOSOME_MATURATION	PIK3R4	ENSG00000196455
61	C5	GO:BP	GOBP_AUTOPHAGOSOME_MATURATION	RUBCN	ENSG00000145016
62	C5	GO:BP	GOBP_AUTOPHAGOSOME_MATURATION	RUBCNL	ENSG00000102445
63	C5	GO:BP	GOBP_AUTOPHAGOSOME_MATURATION	SMCR8	ENSG00000176994
64	C5	GO:BP	GOBP_AUTOPHAGOSOME_MATURATION	SMCR8	ENSG00000283741
65	C5	GO:BP	GOBP_AUTOPHAGOSOME_MATURATION	SNAP29	ENSG00000099940
66	C5	GO:BP	GOBP_AUTOPHAGOSOME_MATURATION	SNAPIN	ENSG00000143553
67	C5	GO:BP	GOBP_AUTOPHAGOSOME_MATURATION	SNX14	ENSG00000135317
68	C5	GO:BP	GOBP_AUTOPHAGOSOME_MATURATION	STX17	ENSG00000136874
69	C5	GO:BP	GOBP_AUTOPHAGOSOME_MATURATION	TBC1D25	ENSG00000068354
70	C5	GO:BP	GOBP_AUTOPHAGOSOME_MATURATION	TECPR1	ENSG00000205356
71	C5	GO:BP	GOBP_AUTOPHAGOSOME_MATURATION	TMEM39A	ENSG00000176142
72	C5	GO:BP	GOBP_AUTOPHAGOSOME_MATURATION	TSG101	ENSG00000074319
73	C5	GO:BP	GOBP_AUTOPHAGOSOME_MATURATION	UBQLN1	ENSG00000135018
74	C5	GO:BP	GOBP_AUTOPHAGOSOME_MATURATION	UBQLN4	ENSG00000160803
75	C5	GO:BP	GOBP_AUTOPHAGOSOME_MATURATION	UVRAG	ENSG00000198382
76	C5	GO:BP	GOBP_AUTOPHAGOSOME_MATURATION	VAMP7	ENSG00000124333
77	C5	GO:BP	GOBP_AUTOPHAGOSOME_MATURATION	VAMP8	ENSG00000118640
78	C5	GO:BP	GOBP_AUTOPHAGOSOME_MATURATION	VCP	ENSG00000165280
79	C5	GO:BP	GOBP_AUTOPHAGOSOME_MATURATION	VIPAS39	ENSG00000151445
80	C5	GO:BP	GOBP_AUTOPHAGOSOME_MATURATION	VMP1	ENSG00000062716
81	C5	GO:BP	GOBP_AUTOPHAGOSOME_MATURATION	VPS16	ENSG00000215305
82	C5	GO:BP	GOBP_AUTOPHAGOSOME_MATURATION	VPS33A	ENSG00000139719
83	C5	GO:BP	GOBP_AUTOPHAGOSOME_MATURATION	VPS33B	ENSG00000184056
84	C5	GO:BP	GOBP_AUTOPHAGOSOME_MATURATION	VTI1B	ENSG00000100568
85	C5	GO:BP	GOBP_AUTOPHAGOSOME_MATURATION	WIPI2	ENSG00000157954
86	C5	GO:BP	GOBP_AUTOPHAGOSOME_MEMBRANE_DOCKING	ATG14	ENSG00000126775
87	C5	GO:BP	GOBP_AUTOPHAGOSOME_MEMBRANE_DOCKING	ATP2A2	ENSG00000174437
88	C5	GO:BP	GOBP_AUTOPHAGOSOME_MEMBRANE_DOCKING	CALM1	ENSG00000198668
89	C5	GO:BP	GOBP_AUTOPHAGOSOME_MEMBRANE_DOCKING	SNAP29	ENSG00000099940
90	C5	GO:BP	GOBP_AUTOPHAGOSOME_MEMBRANE_DOCKING	STX17	ENSG00000136874
91	C5	GO:BP	GOBP_AUTOPHAGOSOME_MEMBRANE_DOCKING	VAMP8	ENSG00000118640
92	C5	GO:BP	GOBP_AUTOPHAGOSOME_MEMBRANE_DOCKING	VMP1	ENSG00000062716
93	C5	GO:BP	GOBP_AUTOPHAGOSOME_ORGANIZATION	ADPRH	ENSG00000144843
94	C5	GO:BP	GOBP_AUTOPHAGOSOME_ORGANIZATION	AMBRA1	ENSG00000110497
95	C5	GO:BP	GOBP_AUTOPHAGOSOME_ORGANIZATION	AP4M1	ENSG00000221838
96	C5	GO:BP	GOBP_AUTOPHAGOSOME_ORGANIZATION	ARFIP2	ENSG00000132254
97	C5	GO:BP	GOBP_AUTOPHAGOSOME_ORGANIZATION	ATG101	ENSG00000123395
98	C5	GO:BP	GOBP_AUTOPHAGOSOME_ORGANIZATION	ATG12	ENSG00000145782
99	C5	GO:BP	GOBP_AUTOPHAGOSOME_ORGANIZATION	ATG13	ENSG00000175224
100	C5	GO:BP	GOBP_AUTOPHAGOSOME_ORGANIZATION	ATG14	ENSG00000126775
101	C5	GO:BP	GOBP_AUTOPHAGOSOME_ORGANIZATION	ATG16L1	ENSG00000085978
102	C5	GO:BP	GOBP_AUTOPHAGOSOME_ORGANIZATION	ATG16L1	ENSG00000281089
103	C5	GO:BP	GOBP_AUTOPHAGOSOME_ORGANIZATION	ATG16L2	ENSG00000168010
104	C5	GO:BP	GOBP_AUTOPHAGOSOME_ORGANIZATION	ATG2A	ENSG00000110046
105	C5	GO:BP	GOBP_AUTOPHAGOSOME_ORGANIZATION	ATG2B	ENSG00000066739
106	C5	GO:BP	GOBP_AUTOPHAGOSOME_ORGANIZATION	ATG3	ENSG00000144848
107	C5	GO:BP	GOBP_AUTOPHAGOSOME_ORGANIZATION	ATG4B	ENSG00000168397
108	C5	GO:BP	GOBP_AUTOPHAGOSOME_ORGANIZATION	ATG4D	ENSG00000130734
109	C5	GO:BP	GOBP_AUTOPHAGOSOME_ORGANIZATION	ATG5	ENSG00000057663
110	C5	GO:BP	GOBP_AUTOPHAGOSOME_ORGANIZATION	ATG7	ENSG00000197548
111	C5	GO:BP	GOBP_AUTOPHAGOSOME_ORGANIZATION	ATG9A	ENSG00000198925
112	C5	GO:BP	GOBP_AUTOPHAGOSOME_ORGANIZATION	ATG9B	ENSG00000181652
113	C5	GO:BP	GOBP_AUTOPHAGOSOME_ORGANIZATION	ATP13A2	ENSG00000159363
114	C5	GO:BP	GOBP_AUTOPHAGOSOME_ORGANIZATION	ATP2A2	ENSG00000174437
115	C5	GO:BP	GOBP_AUTOPHAGOSOME_ORGANIZATION	BAG3	ENSG00000151929
116	C5	GO:BP	GOBP_AUTOPHAGOSOME_ORGANIZATION	BECN1	ENSG00000126581
117	C5	GO:BP	GOBP_AUTOPHAGOSOME_ORGANIZATION	BECN2	ENSG00000196289
118	C5	GO:BP	GOBP_AUTOPHAGOSOME_ORGANIZATION	C9orf72	ENSG00000147894
119	C5	GO:BP	GOBP_AUTOPHAGOSOME_ORGANIZATION	CHMP4A	ENSG00000254505
120	C5	GO:BP	GOBP_AUTOPHAGOSOME_ORGANIZATION	CHMP4A	ENSG00000285302
121	C5	GO:BP	GOBP_AUTOPHAGOSOME_ORGANIZATION	CHMP4B	ENSG00000101421
122	C5	GO:BP	GOBP_AUTOPHAGOSOME_ORGANIZATION	CLN3	ENSG00000188603
123	C5	GO:BP	GOBP_AUTOPHAGOSOME_ORGANIZATION	EHMT2	ENSG00000204371
124	C5	GO:BP	GOBP_AUTOPHAGOSOME_ORGANIZATION	EHMT2	ENSG00000206376
125	C5	GO:BP	GOBP_AUTOPHAGOSOME_ORGANIZATION	EHMT2	ENSG00000224143
126	C5	GO:BP	GOBP_AUTOPHAGOSOME_ORGANIZATION	EHMT2	ENSG00000227333
127	C5	GO:BP	GOBP_AUTOPHAGOSOME_ORGANIZATION	EHMT2	ENSG00000232045
128	C5	GO:BP	GOBP_AUTOPHAGOSOME_ORGANIZATION	EHMT2	ENSG00000236759
129	C5	GO:BP	GOBP_AUTOPHAGOSOME_ORGANIZATION	EHMT2	ENSG00000238134
130	C5	GO:BP	GOBP_AUTOPHAGOSOME_ORGANIZATION	ELAPOR1	ENSG00000116299
131	C5	GO:BP	GOBP_AUTOPHAGOSOME_ORGANIZATION	EMC6	ENSG00000127774
132	C5	GO:BP	GOBP_AUTOPHAGOSOME_ORGANIZATION	FEZ1	ENSG00000149557
133	C5	GO:BP	GOBP_AUTOPHAGOSOME_ORGANIZATION	FEZ2	ENSG00000171055
134	C5	GO:BP	GOBP_AUTOPHAGOSOME_ORGANIZATION	GABARAP	ENSG00000170296
135	C5	GO:BP	GOBP_AUTOPHAGOSOME_ORGANIZATION	GABARAPL1	ENSG00000139112
136	C5	GO:BP	GOBP_AUTOPHAGOSOME_ORGANIZATION	GABARAPL2	ENSG00000034713
137	C5	GO:BP	GOBP_AUTOPHAGOSOME_ORGANIZATION	GABARAPL3	ENSG00000238244
138	C5	GO:BP	GOBP_AUTOPHAGOSOME_ORGANIZATION	GABARAPL3	ENSG00000279980
139	C5	GO:BP	GOBP_AUTOPHAGOSOME_ORGANIZATION	GBA	ENSG00000177628
140	C5	GO:BP	GOBP_AUTOPHAGOSOME_ORGANIZATION	GBA	ENSG00000262446
141	C5	GO:BP	GOBP_AUTOPHAGOSOME_ORGANIZATION	IFT20	ENSG00000109083
142	C5	GO:BP	GOBP_AUTOPHAGOSOME_ORGANIZATION	IFT88	ENSG00000032742
143	C5	GO:BP	GOBP_AUTOPHAGOSOME_ORGANIZATION	IRGM	ENSG00000237693
144	C5	GO:BP	GOBP_AUTOPHAGOSOME_ORGANIZATION	LRBA	ENSG00000198589
145	C5	GO:BP	GOBP_AUTOPHAGOSOME_ORGANIZATION	LRRK2	ENSG00000188906
146	C5	GO:BP	GOBP_AUTOPHAGOSOME_ORGANIZATION	LRSAM1	ENSG00000148356
147	C5	GO:BP	GOBP_AUTOPHAGOSOME_ORGANIZATION	MAP1LC3A	ENSG00000101460
148	C5	GO:BP	GOBP_AUTOPHAGOSOME_ORGANIZATION	MAP1LC3B	ENSG00000140941
149	C5	GO:BP	GOBP_AUTOPHAGOSOME_ORGANIZATION	MAP1LC3B2	ENSG00000258102
150	C5	GO:BP	GOBP_AUTOPHAGOSOME_ORGANIZATION	MAP1LC3C	ENSG00000197769
151	C5	GO:BP	GOBP_AUTOPHAGOSOME_ORGANIZATION	MFN2	ENSG00000116688
152	C5	GO:BP	GOBP_AUTOPHAGOSOME_ORGANIZATION	MOAP1	ENSG00000165943
153	C5	GO:BP	GOBP_AUTOPHAGOSOME_ORGANIZATION	MOAP1	ENSG00000278268
154	C5	GO:BP	GOBP_AUTOPHAGOSOME_ORGANIZATION	MTM1	ENSG00000171100
155	C5	GO:BP	GOBP_AUTOPHAGOSOME_ORGANIZATION	MTMR3	ENSG00000100330
156	C5	GO:BP	GOBP_AUTOPHAGOSOME_ORGANIZATION	NSFL1C	ENSG00000088833
2290	C2	CGP	KUMAR_AUTOPHAGY_NETWORK	ACTL6B	ENSG00000077080
158	C5	GO:BP	GOBP_AUTOPHAGOSOME_ORGANIZATION	PACS2	ENSG00000179364
159	C5	GO:BP	GOBP_AUTOPHAGOSOME_ORGANIZATION	PHF23	ENSG00000040633
160	C5	GO:BP	GOBP_AUTOPHAGOSOME_ORGANIZATION	PIK3C3	ENSG00000078142
161	C5	GO:BP	GOBP_AUTOPHAGOSOME_ORGANIZATION	PIKFYVE	ENSG00000115020
162	C5	GO:BP	GOBP_AUTOPHAGOSOME_ORGANIZATION	PINK1	ENSG00000158828
163	C5	GO:BP	GOBP_AUTOPHAGOSOME_ORGANIZATION	PIP4K2A	ENSG00000150867
164	C5	GO:BP	GOBP_AUTOPHAGOSOME_ORGANIZATION	PIP4K2B	ENSG00000276293
165	C5	GO:BP	GOBP_AUTOPHAGOSOME_ORGANIZATION	PIP4K2B	ENSG00000277292
166	C5	GO:BP	GOBP_AUTOPHAGOSOME_ORGANIZATION	PIP4K2C	ENSG00000166908
167	C5	GO:BP	GOBP_AUTOPHAGOSOME_ORGANIZATION	PSEN1	ENSG00000080815
168	C5	GO:BP	GOBP_AUTOPHAGOSOME_ORGANIZATION	RAB19	ENSG00000146955
169	C5	GO:BP	GOBP_AUTOPHAGOSOME_ORGANIZATION	RAB1A	ENSG00000138069
170	C5	GO:BP	GOBP_AUTOPHAGOSOME_ORGANIZATION	RAB1B	ENSG00000174903
171	C5	GO:BP	GOBP_AUTOPHAGOSOME_ORGANIZATION	RAB1C	ENSG00000233111
172	C5	GO:BP	GOBP_AUTOPHAGOSOME_ORGANIZATION	RAB23	ENSG00000112210
173	C5	GO:BP	GOBP_AUTOPHAGOSOME_ORGANIZATION	RAB33B	ENSG00000172007
174	C5	GO:BP	GOBP_AUTOPHAGOSOME_ORGANIZATION	RAB3GAP1	ENSG00000115839
175	C5	GO:BP	GOBP_AUTOPHAGOSOME_ORGANIZATION	RAB3GAP2	ENSG00000118873
176	C5	GO:BP	GOBP_AUTOPHAGOSOME_ORGANIZATION	RAB43	ENSG00000172780
177	C5	GO:BP	GOBP_AUTOPHAGOSOME_ORGANIZATION	RAB5A	ENSG00000144566
178	C5	GO:BP	GOBP_AUTOPHAGOSOME_ORGANIZATION	RAB7A	ENSG00000075785
179	C5	GO:BP	GOBP_AUTOPHAGOSOME_ORGANIZATION	RALB	ENSG00000144118
180	C5	GO:BP	GOBP_AUTOPHAGOSOME_ORGANIZATION	RB1CC1	ENSG00000023287
181	C5	GO:BP	GOBP_AUTOPHAGOSOME_ORGANIZATION	RNF5	ENSG00000183574
182	C5	GO:BP	GOBP_AUTOPHAGOSOME_ORGANIZATION	RNF5	ENSG00000204308
183	C5	GO:BP	GOBP_AUTOPHAGOSOME_ORGANIZATION	RNF5	ENSG00000223767
184	C5	GO:BP	GOBP_AUTOPHAGOSOME_ORGANIZATION	RNF5	ENSG00000225452
185	C5	GO:BP	GOBP_AUTOPHAGOSOME_ORGANIZATION	RNF5	ENSG00000227277
186	C5	GO:BP	GOBP_AUTOPHAGOSOME_ORGANIZATION	RNF5	ENSG00000228405
187	C5	GO:BP	GOBP_AUTOPHAGOSOME_ORGANIZATION	RNF5	ENSG00000228907
188	C5	GO:BP	GOBP_AUTOPHAGOSOME_ORGANIZATION	RUFY4	ENSG00000188282
189	C5	GO:BP	GOBP_AUTOPHAGOSOME_ORGANIZATION	SCFD1	ENSG00000092108
190	C5	GO:BP	GOBP_AUTOPHAGOSOME_ORGANIZATION	SEC22B	ENSG00000265808
191	C5	GO:BP	GOBP_AUTOPHAGOSOME_ORGANIZATION	SH3GLB1	ENSG00000097033
192	C5	GO:BP	GOBP_AUTOPHAGOSOME_ORGANIZATION	SMCR8	ENSG00000176994
193	C5	GO:BP	GOBP_AUTOPHAGOSOME_ORGANIZATION	SMCR8	ENSG00000283741
194	C5	GO:BP	GOBP_AUTOPHAGOSOME_ORGANIZATION	SMURF1	ENSG00000198742
195	C5	GO:BP	GOBP_AUTOPHAGOSOME_ORGANIZATION	SMURF1	ENSG00000284126
196	C5	GO:BP	GOBP_AUTOPHAGOSOME_ORGANIZATION	SNX18	ENSG00000178996
197	C5	GO:BP	GOBP_AUTOPHAGOSOME_ORGANIZATION	SNX30	ENSG00000148158
198	C5	GO:BP	GOBP_AUTOPHAGOSOME_ORGANIZATION	SNX4	ENSG00000114520
199	C5	GO:BP	GOBP_AUTOPHAGOSOME_ORGANIZATION	SNX7	ENSG00000162627
200	C5	GO:BP	GOBP_AUTOPHAGOSOME_ORGANIZATION	STING1	ENSG00000184584
201	C5	GO:BP	GOBP_AUTOPHAGOSOME_ORGANIZATION	STING1	ENSG00000288243
202	C5	GO:BP	GOBP_AUTOPHAGOSOME_ORGANIZATION	STX12	ENSG00000117758
203	C5	GO:BP	GOBP_AUTOPHAGOSOME_ORGANIZATION	STX17	ENSG00000136874
204	C5	GO:BP	GOBP_AUTOPHAGOSOME_ORGANIZATION	SYNPO2	ENSG00000172403
205	C5	GO:BP	GOBP_AUTOPHAGOSOME_ORGANIZATION	TBC1D12	ENSG00000108239
206	C5	GO:BP	GOBP_AUTOPHAGOSOME_ORGANIZATION	TBC1D14	ENSG00000132405
207	C5	GO:BP	GOBP_AUTOPHAGOSOME_ORGANIZATION	TCIRG1	ENSG00000110719
208	C5	GO:BP	GOBP_AUTOPHAGOSOME_ORGANIZATION	TMEM39A	ENSG00000176142
209	C5	GO:BP	GOBP_AUTOPHAGOSOME_ORGANIZATION	TMEM41B	ENSG00000166471
349	C5	GO:BP	GOBP_CHAPERONE_MEDIATED_AUTOPHAGY	EEF1A2	ENSG00000101210
211	C5	GO:BP	GOBP_AUTOPHAGOSOME_ORGANIZATION	TP53INP2	ENSG00000078804
212	C5	GO:BP	GOBP_AUTOPHAGOSOME_ORGANIZATION	TRAPPC8	ENSG00000153339
213	C5	GO:BP	GOBP_AUTOPHAGOSOME_ORGANIZATION	UBQLN1	ENSG00000135018
214	C5	GO:BP	GOBP_AUTOPHAGOSOME_ORGANIZATION	UBQLN2	ENSG00000188021
215	C5	GO:BP	GOBP_AUTOPHAGOSOME_ORGANIZATION	UBXN2A	ENSG00000173960
216	C5	GO:BP	GOBP_AUTOPHAGOSOME_ORGANIZATION	UBXN2B	ENSG00000215114
217	C5	GO:BP	GOBP_AUTOPHAGOSOME_ORGANIZATION	ULK1	ENSG00000177169
218	C5	GO:BP	GOBP_AUTOPHAGOSOME_ORGANIZATION	ULK2	ENSG00000083290
219	C5	GO:BP	GOBP_AUTOPHAGOSOME_ORGANIZATION	ULK3	ENSG00000140474
220	C5	GO:BP	GOBP_AUTOPHAGOSOME_ORGANIZATION	VMP1	ENSG00000062716
221	C5	GO:BP	GOBP_AUTOPHAGOSOME_ORGANIZATION	WDR45	ENSG00000188378
222	C5	GO:BP	GOBP_AUTOPHAGOSOME_ORGANIZATION	WDR45	ENSG00000196998
223	C5	GO:BP	GOBP_AUTOPHAGOSOME_ORGANIZATION	WDR45B	ENSG00000141580
224	C5	GO:BP	GOBP_AUTOPHAGOSOME_ORGANIZATION	WIPI1	ENSG00000070540
225	C5	GO:BP	GOBP_AUTOPHAGOSOME_ORGANIZATION	WIPI2	ENSG00000157954
226	C5	GO:BP	GOBP_AUTOPHAGY_OF_MITOCHONDRION	AMBRA1	ENSG00000110497
227	C5	GO:BP	GOBP_AUTOPHAGY_OF_MITOCHONDRION	ARFIP2	ENSG00000132254
228	C5	GO:BP	GOBP_AUTOPHAGY_OF_MITOCHONDRION	ATG12	ENSG00000145782
229	C5	GO:BP	GOBP_AUTOPHAGY_OF_MITOCHONDRION	ATG13	ENSG00000175224
230	C5	GO:BP	GOBP_AUTOPHAGY_OF_MITOCHONDRION	ATG14	ENSG00000126775
231	C5	GO:BP	GOBP_AUTOPHAGY_OF_MITOCHONDRION	ATG2A	ENSG00000110046
232	C5	GO:BP	GOBP_AUTOPHAGY_OF_MITOCHONDRION	ATG2B	ENSG00000066739
233	C5	GO:BP	GOBP_AUTOPHAGY_OF_MITOCHONDRION	ATG3	ENSG00000144848
234	C5	GO:BP	GOBP_AUTOPHAGY_OF_MITOCHONDRION	ATG4B	ENSG00000168397
235	C5	GO:BP	GOBP_AUTOPHAGY_OF_MITOCHONDRION	ATG4D	ENSG00000130734
236	C5	GO:BP	GOBP_AUTOPHAGY_OF_MITOCHONDRION	ATG5	ENSG00000057663
237	C5	GO:BP	GOBP_AUTOPHAGY_OF_MITOCHONDRION	ATG7	ENSG00000197548
238	C5	GO:BP	GOBP_AUTOPHAGY_OF_MITOCHONDRION	ATG9A	ENSG00000198925
239	C5	GO:BP	GOBP_AUTOPHAGY_OF_MITOCHONDRION	ATG9B	ENSG00000181652
240	C5	GO:BP	GOBP_AUTOPHAGY_OF_MITOCHONDRION	ATP13A2	ENSG00000159363
241	C5	GO:BP	GOBP_AUTOPHAGY_OF_MITOCHONDRION	ATP5IF1	ENSG00000130770
242	C5	GO:BP	GOBP_AUTOPHAGY_OF_MITOCHONDRION	ATP5IF1	ENSG00000285390
243	C5	GO:BP	GOBP_AUTOPHAGY_OF_MITOCHONDRION	BECN1	ENSG00000126581
244	C5	GO:BP	GOBP_AUTOPHAGY_OF_MITOCHONDRION	BNIP3	ENSG00000176171
245	C5	GO:BP	GOBP_AUTOPHAGY_OF_MITOCHONDRION	BNIP3L	ENSG00000104765
246	C5	GO:BP	GOBP_AUTOPHAGY_OF_MITOCHONDRION	C5orf51	ENSG00000205765
247	C5	GO:BP	GOBP_AUTOPHAGY_OF_MITOCHONDRION	CAMKK2	ENSG00000110931
248	C5	GO:BP	GOBP_AUTOPHAGY_OF_MITOCHONDRION	CDC37	ENSG00000105401
249	C5	GO:BP	GOBP_AUTOPHAGY_OF_MITOCHONDRION	CERS1	ENSG00000223802
250	C5	GO:BP	GOBP_AUTOPHAGY_OF_MITOCHONDRION	CISD2	ENSG00000145354
251	C5	GO:BP	GOBP_AUTOPHAGY_OF_MITOCHONDRION	CSNK2A2	ENSG00000070770
252	C5	GO:BP	GOBP_AUTOPHAGY_OF_MITOCHONDRION	CTSK	ENSG00000143387
253	C5	GO:BP	GOBP_AUTOPHAGY_OF_MITOCHONDRION	CTTN	ENSG00000085733
254	C5	GO:BP	GOBP_AUTOPHAGY_OF_MITOCHONDRION	CTTN	ENSG00000288401
255	C5	GO:BP	GOBP_AUTOPHAGY_OF_MITOCHONDRION	DNM1L	ENSG00000087470
256	C5	GO:BP	GOBP_AUTOPHAGY_OF_MITOCHONDRION	FBXO7	ENSG00000100225
257	C5	GO:BP	GOBP_AUTOPHAGY_OF_MITOCHONDRION	FBXW7	ENSG00000109670
258	C5	GO:BP	GOBP_AUTOPHAGY_OF_MITOCHONDRION	FIS1	ENSG00000214253
259	C5	GO:BP	GOBP_AUTOPHAGY_OF_MITOCHONDRION	FUNDC1	ENSG00000069509
260	C5	GO:BP	GOBP_AUTOPHAGY_OF_MITOCHONDRION	FUNDC2	ENSG00000165775
261	C5	GO:BP	GOBP_AUTOPHAGY_OF_MITOCHONDRION	FZD5	ENSG00000163251
262	C5	GO:BP	GOBP_AUTOPHAGY_OF_MITOCHONDRION	GABARAP	ENSG00000170296
263	C5	GO:BP	GOBP_AUTOPHAGY_OF_MITOCHONDRION	GABARAPL1	ENSG00000139112
264	C5	GO:BP	GOBP_AUTOPHAGY_OF_MITOCHONDRION	GABARAPL2	ENSG00000034713
265	C5	GO:BP	GOBP_AUTOPHAGY_OF_MITOCHONDRION	GABARAPL3	ENSG00000238244
266	C5	GO:BP	GOBP_AUTOPHAGY_OF_MITOCHONDRION	GABARAPL3	ENSG00000279980
267	C5	GO:BP	GOBP_AUTOPHAGY_OF_MITOCHONDRION	GBA	ENSG00000177628
268	C5	GO:BP	GOBP_AUTOPHAGY_OF_MITOCHONDRION	GBA	ENSG00000262446
269	C5	GO:BP	GOBP_AUTOPHAGY_OF_MITOCHONDRION	GSK3A	ENSG00000105723
270	C5	GO:BP	GOBP_AUTOPHAGY_OF_MITOCHONDRION	HAX1	ENSG00000143575
271	C5	GO:BP	GOBP_AUTOPHAGY_OF_MITOCHONDRION	HDAC6	ENSG00000094631
272	C5	GO:BP	GOBP_AUTOPHAGY_OF_MITOCHONDRION	HIF1A	ENSG00000100644
273	C5	GO:BP	GOBP_AUTOPHAGY_OF_MITOCHONDRION	HK2	ENSG00000159399
274	C5	GO:BP	GOBP_AUTOPHAGY_OF_MITOCHONDRION	HTRA2	ENSG00000115317
275	C5	GO:BP	GOBP_AUTOPHAGY_OF_MITOCHONDRION	HTT	ENSG00000197386
276	C5	GO:BP	GOBP_AUTOPHAGY_OF_MITOCHONDRION	HUWE1	ENSG00000086758
277	C5	GO:BP	GOBP_AUTOPHAGY_OF_MITOCHONDRION	LRBA	ENSG00000198589
278	C5	GO:BP	GOBP_AUTOPHAGY_OF_MITOCHONDRION	MAP1LC3A	ENSG00000101460
279	C5	GO:BP	GOBP_AUTOPHAGY_OF_MITOCHONDRION	MAP1LC3B	ENSG00000140941
280	C5	GO:BP	GOBP_AUTOPHAGY_OF_MITOCHONDRION	MAP1LC3B2	ENSG00000258102
281	C5	GO:BP	GOBP_AUTOPHAGY_OF_MITOCHONDRION	MAP1LC3C	ENSG00000197769
282	C5	GO:BP	GOBP_AUTOPHAGY_OF_MITOCHONDRION	MARK2	ENSG00000072518
283	C5	GO:BP	GOBP_AUTOPHAGY_OF_MITOCHONDRION	MFN2	ENSG00000116688
284	C5	GO:BP	GOBP_AUTOPHAGY_OF_MITOCHONDRION	MUL1	ENSG00000090432
285	C5	GO:BP	GOBP_AUTOPHAGY_OF_MITOCHONDRION	OPTN	ENSG00000123240
286	C5	GO:BP	GOBP_AUTOPHAGY_OF_MITOCHONDRION	PARK7	ENSG00000116288
287	C5	GO:BP	GOBP_AUTOPHAGY_OF_MITOCHONDRION	PARL	ENSG00000175193
288	C5	GO:BP	GOBP_AUTOPHAGY_OF_MITOCHONDRION	PHB2	ENSG00000215021
289	C5	GO:BP	GOBP_AUTOPHAGY_OF_MITOCHONDRION	PINK1	ENSG00000158828
290	C5	GO:BP	GOBP_AUTOPHAGY_OF_MITOCHONDRION	PRKN	ENSG00000185345
291	C5	GO:BP	GOBP_AUTOPHAGY_OF_MITOCHONDRION	RB1CC1	ENSG00000023287
292	C5	GO:BP	GOBP_AUTOPHAGY_OF_MITOCHONDRION	RETREG1	ENSG00000154153
293	C5	GO:BP	GOBP_AUTOPHAGY_OF_MITOCHONDRION	RNF41	ENSG00000181852
294	C5	GO:BP	GOBP_AUTOPHAGY_OF_MITOCHONDRION	SLC25A4	ENSG00000151729
295	C5	GO:BP	GOBP_AUTOPHAGY_OF_MITOCHONDRION	SLC25A46	ENSG00000164209
296	C5	GO:BP	GOBP_AUTOPHAGY_OF_MITOCHONDRION	SLC25A5	ENSG00000005022
297	C5	GO:BP	GOBP_AUTOPHAGY_OF_MITOCHONDRION	SPATA18	ENSG00000163071
298	C5	GO:BP	GOBP_AUTOPHAGY_OF_MITOCHONDRION	SQSTM1	ENSG00000161011
299	C5	GO:BP	GOBP_AUTOPHAGY_OF_MITOCHONDRION	SQSTM1	ENSG00000284099
300	C5	GO:BP	GOBP_AUTOPHAGY_OF_MITOCHONDRION	SREBF1	ENSG00000072310
301	C5	GO:BP	GOBP_AUTOPHAGY_OF_MITOCHONDRION	SREBF2	ENSG00000198911
302	C5	GO:BP	GOBP_AUTOPHAGY_OF_MITOCHONDRION	TAFAZZIN	ENSG00000102125
303	C5	GO:BP	GOBP_AUTOPHAGY_OF_MITOCHONDRION	TIGAR	ENSG00000078237
304	C5	GO:BP	GOBP_AUTOPHAGY_OF_MITOCHONDRION	TOMM7	ENSG00000196683
305	C5	GO:BP	GOBP_AUTOPHAGY_OF_MITOCHONDRION	TP53	ENSG00000141510
306	C5	GO:BP	GOBP_AUTOPHAGY_OF_MITOCHONDRION	TSC2	ENSG00000103197
307	C5	GO:BP	GOBP_AUTOPHAGY_OF_MITOCHONDRION	TSPO	ENSG00000100300
308	C5	GO:BP	GOBP_AUTOPHAGY_OF_MITOCHONDRION	ULK1	ENSG00000177169
309	C5	GO:BP	GOBP_AUTOPHAGY_OF_MITOCHONDRION	ULK2	ENSG00000083290
310	C5	GO:BP	GOBP_AUTOPHAGY_OF_MITOCHONDRION	USP30	ENSG00000135093
311	C5	GO:BP	GOBP_AUTOPHAGY_OF_MITOCHONDRION	USP36	ENSG00000055483
312	C5	GO:BP	GOBP_AUTOPHAGY_OF_MITOCHONDRION	VDAC1	ENSG00000213585
313	C5	GO:BP	GOBP_AUTOPHAGY_OF_MITOCHONDRION	VPS13C	ENSG00000129003
314	C5	GO:BP	GOBP_AUTOPHAGY_OF_MITOCHONDRION	VPS13D	ENSG00000048707
315	C5	GO:BP	GOBP_AUTOPHAGY_OF_MITOCHONDRION	WDR45	ENSG00000188378
316	C5	GO:BP	GOBP_AUTOPHAGY_OF_MITOCHONDRION	WDR45	ENSG00000196998
317	C5	GO:BP	GOBP_AUTOPHAGY_OF_MITOCHONDRION	WDR45B	ENSG00000141580
318	C5	GO:BP	GOBP_AUTOPHAGY_OF_MITOCHONDRION	WIPI1	ENSG00000070540
319	C5	GO:BP	GOBP_AUTOPHAGY_OF_MITOCHONDRION	WIPI2	ENSG00000157954
320	C5	GO:BP	GOBP_AUTOPHAGY_OF_NUCLEUS	ATG12	ENSG00000145782
321	C5	GO:BP	GOBP_AUTOPHAGY_OF_NUCLEUS	ATG13	ENSG00000175224
322	C5	GO:BP	GOBP_AUTOPHAGY_OF_NUCLEUS	ATG2A	ENSG00000110046
323	C5	GO:BP	GOBP_AUTOPHAGY_OF_NUCLEUS	ATG2B	ENSG00000066739
324	C5	GO:BP	GOBP_AUTOPHAGY_OF_NUCLEUS	ATG3	ENSG00000144848
325	C5	GO:BP	GOBP_AUTOPHAGY_OF_NUCLEUS	ATG5	ENSG00000057663
326	C5	GO:BP	GOBP_AUTOPHAGY_OF_NUCLEUS	ATG7	ENSG00000197548
327	C5	GO:BP	GOBP_AUTOPHAGY_OF_NUCLEUS	ATG9A	ENSG00000198925
328	C5	GO:BP	GOBP_AUTOPHAGY_OF_NUCLEUS	ATG9B	ENSG00000181652
329	C5	GO:BP	GOBP_AUTOPHAGY_OF_NUCLEUS	RB1CC1	ENSG00000023287
330	C5	GO:BP	GOBP_AUTOPHAGY_OF_NUCLEUS	ULK1	ENSG00000177169
331	C5	GO:BP	GOBP_AUTOPHAGY_OF_NUCLEUS	ULK2	ENSG00000083290
332	C5	GO:BP	GOBP_AUTOPHAGY_OF_NUCLEUS	WDR45	ENSG00000188378
333	C5	GO:BP	GOBP_AUTOPHAGY_OF_NUCLEUS	WDR45	ENSG00000196998
334	C5	GO:BP	GOBP_AUTOPHAGY_OF_NUCLEUS	WDR45B	ENSG00000141580
335	C5	GO:BP	GOBP_AUTOPHAGY_OF_NUCLEUS	WIPI1	ENSG00000070540
336	C5	GO:BP	GOBP_AUTOPHAGY_OF_NUCLEUS	WIPI2	ENSG00000157954
337	C5	GO:BP	GOBP_AUTOPHAGY_OF_PEROXISOME	ACBD5	ENSG00000107897
338	C5	GO:BP	GOBP_AUTOPHAGY_OF_PEROXISOME	PIK3C3	ENSG00000078142
339	C5	GO:BP	GOBP_AUTOPHAGY_OF_PEROXISOME	PIK3R4	ENSG00000196455
340	C5	GO:BP	GOBP_AUTOPHAGY_OF_PEROXISOME	PJVK	ENSG00000204311
341	C5	GO:BP	GOBP_AUTOPHAGY_OF_PEROXISOME	RB1CC1	ENSG00000023287
342	C5	GO:BP	GOBP_AUTOPHAGY_OF_PEROXISOME	USP30	ENSG00000135093
343	C5	GO:BP	GOBP_CHAPERONE_MEDIATED_AUTOPHAGY	ATG5	ENSG00000057663
344	C5	GO:BP	GOBP_CHAPERONE_MEDIATED_AUTOPHAGY	ATP13A2	ENSG00000159363
345	C5	GO:BP	GOBP_CHAPERONE_MEDIATED_AUTOPHAGY	BAG3	ENSG00000151929
346	C5	GO:BP	GOBP_CHAPERONE_MEDIATED_AUTOPHAGY	CLU	ENSG00000120885
347	C5	GO:BP	GOBP_CHAPERONE_MEDIATED_AUTOPHAGY	CTSA	ENSG00000064601
348	C5	GO:BP	GOBP_CHAPERONE_MEDIATED_AUTOPHAGY	EEF1A1	ENSG00000156508
1380	C5	GO:BP	GOBP_REGULATION_OF_AUTOPHAGY	EEF1A2	ENSG00000101210
350	C5	GO:BP	GOBP_CHAPERONE_MEDIATED_AUTOPHAGY	GFAP	ENSG00000131095
351	C5	GO:BP	GOBP_CHAPERONE_MEDIATED_AUTOPHAGY	HSP90AA1	ENSG00000080824
352	C5	GO:BP	GOBP_CHAPERONE_MEDIATED_AUTOPHAGY	HSPA8	ENSG00000109971
353	C5	GO:BP	GOBP_CHAPERONE_MEDIATED_AUTOPHAGY	LAMP2	ENSG00000005893
354	C5	GO:BP	GOBP_CHAPERONE_MEDIATED_AUTOPHAGY	PLK3	ENSG00000173846
355	C5	GO:BP	GOBP_CHAPERONE_MEDIATED_AUTOPHAGY	SNCA	ENSG00000145335
356	C5	GO:BP	GOBP_CHAPERONE_MEDIATED_AUTOPHAGY	SNRNP70	ENSG00000104852
357	C5	GO:BP	GOBP_CHAPERONE_MEDIATED_AUTOPHAGY	STUB1	ENSG00000103266
358	C5	GO:BP	GOBP_CHAPERONE_MEDIATED_AUTOPHAGY	SYNPO2	ENSG00000172403
359	C5	GO:BP	GOBP_LATE_NUCLEOPHAGY	ATG2A	ENSG00000110046
360	C5	GO:BP	GOBP_LATE_NUCLEOPHAGY	ATG2B	ENSG00000066739
361	C5	GO:BP	GOBP_LATE_NUCLEOPHAGY	ATG7	ENSG00000197548
362	C5	GO:BP	GOBP_LATE_NUCLEOPHAGY	ATG9A	ENSG00000198925
363	C5	GO:BP	GOBP_LATE_NUCLEOPHAGY	ATG9B	ENSG00000181652
364	C5	GO:BP	GOBP_LATE_NUCLEOPHAGY	ULK1	ENSG00000177169
365	C5	GO:BP	GOBP_LATE_NUCLEOPHAGY	ULK2	ENSG00000083290
366	C5	GO:BP	GOBP_LIPOPHAGY	ADRB2	ENSG00000169252
367	C5	GO:BP	GOBP_LIPOPHAGY	AUP1	ENSG00000115307
368	C5	GO:BP	GOBP_LIPOPHAGY	HTT	ENSG00000197386
369	C5	GO:BP	GOBP_LIPOPHAGY	RAB7A	ENSG00000075785
370	C5	GO:BP	GOBP_LIPOPHAGY	SESN2	ENSG00000130766
371	C5	GO:BP	GOBP_LIPOPHAGY	SESN2	ENSG00000285069
372	C5	GO:BP	GOBP_LIPOPHAGY	SPTLC1	ENSG00000090054
373	C5	GO:BP	GOBP_LIPOPHAGY	SPTLC2	ENSG00000100596
374	C5	GO:BP	GOBP_LYSOSOMAL_MICROAUTOPHAGY	ATG13	ENSG00000175224
375	C5	GO:BP	GOBP_LYSOSOMAL_MICROAUTOPHAGY	ATG16L1	ENSG00000085978
376	C5	GO:BP	GOBP_LYSOSOMAL_MICROAUTOPHAGY	ATG16L1	ENSG00000281089
377	C5	GO:BP	GOBP_LYSOSOMAL_MICROAUTOPHAGY	ATG2A	ENSG00000110046
378	C5	GO:BP	GOBP_LYSOSOMAL_MICROAUTOPHAGY	ATG2B	ENSG00000066739
379	C5	GO:BP	GOBP_LYSOSOMAL_MICROAUTOPHAGY	ATG4B	ENSG00000168397
380	C5	GO:BP	GOBP_LYSOSOMAL_MICROAUTOPHAGY	ATG7	ENSG00000197548
381	C5	GO:BP	GOBP_LYSOSOMAL_MICROAUTOPHAGY	RB1CC1	ENSG00000023287
382	C5	GO:BP	GOBP_LYSOSOMAL_MICROAUTOPHAGY	ULK1	ENSG00000177169
383	C5	GO:BP	GOBP_LYSOSOMAL_MICROAUTOPHAGY	ULK2	ENSG00000083290
384	C5	GO:BP	GOBP_MACROAUTOPHAGY	ACBD5	ENSG00000107897
385	C5	GO:BP	GOBP_MACROAUTOPHAGY	ADPRH	ENSG00000144843
386	C5	GO:BP	GOBP_MACROAUTOPHAGY	ADRB2	ENSG00000169252
387	C5	GO:BP	GOBP_MACROAUTOPHAGY	AKT1	ENSG00000142208
388	C5	GO:BP	GOBP_MACROAUTOPHAGY	AMBRA1	ENSG00000110497
389	C5	GO:BP	GOBP_MACROAUTOPHAGY	AP4M1	ENSG00000221838
390	C5	GO:BP	GOBP_MACROAUTOPHAGY	ARFIP2	ENSG00000132254
391	C5	GO:BP	GOBP_MACROAUTOPHAGY	ARL8B	ENSG00000134108
392	C5	GO:BP	GOBP_MACROAUTOPHAGY	ATG10	ENSG00000152348
393	C5	GO:BP	GOBP_MACROAUTOPHAGY	ATG101	ENSG00000123395
394	C5	GO:BP	GOBP_MACROAUTOPHAGY	ATG12	ENSG00000145782
395	C5	GO:BP	GOBP_MACROAUTOPHAGY	ATG13	ENSG00000175224
396	C5	GO:BP	GOBP_MACROAUTOPHAGY	ATG14	ENSG00000126775
397	C5	GO:BP	GOBP_MACROAUTOPHAGY	ATG16L1	ENSG00000085978
398	C5	GO:BP	GOBP_MACROAUTOPHAGY	ATG16L1	ENSG00000281089
399	C5	GO:BP	GOBP_MACROAUTOPHAGY	ATG16L2	ENSG00000168010
400	C5	GO:BP	GOBP_MACROAUTOPHAGY	ATG2A	ENSG00000110046
401	C5	GO:BP	GOBP_MACROAUTOPHAGY	ATG2B	ENSG00000066739
402	C5	GO:BP	GOBP_MACROAUTOPHAGY	ATG3	ENSG00000144848
403	C5	GO:BP	GOBP_MACROAUTOPHAGY	ATG4B	ENSG00000168397
404	C5	GO:BP	GOBP_MACROAUTOPHAGY	ATG4D	ENSG00000130734
405	C5	GO:BP	GOBP_MACROAUTOPHAGY	ATG5	ENSG00000057663
406	C5	GO:BP	GOBP_MACROAUTOPHAGY	ATG7	ENSG00000197548
407	C5	GO:BP	GOBP_MACROAUTOPHAGY	ATG9A	ENSG00000198925
408	C5	GO:BP	GOBP_MACROAUTOPHAGY	ATG9B	ENSG00000181652
409	C5	GO:BP	GOBP_MACROAUTOPHAGY	ATP13A2	ENSG00000159363
410	C5	GO:BP	GOBP_MACROAUTOPHAGY	ATP2A2	ENSG00000174437
411	C5	GO:BP	GOBP_MACROAUTOPHAGY	ATP6V0A1	ENSG00000033627
412	C5	GO:BP	GOBP_MACROAUTOPHAGY	ATP6V0A2	ENSG00000185344
413	C5	GO:BP	GOBP_MACROAUTOPHAGY	ATP6V0B	ENSG00000117410
414	C5	GO:BP	GOBP_MACROAUTOPHAGY	ATP6V0C	ENSG00000185883
415	C5	GO:BP	GOBP_MACROAUTOPHAGY	ATP6V0D1	ENSG00000159720
416	C5	GO:BP	GOBP_MACROAUTOPHAGY	ATP6V0D2	ENSG00000147614
417	C5	GO:BP	GOBP_MACROAUTOPHAGY	ATP6V0E1	ENSG00000113732
418	C5	GO:BP	GOBP_MACROAUTOPHAGY	ATP6V0E2	ENSG00000171130
419	C5	GO:BP	GOBP_MACROAUTOPHAGY	ATP6V1A	ENSG00000114573
420	C5	GO:BP	GOBP_MACROAUTOPHAGY	ATP6V1B1	ENSG00000116039
421	C5	GO:BP	GOBP_MACROAUTOPHAGY	ATP6V1B2	ENSG00000147416
422	C5	GO:BP	GOBP_MACROAUTOPHAGY	ATP6V1C1	ENSG00000155097
423	C5	GO:BP	GOBP_MACROAUTOPHAGY	ATP6V1C2	ENSG00000143882
424	C5	GO:BP	GOBP_MACROAUTOPHAGY	ATP6V1D	ENSG00000100554
425	C5	GO:BP	GOBP_MACROAUTOPHAGY	ATP6V1E1	ENSG00000131100
426	C5	GO:BP	GOBP_MACROAUTOPHAGY	ATP6V1E2	ENSG00000250565
427	C5	GO:BP	GOBP_MACROAUTOPHAGY	ATP6V1G1	ENSG00000136888
428	C5	GO:BP	GOBP_MACROAUTOPHAGY	ATP6V1G2	ENSG00000206334
429	C5	GO:BP	GOBP_MACROAUTOPHAGY	ATP6V1G2	ENSG00000206445
430	C5	GO:BP	GOBP_MACROAUTOPHAGY	ATP6V1G2	ENSG00000213760
431	C5	GO:BP	GOBP_MACROAUTOPHAGY	ATP6V1G2	ENSG00000226850
432	C5	GO:BP	GOBP_MACROAUTOPHAGY	ATP6V1G2	ENSG00000227587
433	C5	GO:BP	GOBP_MACROAUTOPHAGY	ATP6V1G2	ENSG00000230900
434	C5	GO:BP	GOBP_MACROAUTOPHAGY	ATP6V1G2	ENSG00000234668
435	C5	GO:BP	GOBP_MACROAUTOPHAGY	ATP6V1G2	ENSG00000234920
436	C5	GO:BP	GOBP_MACROAUTOPHAGY	ATP6V1H	ENSG00000047249
437	C5	GO:BP	GOBP_MACROAUTOPHAGY	AUP1	ENSG00000115307
438	C5	GO:BP	GOBP_MACROAUTOPHAGY	BAG3	ENSG00000151929
439	C5	GO:BP	GOBP_MACROAUTOPHAGY	BECN1	ENSG00000126581
440	C5	GO:BP	GOBP_MACROAUTOPHAGY	BECN2	ENSG00000196289
441	C5	GO:BP	GOBP_MACROAUTOPHAGY	BNIP3	ENSG00000176171
442	C5	GO:BP	GOBP_MACROAUTOPHAGY	BNIP3L	ENSG00000104765
443	C5	GO:BP	GOBP_MACROAUTOPHAGY	C5orf51	ENSG00000205765
444	C5	GO:BP	GOBP_MACROAUTOPHAGY	C9orf72	ENSG00000147894
445	C5	GO:BP	GOBP_MACROAUTOPHAGY	CALCOCO2	ENSG00000136436
446	C5	GO:BP	GOBP_MACROAUTOPHAGY	CALM1	ENSG00000198668
447	C5	GO:BP	GOBP_MACROAUTOPHAGY	CAPN1	ENSG00000014216
448	C5	GO:BP	GOBP_MACROAUTOPHAGY	CAPNS1	ENSG00000126247
449	C5	GO:BP	GOBP_MACROAUTOPHAGY	CASP3	ENSG00000164305
450	C5	GO:BP	GOBP_MACROAUTOPHAGY	CDC37	ENSG00000105401
451	C5	GO:BP	GOBP_MACROAUTOPHAGY	CDK5	ENSG00000164885
452	C5	GO:BP	GOBP_MACROAUTOPHAGY	CDK5R1	ENSG00000176749
453	C5	GO:BP	GOBP_MACROAUTOPHAGY	CERS1	ENSG00000223802
454	C5	GO:BP	GOBP_MACROAUTOPHAGY	CHMP1A	ENSG00000131165
455	C5	GO:BP	GOBP_MACROAUTOPHAGY	CHMP1B	ENSG00000255112
456	C5	GO:BP	GOBP_MACROAUTOPHAGY	CHMP2A	ENSG00000130724
457	C5	GO:BP	GOBP_MACROAUTOPHAGY	CHMP2B	ENSG00000083937
458	C5	GO:BP	GOBP_MACROAUTOPHAGY	CHMP3	ENSG00000115561
459	C5	GO:BP	GOBP_MACROAUTOPHAGY	CHMP4A	ENSG00000254505
460	C5	GO:BP	GOBP_MACROAUTOPHAGY	CHMP4A	ENSG00000285302
461	C5	GO:BP	GOBP_MACROAUTOPHAGY	CHMP4B	ENSG00000101421
462	C5	GO:BP	GOBP_MACROAUTOPHAGY	CHMP4C	ENSG00000164695
463	C5	GO:BP	GOBP_MACROAUTOPHAGY	CHMP5	ENSG00000086065
464	C5	GO:BP	GOBP_MACROAUTOPHAGY	CHMP6	ENSG00000176108
465	C5	GO:BP	GOBP_MACROAUTOPHAGY	CHMP7	ENSG00000147457
466	C5	GO:BP	GOBP_MACROAUTOPHAGY	CLEC16A	ENSG00000038532
467	C5	GO:BP	GOBP_MACROAUTOPHAGY	CLN3	ENSG00000188603
468	C5	GO:BP	GOBP_MACROAUTOPHAGY	DCN	ENSG00000011465
469	C5	GO:BP	GOBP_MACROAUTOPHAGY	DDRGK1	ENSG00000198171
470	C5	GO:BP	GOBP_MACROAUTOPHAGY	EHMT2	ENSG00000204371
471	C5	GO:BP	GOBP_MACROAUTOPHAGY	EHMT2	ENSG00000206376
472	C5	GO:BP	GOBP_MACROAUTOPHAGY	EHMT2	ENSG00000224143
473	C5	GO:BP	GOBP_MACROAUTOPHAGY	EHMT2	ENSG00000227333
474	C5	GO:BP	GOBP_MACROAUTOPHAGY	EHMT2	ENSG00000232045
475	C5	GO:BP	GOBP_MACROAUTOPHAGY	EHMT2	ENSG00000236759
476	C5	GO:BP	GOBP_MACROAUTOPHAGY	EHMT2	ENSG00000238134
477	C5	GO:BP	GOBP_MACROAUTOPHAGY	EI24	ENSG00000149547
478	C5	GO:BP	GOBP_MACROAUTOPHAGY	ELAPOR1	ENSG00000116299
479	C5	GO:BP	GOBP_MACROAUTOPHAGY	EMC6	ENSG00000127774
480	C5	GO:BP	GOBP_MACROAUTOPHAGY	EPG5	ENSG00000152223
481	C5	GO:BP	GOBP_MACROAUTOPHAGY	EPM2A	ENSG00000112425
482	C5	GO:BP	GOBP_MACROAUTOPHAGY	ERN1	ENSG00000178607
483	C5	GO:BP	GOBP_MACROAUTOPHAGY	EXOC1	ENSG00000090989
484	C5	GO:BP	GOBP_MACROAUTOPHAGY	EXOC4	ENSG00000131558
485	C5	GO:BP	GOBP_MACROAUTOPHAGY	EXOC7	ENSG00000182473
486	C5	GO:BP	GOBP_MACROAUTOPHAGY	EXOC8	ENSG00000116903
487	C5	GO:BP	GOBP_MACROAUTOPHAGY	FEZ1	ENSG00000149557
488	C5	GO:BP	GOBP_MACROAUTOPHAGY	FEZ2	ENSG00000171055
489	C5	GO:BP	GOBP_MACROAUTOPHAGY	FYCO1	ENSG00000163820
490	C5	GO:BP	GOBP_MACROAUTOPHAGY	GABARAP	ENSG00000170296
491	C5	GO:BP	GOBP_MACROAUTOPHAGY	GABARAPL1	ENSG00000139112
492	C5	GO:BP	GOBP_MACROAUTOPHAGY	GABARAPL2	ENSG00000034713
493	C5	GO:BP	GOBP_MACROAUTOPHAGY	GABARAPL3	ENSG00000238244
494	C5	GO:BP	GOBP_MACROAUTOPHAGY	GABARAPL3	ENSG00000279980
495	C5	GO:BP	GOBP_MACROAUTOPHAGY	GAPDH	ENSG00000111640
496	C5	GO:BP	GOBP_MACROAUTOPHAGY	GBA	ENSG00000177628
497	C5	GO:BP	GOBP_MACROAUTOPHAGY	GBA	ENSG00000262446
498	C5	GO:BP	GOBP_MACROAUTOPHAGY	GNAI3	ENSG00000065135
499	C5	GO:BP	GOBP_MACROAUTOPHAGY	GPSM1	ENSG00000160360
500	C5	GO:BP	GOBP_MACROAUTOPHAGY	HDAC10	ENSG00000100429
501	C5	GO:BP	GOBP_MACROAUTOPHAGY	HDAC6	ENSG00000094631
502	C5	GO:BP	GOBP_MACROAUTOPHAGY	HGS	ENSG00000185359
503	C5	GO:BP	GOBP_MACROAUTOPHAGY	HIF1A	ENSG00000100644
504	C5	GO:BP	GOBP_MACROAUTOPHAGY	HMOX1	ENSG00000100292
505	C5	GO:BP	GOBP_MACROAUTOPHAGY	HSPB8	ENSG00000152137
506	C5	GO:BP	GOBP_MACROAUTOPHAGY	HTRA2	ENSG00000115317
507	C5	GO:BP	GOBP_MACROAUTOPHAGY	HTT	ENSG00000197386
508	C5	GO:BP	GOBP_MACROAUTOPHAGY	HUWE1	ENSG00000086758
509	C5	GO:BP	GOBP_MACROAUTOPHAGY	IFT20	ENSG00000109083
510	C5	GO:BP	GOBP_MACROAUTOPHAGY	IFT88	ENSG00000032742
511	C5	GO:BP	GOBP_MACROAUTOPHAGY	IKBKG	ENSG00000269335
512	C5	GO:BP	GOBP_MACROAUTOPHAGY	IL4	ENSG00000113520
513	C5	GO:BP	GOBP_MACROAUTOPHAGY	ILRUN	ENSG00000196821
514	C5	GO:BP	GOBP_MACROAUTOPHAGY	IRGM	ENSG00000237693
515	C5	GO:BP	GOBP_MACROAUTOPHAGY	KDR	ENSG00000128052
516	C5	GO:BP	GOBP_MACROAUTOPHAGY	KLHL3	ENSG00000146021
517	C5	GO:BP	GOBP_MACROAUTOPHAGY	LACRT	ENSG00000135413
518	C5	GO:BP	GOBP_MACROAUTOPHAGY	LAMP2	ENSG00000005893
519	C5	GO:BP	GOBP_MACROAUTOPHAGY	LARP1	ENSG00000155506
520	C5	GO:BP	GOBP_MACROAUTOPHAGY	LGALS8	ENSG00000116977
521	C5	GO:BP	GOBP_MACROAUTOPHAGY	LIX1	ENSG00000145721
522	C5	GO:BP	GOBP_MACROAUTOPHAGY	LIX1L	ENSG00000271601
523	C5	GO:BP	GOBP_MACROAUTOPHAGY	LRBA	ENSG00000198589
524	C5	GO:BP	GOBP_MACROAUTOPHAGY	LRRK2	ENSG00000188906
525	C5	GO:BP	GOBP_MACROAUTOPHAGY	LRSAM1	ENSG00000148356
526	C5	GO:BP	GOBP_MACROAUTOPHAGY	LZTS1	ENSG00000061337
527	C5	GO:BP	GOBP_MACROAUTOPHAGY	MAP1LC3A	ENSG00000101460
528	C5	GO:BP	GOBP_MACROAUTOPHAGY	MAP1LC3B	ENSG00000140941
529	C5	GO:BP	GOBP_MACROAUTOPHAGY	MAP1LC3B2	ENSG00000258102
530	C5	GO:BP	GOBP_MACROAUTOPHAGY	MAP1LC3C	ENSG00000197769
531	C5	GO:BP	GOBP_MACROAUTOPHAGY	MAP3K7	ENSG00000135341
532	C5	GO:BP	GOBP_MACROAUTOPHAGY	MAPK3	ENSG00000102882
533	C5	GO:BP	GOBP_MACROAUTOPHAGY	MAPK8	ENSG00000107643
534	C5	GO:BP	GOBP_MACROAUTOPHAGY	MCOLN1	ENSG00000090674
535	C5	GO:BP	GOBP_MACROAUTOPHAGY	MFN2	ENSG00000116688
536	C5	GO:BP	GOBP_MACROAUTOPHAGY	MFSD8	ENSG00000164073
537	C5	GO:BP	GOBP_MACROAUTOPHAGY	MOAP1	ENSG00000165943
538	C5	GO:BP	GOBP_MACROAUTOPHAGY	MOAP1	ENSG00000278268
539	C5	GO:BP	GOBP_MACROAUTOPHAGY	MTM1	ENSG00000171100
540	C5	GO:BP	GOBP_MACROAUTOPHAGY	MTMR14	ENSG00000163719
541	C5	GO:BP	GOBP_MACROAUTOPHAGY	MTMR3	ENSG00000100330
542	C5	GO:BP	GOBP_MACROAUTOPHAGY	MTMR8	ENSG00000102043
543	C5	GO:BP	GOBP_MACROAUTOPHAGY	MTOR	ENSG00000198793
544	C5	GO:BP	GOBP_MACROAUTOPHAGY	MVB12A	ENSG00000141971
545	C5	GO:BP	GOBP_MACROAUTOPHAGY	NBR1	ENSG00000188554
546	C5	GO:BP	GOBP_MACROAUTOPHAGY	NEDD4	ENSG00000069869
547	C5	GO:BP	GOBP_MACROAUTOPHAGY	NOD1	ENSG00000106100
548	C5	GO:BP	GOBP_MACROAUTOPHAGY	NOD2	ENSG00000167207
549	C5	GO:BP	GOBP_MACROAUTOPHAGY	NPC1	ENSG00000141458
550	C5	GO:BP	GOBP_MACROAUTOPHAGY	NRBP2	ENSG00000185189
551	C5	GO:BP	GOBP_MACROAUTOPHAGY	NSFL1C	ENSG00000088833
1729	C5	GO:BP	GOBP_REGULATION_OF_CHAPERONE_MEDIATED_AUTOPHAGY	EEF1A2	ENSG00000101210
553	C5	GO:BP	GOBP_MACROAUTOPHAGY	OPTN	ENSG00000123240
554	C5	GO:BP	GOBP_MACROAUTOPHAGY	PACS2	ENSG00000179364
555	C5	GO:BP	GOBP_MACROAUTOPHAGY	PAFAH1B2	ENSG00000168092
556	C5	GO:BP	GOBP_MACROAUTOPHAGY	PGAM5	ENSG00000247077
557	C5	GO:BP	GOBP_MACROAUTOPHAGY	PHB2	ENSG00000215021
558	C5	GO:BP	GOBP_MACROAUTOPHAGY	PHF23	ENSG00000040633
559	C5	GO:BP	GOBP_MACROAUTOPHAGY	PIK3C3	ENSG00000078142
560	C5	GO:BP	GOBP_MACROAUTOPHAGY	PIK3CA	ENSG00000121879
561	C5	GO:BP	GOBP_MACROAUTOPHAGY	PIK3R4	ENSG00000196455
562	C5	GO:BP	GOBP_MACROAUTOPHAGY	PIKFYVE	ENSG00000115020
563	C5	GO:BP	GOBP_MACROAUTOPHAGY	PINK1	ENSG00000158828
564	C5	GO:BP	GOBP_MACROAUTOPHAGY	PIP4K2A	ENSG00000150867
565	C5	GO:BP	GOBP_MACROAUTOPHAGY	PIP4K2B	ENSG00000276293
566	C5	GO:BP	GOBP_MACROAUTOPHAGY	PIP4K2B	ENSG00000277292
567	C5	GO:BP	GOBP_MACROAUTOPHAGY	PIP4K2C	ENSG00000166908
568	C5	GO:BP	GOBP_MACROAUTOPHAGY	PJVK	ENSG00000204311
569	C5	GO:BP	GOBP_MACROAUTOPHAGY	PLAA	ENSG00000137055
570	C5	GO:BP	GOBP_MACROAUTOPHAGY	PLEKHM1	ENSG00000225190
571	C5	GO:BP	GOBP_MACROAUTOPHAGY	PLEKHM1	ENSG00000276358
572	C5	GO:BP	GOBP_MACROAUTOPHAGY	PLEKHM1	ENSG00000277111
573	C5	GO:BP	GOBP_MACROAUTOPHAGY	POLDIP2	ENSG00000004142
2324	C2	CGP	KUMAR_AUTOPHAGY_NETWORK	KRBA1	ENSG00000133619
575	C5	GO:BP	GOBP_MACROAUTOPHAGY	PRKACA	ENSG00000072062
576	C5	GO:BP	GOBP_MACROAUTOPHAGY	PRKACA	ENSG00000288516
577	C5	GO:BP	GOBP_MACROAUTOPHAGY	PRKN	ENSG00000185345
578	C5	GO:BP	GOBP_MACROAUTOPHAGY	PSEN1	ENSG00000080815
579	C5	GO:BP	GOBP_MACROAUTOPHAGY	QSOX1	ENSG00000116260
580	C5	GO:BP	GOBP_MACROAUTOPHAGY	RAB19	ENSG00000146955
581	C5	GO:BP	GOBP_MACROAUTOPHAGY	RAB1A	ENSG00000138069
582	C5	GO:BP	GOBP_MACROAUTOPHAGY	RAB1B	ENSG00000174903
583	C5	GO:BP	GOBP_MACROAUTOPHAGY	RAB1C	ENSG00000233111
584	C5	GO:BP	GOBP_MACROAUTOPHAGY	RAB23	ENSG00000112210
585	C5	GO:BP	GOBP_MACROAUTOPHAGY	RAB33B	ENSG00000172007
586	C5	GO:BP	GOBP_MACROAUTOPHAGY	RAB3GAP1	ENSG00000115839
587	C5	GO:BP	GOBP_MACROAUTOPHAGY	RAB3GAP2	ENSG00000118873
588	C5	GO:BP	GOBP_MACROAUTOPHAGY	RAB43	ENSG00000172780
589	C5	GO:BP	GOBP_MACROAUTOPHAGY	RAB5A	ENSG00000144566
590	C5	GO:BP	GOBP_MACROAUTOPHAGY	RAB7A	ENSG00000075785
591	C5	GO:BP	GOBP_MACROAUTOPHAGY	RALB	ENSG00000144118
592	C5	GO:BP	GOBP_MACROAUTOPHAGY	RB1CC1	ENSG00000023287
593	C5	GO:BP	GOBP_MACROAUTOPHAGY	RETREG1	ENSG00000154153
594	C5	GO:BP	GOBP_MACROAUTOPHAGY	RETREG3	ENSG00000141699
595	C5	GO:BP	GOBP_MACROAUTOPHAGY	RHEB	ENSG00000106615
596	C5	GO:BP	GOBP_MACROAUTOPHAGY	RIPK2	ENSG00000104312
597	C5	GO:BP	GOBP_MACROAUTOPHAGY	RNF213	ENSG00000173821
598	C5	GO:BP	GOBP_MACROAUTOPHAGY	RNF31	ENSG00000092098
599	C5	GO:BP	GOBP_MACROAUTOPHAGY	RNF31	ENSG00000285152
600	C5	GO:BP	GOBP_MACROAUTOPHAGY	RNF41	ENSG00000181852
601	C5	GO:BP	GOBP_MACROAUTOPHAGY	RNF5	ENSG00000183574
602	C5	GO:BP	GOBP_MACROAUTOPHAGY	RNF5	ENSG00000204308
603	C5	GO:BP	GOBP_MACROAUTOPHAGY	RNF5	ENSG00000223767
604	C5	GO:BP	GOBP_MACROAUTOPHAGY	RNF5	ENSG00000225452
605	C5	GO:BP	GOBP_MACROAUTOPHAGY	RNF5	ENSG00000227277
606	C5	GO:BP	GOBP_MACROAUTOPHAGY	RNF5	ENSG00000228405
607	C5	GO:BP	GOBP_MACROAUTOPHAGY	RNF5	ENSG00000228907
608	C5	GO:BP	GOBP_MACROAUTOPHAGY	RUBCN	ENSG00000145016
609	C5	GO:BP	GOBP_MACROAUTOPHAGY	RUBCNL	ENSG00000102445
610	C5	GO:BP	GOBP_MACROAUTOPHAGY	RUFY4	ENSG00000188282
611	C5	GO:BP	GOBP_MACROAUTOPHAGY	SCFD1	ENSG00000092108
612	C5	GO:BP	GOBP_MACROAUTOPHAGY	SCOC	ENSG00000153130
613	C5	GO:BP	GOBP_MACROAUTOPHAGY	SEC22B	ENSG00000265808
614	C5	GO:BP	GOBP_MACROAUTOPHAGY	SESN1	ENSG00000080546
615	C5	GO:BP	GOBP_MACROAUTOPHAGY	SESN2	ENSG00000130766
616	C5	GO:BP	GOBP_MACROAUTOPHAGY	SESN2	ENSG00000285069
617	C5	GO:BP	GOBP_MACROAUTOPHAGY	SESN3	ENSG00000149212
618	C5	GO:BP	GOBP_MACROAUTOPHAGY	SH3GLB1	ENSG00000097033
619	C5	GO:BP	GOBP_MACROAUTOPHAGY	SIRT1	ENSG00000096717
620	C5	GO:BP	GOBP_MACROAUTOPHAGY	SLC25A4	ENSG00000151729
621	C5	GO:BP	GOBP_MACROAUTOPHAGY	SLC25A5	ENSG00000005022
622	C5	GO:BP	GOBP_MACROAUTOPHAGY	SMCR8	ENSG00000176994
623	C5	GO:BP	GOBP_MACROAUTOPHAGY	SMCR8	ENSG00000283741
624	C5	GO:BP	GOBP_MACROAUTOPHAGY	SMG1	ENSG00000157106
625	C5	GO:BP	GOBP_MACROAUTOPHAGY	SMURF1	ENSG00000198742
626	C5	GO:BP	GOBP_MACROAUTOPHAGY	SMURF1	ENSG00000284126
627	C5	GO:BP	GOBP_MACROAUTOPHAGY	SNAP29	ENSG00000099940
628	C5	GO:BP	GOBP_MACROAUTOPHAGY	SNAPIN	ENSG00000143553
629	C5	GO:BP	GOBP_MACROAUTOPHAGY	SNF8	ENSG00000159210
630	C5	GO:BP	GOBP_MACROAUTOPHAGY	SNX14	ENSG00000135317
631	C5	GO:BP	GOBP_MACROAUTOPHAGY	SNX18	ENSG00000178996
632	C5	GO:BP	GOBP_MACROAUTOPHAGY	SNX30	ENSG00000148158
633	C5	GO:BP	GOBP_MACROAUTOPHAGY	SNX32	ENSG00000172803
634	C5	GO:BP	GOBP_MACROAUTOPHAGY	SNX4	ENSG00000114520
635	C5	GO:BP	GOBP_MACROAUTOPHAGY	SNX5	ENSG00000089006
636	C5	GO:BP	GOBP_MACROAUTOPHAGY	SNX6	ENSG00000129515
637	C5	GO:BP	GOBP_MACROAUTOPHAGY	SNX7	ENSG00000162627
638	C5	GO:BP	GOBP_MACROAUTOPHAGY	SPTLC1	ENSG00000090054
639	C5	GO:BP	GOBP_MACROAUTOPHAGY	SPTLC2	ENSG00000100596
640	C5	GO:BP	GOBP_MACROAUTOPHAGY	SQSTM1	ENSG00000161011
641	C5	GO:BP	GOBP_MACROAUTOPHAGY	SQSTM1	ENSG00000284099
642	C5	GO:BP	GOBP_MACROAUTOPHAGY	SRC	ENSG00000197122
643	C5	GO:BP	GOBP_MACROAUTOPHAGY	STAM	ENSG00000136738
644	C5	GO:BP	GOBP_MACROAUTOPHAGY	STAM2	ENSG00000115145
645	C5	GO:BP	GOBP_MACROAUTOPHAGY	STBD1	ENSG00000118804
646	C5	GO:BP	GOBP_MACROAUTOPHAGY	STING1	ENSG00000184584
647	C5	GO:BP	GOBP_MACROAUTOPHAGY	STING1	ENSG00000288243
648	C5	GO:BP	GOBP_MACROAUTOPHAGY	STX12	ENSG00000117758
649	C5	GO:BP	GOBP_MACROAUTOPHAGY	STX17	ENSG00000136874
650	C5	GO:BP	GOBP_MACROAUTOPHAGY	SUPT5H	ENSG00000196235
651	C5	GO:BP	GOBP_MACROAUTOPHAGY	SYNPO2	ENSG00000172403
652	C5	GO:BP	GOBP_MACROAUTOPHAGY	TAFAZZIN	ENSG00000102125
653	C5	GO:BP	GOBP_MACROAUTOPHAGY	TBC1D12	ENSG00000108239
654	C5	GO:BP	GOBP_MACROAUTOPHAGY	TBC1D14	ENSG00000132405
655	C5	GO:BP	GOBP_MACROAUTOPHAGY	TBC1D25	ENSG00000068354
656	C5	GO:BP	GOBP_MACROAUTOPHAGY	TBC1D5	ENSG00000131374
657	C5	GO:BP	GOBP_MACROAUTOPHAGY	TBK1	ENSG00000183735
658	C5	GO:BP	GOBP_MACROAUTOPHAGY	TCIRG1	ENSG00000110719
659	C5	GO:BP	GOBP_MACROAUTOPHAGY	TECPR1	ENSG00000205356
660	C5	GO:BP	GOBP_MACROAUTOPHAGY	TEX264	ENSG00000164081
661	C5	GO:BP	GOBP_MACROAUTOPHAGY	TIGAR	ENSG00000078237
662	C5	GO:BP	GOBP_MACROAUTOPHAGY	TMEM39A	ENSG00000176142
663	C5	GO:BP	GOBP_MACROAUTOPHAGY	TMEM41B	ENSG00000166471
664	C5	GO:BP	GOBP_MACROAUTOPHAGY	TMEM74	ENSG00000164841
665	C5	GO:BP	GOBP_MACROAUTOPHAGY	TOMM7	ENSG00000196683
666	C5	GO:BP	GOBP_MACROAUTOPHAGY	TP53	ENSG00000141510
1469	C5	GO:BP	GOBP_REGULATION_OF_AUTOPHAGY	MAPT	ENSG00000186868
668	C5	GO:BP	GOBP_MACROAUTOPHAGY	TP53INP2	ENSG00000078804
669	C5	GO:BP	GOBP_MACROAUTOPHAGY	TRAPPC8	ENSG00000153339
670	C5	GO:BP	GOBP_MACROAUTOPHAGY	TRIM13	ENSG00000204977
671	C5	GO:BP	GOBP_MACROAUTOPHAGY	TSC1	ENSG00000165699
672	C5	GO:BP	GOBP_MACROAUTOPHAGY	TSC2	ENSG00000103197
673	C5	GO:BP	GOBP_MACROAUTOPHAGY	TSG101	ENSG00000074319
674	C5	GO:BP	GOBP_MACROAUTOPHAGY	UBA5	ENSG00000081307
675	C5	GO:BP	GOBP_MACROAUTOPHAGY	UBQLN1	ENSG00000135018
676	C5	GO:BP	GOBP_MACROAUTOPHAGY	UBQLN2	ENSG00000188021
677	C5	GO:BP	GOBP_MACROAUTOPHAGY	UBQLN4	ENSG00000160803
678	C5	GO:BP	GOBP_MACROAUTOPHAGY	UBXN2A	ENSG00000173960
679	C5	GO:BP	GOBP_MACROAUTOPHAGY	UBXN2B	ENSG00000215114
680	C5	GO:BP	GOBP_MACROAUTOPHAGY	UBXN6	ENSG00000167671
681	C5	GO:BP	GOBP_MACROAUTOPHAGY	UCHL1	ENSG00000154277
682	C5	GO:BP	GOBP_MACROAUTOPHAGY	UFC1	ENSG00000143222
683	C5	GO:BP	GOBP_MACROAUTOPHAGY	UFL1	ENSG00000014123
684	C5	GO:BP	GOBP_MACROAUTOPHAGY	UFM1	ENSG00000120686
685	C5	GO:BP	GOBP_MACROAUTOPHAGY	ULK1	ENSG00000177169
686	C5	GO:BP	GOBP_MACROAUTOPHAGY	ULK2	ENSG00000083290
687	C5	GO:BP	GOBP_MACROAUTOPHAGY	ULK3	ENSG00000140474
688	C5	GO:BP	GOBP_MACROAUTOPHAGY	USP30	ENSG00000135093
689	C5	GO:BP	GOBP_MACROAUTOPHAGY	USP36	ENSG00000055483
690	C5	GO:BP	GOBP_MACROAUTOPHAGY	UVRAG	ENSG00000198382
691	C5	GO:BP	GOBP_MACROAUTOPHAGY	VAMP7	ENSG00000124333
692	C5	GO:BP	GOBP_MACROAUTOPHAGY	VAMP8	ENSG00000118640
693	C5	GO:BP	GOBP_MACROAUTOPHAGY	VCP	ENSG00000165280
694	C5	GO:BP	GOBP_MACROAUTOPHAGY	VDAC1	ENSG00000213585
695	C5	GO:BP	GOBP_MACROAUTOPHAGY	VIPAS39	ENSG00000151445
696	C5	GO:BP	GOBP_MACROAUTOPHAGY	VMP1	ENSG00000062716
697	C5	GO:BP	GOBP_MACROAUTOPHAGY	VPS13C	ENSG00000129003
698	C5	GO:BP	GOBP_MACROAUTOPHAGY	VPS13D	ENSG00000048707
699	C5	GO:BP	GOBP_MACROAUTOPHAGY	VPS16	ENSG00000215305
700	C5	GO:BP	GOBP_MACROAUTOPHAGY	VPS25	ENSG00000131475
701	C5	GO:BP	GOBP_MACROAUTOPHAGY	VPS26A	ENSG00000122958
702	C5	GO:BP	GOBP_MACROAUTOPHAGY	VPS26B	ENSG00000151502
703	C5	GO:BP	GOBP_MACROAUTOPHAGY	VPS28	ENSG00000160948
704	C5	GO:BP	GOBP_MACROAUTOPHAGY	VPS28	ENSG00000285339
705	C5	GO:BP	GOBP_MACROAUTOPHAGY	VPS33A	ENSG00000139719
706	C5	GO:BP	GOBP_MACROAUTOPHAGY	VPS33B	ENSG00000184056
707	C5	GO:BP	GOBP_MACROAUTOPHAGY	VPS35	ENSG00000069329
708	C5	GO:BP	GOBP_MACROAUTOPHAGY	VPS36	ENSG00000136100
709	C5	GO:BP	GOBP_MACROAUTOPHAGY	VPS37A	ENSG00000155975
710	C5	GO:BP	GOBP_MACROAUTOPHAGY	VPS37B	ENSG00000139722
711	C5	GO:BP	GOBP_MACROAUTOPHAGY	VPS37C	ENSG00000167987
712	C5	GO:BP	GOBP_MACROAUTOPHAGY	VPS37D	ENSG00000176428
713	C5	GO:BP	GOBP_MACROAUTOPHAGY	VPS39	ENSG00000166887
714	C5	GO:BP	GOBP_MACROAUTOPHAGY	VPS41	ENSG00000006715
715	C5	GO:BP	GOBP_MACROAUTOPHAGY	VPS4A	ENSG00000132612
716	C5	GO:BP	GOBP_MACROAUTOPHAGY	VPS4B	ENSG00000119541
717	C5	GO:BP	GOBP_MACROAUTOPHAGY	VTA1	ENSG00000009844
718	C5	GO:BP	GOBP_MACROAUTOPHAGY	VTI1A	ENSG00000151532
719	C5	GO:BP	GOBP_MACROAUTOPHAGY	VTI1B	ENSG00000100568
720	C5	GO:BP	GOBP_MACROAUTOPHAGY	WAC	ENSG00000095787
721	C5	GO:BP	GOBP_MACROAUTOPHAGY	WDFY3	ENSG00000163625
722	C5	GO:BP	GOBP_MACROAUTOPHAGY	WDR45	ENSG00000188378
723	C5	GO:BP	GOBP_MACROAUTOPHAGY	WDR45	ENSG00000196998
724	C5	GO:BP	GOBP_MACROAUTOPHAGY	WDR45B	ENSG00000141580
725	C5	GO:BP	GOBP_MACROAUTOPHAGY	WDR81	ENSG00000167716
726	C5	GO:BP	GOBP_MACROAUTOPHAGY	WDR81	ENSG00000276021
727	C5	GO:BP	GOBP_MACROAUTOPHAGY	WIPI1	ENSG00000070540
728	C5	GO:BP	GOBP_MACROAUTOPHAGY	WIPI2	ENSG00000157954
729	C5	GO:BP	GOBP_MACROAUTOPHAGY	YOD1	ENSG00000180667
730	C5	GO:BP	GOBP_MACROAUTOPHAGY	ZFYVE1	ENSG00000165861
731	C5	GO:BP	GOBP_MITOPHAGY	AMBRA1	ENSG00000110497
732	C5	GO:BP	GOBP_MITOPHAGY	ARFIP2	ENSG00000132254
733	C5	GO:BP	GOBP_MITOPHAGY	ATG13	ENSG00000175224
734	C5	GO:BP	GOBP_MITOPHAGY	ATG14	ENSG00000126775
735	C5	GO:BP	GOBP_MITOPHAGY	ATG4B	ENSG00000168397
736	C5	GO:BP	GOBP_MITOPHAGY	ATG4D	ENSG00000130734
737	C5	GO:BP	GOBP_MITOPHAGY	BECN1	ENSG00000126581
738	C5	GO:BP	GOBP_MITOPHAGY	C5orf51	ENSG00000205765
739	C5	GO:BP	GOBP_MITOPHAGY	CDC37	ENSG00000105401
740	C5	GO:BP	GOBP_MITOPHAGY	CERS1	ENSG00000223802
741	C5	GO:BP	GOBP_MITOPHAGY	HDAC6	ENSG00000094631
742	C5	GO:BP	GOBP_MITOPHAGY	HTRA2	ENSG00000115317
743	C5	GO:BP	GOBP_MITOPHAGY	HUWE1	ENSG00000086758
744	C5	GO:BP	GOBP_MITOPHAGY	LRBA	ENSG00000198589
745	C5	GO:BP	GOBP_MITOPHAGY	MAP1LC3B	ENSG00000140941
746	C5	GO:BP	GOBP_MITOPHAGY	MFN2	ENSG00000116688
747	C5	GO:BP	GOBP_MITOPHAGY	OPTN	ENSG00000123240
748	C5	GO:BP	GOBP_MITOPHAGY	PHB2	ENSG00000215021
749	C5	GO:BP	GOBP_MITOPHAGY	PINK1	ENSG00000158828
750	C5	GO:BP	GOBP_MITOPHAGY	PRKN	ENSG00000185345
751	C5	GO:BP	GOBP_MITOPHAGY	RETREG1	ENSG00000154153
752	C5	GO:BP	GOBP_MITOPHAGY	RNF41	ENSG00000181852
753	C5	GO:BP	GOBP_MITOPHAGY	SLC25A4	ENSG00000151729
754	C5	GO:BP	GOBP_MITOPHAGY	SLC25A5	ENSG00000005022
755	C5	GO:BP	GOBP_MITOPHAGY	SQSTM1	ENSG00000161011
756	C5	GO:BP	GOBP_MITOPHAGY	SQSTM1	ENSG00000284099
757	C5	GO:BP	GOBP_MITOPHAGY	TAFAZZIN	ENSG00000102125
758	C5	GO:BP	GOBP_MITOPHAGY	TIGAR	ENSG00000078237
759	C5	GO:BP	GOBP_MITOPHAGY	TOMM7	ENSG00000196683
760	C5	GO:BP	GOBP_MITOPHAGY	TP53	ENSG00000141510
761	C5	GO:BP	GOBP_MITOPHAGY	TSC2	ENSG00000103197
762	C5	GO:BP	GOBP_MITOPHAGY	USP30	ENSG00000135093
763	C5	GO:BP	GOBP_MITOPHAGY	VDAC1	ENSG00000213585
764	C5	GO:BP	GOBP_MITOPHAGY	VPS13C	ENSG00000129003
765	C5	GO:BP	GOBP_MITOPHAGY	VPS13D	ENSG00000048707
766	C5	GO:BP	GOBP_NEGATIVE_REGULATION_OF_AUTOPHAGOSOME_ASSEMBLY	BECN1	ENSG00000126581
767	C5	GO:BP	GOBP_NEGATIVE_REGULATION_OF_AUTOPHAGOSOME_ASSEMBLY	CHMP4A	ENSG00000254505
768	C5	GO:BP	GOBP_NEGATIVE_REGULATION_OF_AUTOPHAGOSOME_ASSEMBLY	CHMP4A	ENSG00000285302
769	C5	GO:BP	GOBP_NEGATIVE_REGULATION_OF_AUTOPHAGOSOME_ASSEMBLY	CHMP4B	ENSG00000101421
770	C5	GO:BP	GOBP_NEGATIVE_REGULATION_OF_AUTOPHAGOSOME_ASSEMBLY	EHMT2	ENSG00000204371
771	C5	GO:BP	GOBP_NEGATIVE_REGULATION_OF_AUTOPHAGOSOME_ASSEMBLY	EHMT2	ENSG00000206376
772	C5	GO:BP	GOBP_NEGATIVE_REGULATION_OF_AUTOPHAGOSOME_ASSEMBLY	EHMT2	ENSG00000224143
773	C5	GO:BP	GOBP_NEGATIVE_REGULATION_OF_AUTOPHAGOSOME_ASSEMBLY	EHMT2	ENSG00000227333
774	C5	GO:BP	GOBP_NEGATIVE_REGULATION_OF_AUTOPHAGOSOME_ASSEMBLY	EHMT2	ENSG00000232045
775	C5	GO:BP	GOBP_NEGATIVE_REGULATION_OF_AUTOPHAGOSOME_ASSEMBLY	EHMT2	ENSG00000236759
776	C5	GO:BP	GOBP_NEGATIVE_REGULATION_OF_AUTOPHAGOSOME_ASSEMBLY	EHMT2	ENSG00000238134
777	C5	GO:BP	GOBP_NEGATIVE_REGULATION_OF_AUTOPHAGOSOME_ASSEMBLY	FEZ1	ENSG00000149557
778	C5	GO:BP	GOBP_NEGATIVE_REGULATION_OF_AUTOPHAGOSOME_ASSEMBLY	FEZ2	ENSG00000171055
779	C5	GO:BP	GOBP_NEGATIVE_REGULATION_OF_AUTOPHAGOSOME_ASSEMBLY	LRRK2	ENSG00000188906
780	C5	GO:BP	GOBP_NEGATIVE_REGULATION_OF_AUTOPHAGOSOME_ASSEMBLY	MTM1	ENSG00000171100
1470	C5	GO:BP	GOBP_REGULATION_OF_AUTOPHAGY	MAPT	ENSG00000276155
782	C5	GO:BP	GOBP_NEGATIVE_REGULATION_OF_AUTOPHAGOSOME_ASSEMBLY	PHF23	ENSG00000040633
783	C5	GO:BP	GOBP_NEGATIVE_REGULATION_OF_AUTOPHAGOSOME_ASSEMBLY	PINK1	ENSG00000158828
784	C5	GO:BP	GOBP_NEGATIVE_REGULATION_OF_AUTOPHAGOSOME_ASSEMBLY	SCFD1	ENSG00000092108
785	C5	GO:BP	GOBP_NEGATIVE_REGULATION_OF_AUTOPHAGOSOME_ASSEMBLY	SEC22B	ENSG00000265808
786	C5	GO:BP	GOBP_NEGATIVE_REGULATION_OF_AUTOPHAGOSOME_ASSEMBLY	SMCR8	ENSG00000176994
787	C5	GO:BP	GOBP_NEGATIVE_REGULATION_OF_AUTOPHAGOSOME_ASSEMBLY	SMCR8	ENSG00000283741
788	C5	GO:BP	GOBP_NEGATIVE_REGULATION_OF_AUTOPHAGOSOME_ASSEMBLY	TMEM39A	ENSG00000176142
789	C5	GO:BP	GOBP_NEGATIVE_REGULATION_OF_AUTOPHAGOSOME_MATURATION	CLEC16A	ENSG00000038532
790	C5	GO:BP	GOBP_NEGATIVE_REGULATION_OF_AUTOPHAGOSOME_MATURATION	PHF23	ENSG00000040633
791	C5	GO:BP	GOBP_NEGATIVE_REGULATION_OF_AUTOPHAGOSOME_MATURATION	RUBCN	ENSG00000145016
792	C5	GO:BP	GOBP_NEGATIVE_REGULATION_OF_AUTOPHAGOSOME_MATURATION	TMEM39A	ENSG00000176142
793	C5	GO:BP	GOBP_NEGATIVE_REGULATION_OF_AUTOPHAGOSOME_MATURATION	UBQLN4	ENSG00000160803
794	C5	GO:BP	GOBP_NEGATIVE_REGULATION_OF_AUTOPHAGY	ADRA1A	ENSG00000120907
795	C5	GO:BP	GOBP_NEGATIVE_REGULATION_OF_AUTOPHAGY	AKT1	ENSG00000142208
796	C5	GO:BP	GOBP_NEGATIVE_REGULATION_OF_AUTOPHAGY	ATG7	ENSG00000197548
797	C5	GO:BP	GOBP_NEGATIVE_REGULATION_OF_AUTOPHAGY	BCL2	ENSG00000171791
798	C5	GO:BP	GOBP_NEGATIVE_REGULATION_OF_AUTOPHAGY	BECN1	ENSG00000126581
799	C5	GO:BP	GOBP_NEGATIVE_REGULATION_OF_AUTOPHAGY	BMF	ENSG00000104081
800	C5	GO:BP	GOBP_NEGATIVE_REGULATION_OF_AUTOPHAGY	CHMP4A	ENSG00000254505
801	C5	GO:BP	GOBP_NEGATIVE_REGULATION_OF_AUTOPHAGY	CHMP4A	ENSG00000285302
802	C5	GO:BP	GOBP_NEGATIVE_REGULATION_OF_AUTOPHAGY	CHMP4B	ENSG00000101421
803	C5	GO:BP	GOBP_NEGATIVE_REGULATION_OF_AUTOPHAGY	CLEC16A	ENSG00000038532
804	C5	GO:BP	GOBP_NEGATIVE_REGULATION_OF_AUTOPHAGY	CPTP	ENSG00000224051
805	C5	GO:BP	GOBP_NEGATIVE_REGULATION_OF_AUTOPHAGY	CTSA	ENSG00000064601
806	C5	GO:BP	GOBP_NEGATIVE_REGULATION_OF_AUTOPHAGY	DAP	ENSG00000112977
807	C5	GO:BP	GOBP_NEGATIVE_REGULATION_OF_AUTOPHAGY	DAPL1	ENSG00000163331
808	C5	GO:BP	GOBP_NEGATIVE_REGULATION_OF_AUTOPHAGY	EHMT2	ENSG00000204371
809	C5	GO:BP	GOBP_NEGATIVE_REGULATION_OF_AUTOPHAGY	EHMT2	ENSG00000206376
810	C5	GO:BP	GOBP_NEGATIVE_REGULATION_OF_AUTOPHAGY	EHMT2	ENSG00000224143
811	C5	GO:BP	GOBP_NEGATIVE_REGULATION_OF_AUTOPHAGY	EHMT2	ENSG00000227333
812	C5	GO:BP	GOBP_NEGATIVE_REGULATION_OF_AUTOPHAGY	EHMT2	ENSG00000232045
813	C5	GO:BP	GOBP_NEGATIVE_REGULATION_OF_AUTOPHAGY	EHMT2	ENSG00000236759
814	C5	GO:BP	GOBP_NEGATIVE_REGULATION_OF_AUTOPHAGY	EHMT2	ENSG00000238134
815	C5	GO:BP	GOBP_NEGATIVE_REGULATION_OF_AUTOPHAGY	EIF4E	ENSG00000151247
816	C5	GO:BP	GOBP_NEGATIVE_REGULATION_OF_AUTOPHAGY	EIF4G1	ENSG00000114867
817	C5	GO:BP	GOBP_NEGATIVE_REGULATION_OF_AUTOPHAGY	EIF4G2	ENSG00000110321
818	C5	GO:BP	GOBP_NEGATIVE_REGULATION_OF_AUTOPHAGY	EIF4G3	ENSG00000075151
819	C5	GO:BP	GOBP_NEGATIVE_REGULATION_OF_AUTOPHAGY	FEZ1	ENSG00000149557
820	C5	GO:BP	GOBP_NEGATIVE_REGULATION_OF_AUTOPHAGY	FEZ2	ENSG00000171055
821	C5	GO:BP	GOBP_NEGATIVE_REGULATION_OF_AUTOPHAGY	FOXK1	ENSG00000164916
822	C5	GO:BP	GOBP_NEGATIVE_REGULATION_OF_AUTOPHAGY	FOXK2	ENSG00000141568
823	C5	GO:BP	GOBP_NEGATIVE_REGULATION_OF_AUTOPHAGY	GATA4	ENSG00000136574
824	C5	GO:BP	GOBP_NEGATIVE_REGULATION_OF_AUTOPHAGY	GATA4	ENSG00000285109
825	C5	GO:BP	GOBP_NEGATIVE_REGULATION_OF_AUTOPHAGY	GOLGA2	ENSG00000167110
826	C5	GO:BP	GOBP_NEGATIVE_REGULATION_OF_AUTOPHAGY	HERC1	ENSG00000103657
827	C5	GO:BP	GOBP_NEGATIVE_REGULATION_OF_AUTOPHAGY	HGF	ENSG00000019991
828	C5	GO:BP	GOBP_NEGATIVE_REGULATION_OF_AUTOPHAGY	HMOX1	ENSG00000100292
829	C5	GO:BP	GOBP_NEGATIVE_REGULATION_OF_AUTOPHAGY	HTR2B	ENSG00000135914
830	C5	GO:BP	GOBP_NEGATIVE_REGULATION_OF_AUTOPHAGY	IL10	ENSG00000136634
831	C5	GO:BP	GOBP_NEGATIVE_REGULATION_OF_AUTOPHAGY	IL10RA	ENSG00000110324
832	C5	GO:BP	GOBP_NEGATIVE_REGULATION_OF_AUTOPHAGY	KDM4A	ENSG00000066135
833	C5	GO:BP	GOBP_NEGATIVE_REGULATION_OF_AUTOPHAGY	KIF25	ENSG00000125337
834	C5	GO:BP	GOBP_NEGATIVE_REGULATION_OF_AUTOPHAGY	KLHL22	ENSG00000099910
835	C5	GO:BP	GOBP_NEGATIVE_REGULATION_OF_AUTOPHAGY	LEP	ENSG00000174697
836	C5	GO:BP	GOBP_NEGATIVE_REGULATION_OF_AUTOPHAGY	LEPR	ENSG00000116678
837	C5	GO:BP	GOBP_NEGATIVE_REGULATION_OF_AUTOPHAGY	LRRK2	ENSG00000188906
838	C5	GO:BP	GOBP_NEGATIVE_REGULATION_OF_AUTOPHAGY	LZTS1	ENSG00000061337
839	C5	GO:BP	GOBP_NEGATIVE_REGULATION_OF_AUTOPHAGY	MAGEA3	ENSG00000221867
840	C5	GO:BP	GOBP_NEGATIVE_REGULATION_OF_AUTOPHAGY	MAGEA6	ENSG00000197172
841	C5	GO:BP	GOBP_NEGATIVE_REGULATION_OF_AUTOPHAGY	MCL1	ENSG00000143384
842	C5	GO:BP	GOBP_NEGATIVE_REGULATION_OF_AUTOPHAGY	MET	ENSG00000105976
843	C5	GO:BP	GOBP_NEGATIVE_REGULATION_OF_AUTOPHAGY	MIR199A1	ENSG00000207752
844	C5	GO:BP	GOBP_NEGATIVE_REGULATION_OF_AUTOPHAGY	MIRLET7B	ENSG00000284520
845	C5	GO:BP	GOBP_NEGATIVE_REGULATION_OF_AUTOPHAGY	MT3	ENSG00000087250
846	C5	GO:BP	GOBP_NEGATIVE_REGULATION_OF_AUTOPHAGY	MTM1	ENSG00000171100
847	C5	GO:BP	GOBP_NEGATIVE_REGULATION_OF_AUTOPHAGY	MTMR8	ENSG00000102043
848	C5	GO:BP	GOBP_NEGATIVE_REGULATION_OF_AUTOPHAGY	MTMR9	ENSG00000104643
849	C5	GO:BP	GOBP_NEGATIVE_REGULATION_OF_AUTOPHAGY	MTMR9	ENSG00000285032
850	C5	GO:BP	GOBP_NEGATIVE_REGULATION_OF_AUTOPHAGY	MTOR	ENSG00000198793
851	C5	GO:BP	GOBP_NEGATIVE_REGULATION_OF_AUTOPHAGY	NPC1	ENSG00000141458
852	C5	GO:BP	GOBP_NEGATIVE_REGULATION_OF_AUTOPHAGY	NRBP2	ENSG00000185189
1471	C5	GO:BP	GOBP_REGULATION_OF_AUTOPHAGY	MAPT	ENSG00000277956
854	C5	GO:BP	GOBP_NEGATIVE_REGULATION_OF_AUTOPHAGY	PHF23	ENSG00000040633
855	C5	GO:BP	GOBP_NEGATIVE_REGULATION_OF_AUTOPHAGY	PIK3CA	ENSG00000121879
856	C5	GO:BP	GOBP_NEGATIVE_REGULATION_OF_AUTOPHAGY	PINK1	ENSG00000158828
857	C5	GO:BP	GOBP_NEGATIVE_REGULATION_OF_AUTOPHAGY	POLDIP2	ENSG00000004142
858	C5	GO:BP	GOBP_NEGATIVE_REGULATION_OF_AUTOPHAGY	PTPN22	ENSG00000134242
859	C5	GO:BP	GOBP_NEGATIVE_REGULATION_OF_AUTOPHAGY	QSOX1	ENSG00000116260
860	C5	GO:BP	GOBP_NEGATIVE_REGULATION_OF_AUTOPHAGY	RASIP1	ENSG00000105538
861	C5	GO:BP	GOBP_NEGATIVE_REGULATION_OF_AUTOPHAGY	RNF41	ENSG00000181852
862	C5	GO:BP	GOBP_NEGATIVE_REGULATION_OF_AUTOPHAGY	RNF5	ENSG00000183574
863	C5	GO:BP	GOBP_NEGATIVE_REGULATION_OF_AUTOPHAGY	RNF5	ENSG00000204308
864	C5	GO:BP	GOBP_NEGATIVE_REGULATION_OF_AUTOPHAGY	RNF5	ENSG00000223767
865	C5	GO:BP	GOBP_NEGATIVE_REGULATION_OF_AUTOPHAGY	RNF5	ENSG00000225452
866	C5	GO:BP	GOBP_NEGATIVE_REGULATION_OF_AUTOPHAGY	RNF5	ENSG00000227277
867	C5	GO:BP	GOBP_NEGATIVE_REGULATION_OF_AUTOPHAGY	RNF5	ENSG00000228405
868	C5	GO:BP	GOBP_NEGATIVE_REGULATION_OF_AUTOPHAGY	RNF5	ENSG00000228907
869	C5	GO:BP	GOBP_NEGATIVE_REGULATION_OF_AUTOPHAGY	RRAGA	ENSG00000155876
870	C5	GO:BP	GOBP_NEGATIVE_REGULATION_OF_AUTOPHAGY	RUBCN	ENSG00000145016
871	C5	GO:BP	GOBP_NEGATIVE_REGULATION_OF_AUTOPHAGY	SCFD1	ENSG00000092108
872	C5	GO:BP	GOBP_NEGATIVE_REGULATION_OF_AUTOPHAGY	SEC22B	ENSG00000265808
873	C5	GO:BP	GOBP_NEGATIVE_REGULATION_OF_AUTOPHAGY	SIRT2	ENSG00000068903
874	C5	GO:BP	GOBP_NEGATIVE_REGULATION_OF_AUTOPHAGY	SIRT2	ENSG00000283100
875	C5	GO:BP	GOBP_NEGATIVE_REGULATION_OF_AUTOPHAGY	SMCR8	ENSG00000176994
876	C5	GO:BP	GOBP_NEGATIVE_REGULATION_OF_AUTOPHAGY	SMCR8	ENSG00000283741
877	C5	GO:BP	GOBP_NEGATIVE_REGULATION_OF_AUTOPHAGY	SMG1	ENSG00000157106
878	C5	GO:BP	GOBP_NEGATIVE_REGULATION_OF_AUTOPHAGY	SNCA	ENSG00000145335
879	C5	GO:BP	GOBP_NEGATIVE_REGULATION_OF_AUTOPHAGY	SNRNP70	ENSG00000104852
880	C5	GO:BP	GOBP_NEGATIVE_REGULATION_OF_AUTOPHAGY	STAT3	ENSG00000168610
881	C5	GO:BP	GOBP_NEGATIVE_REGULATION_OF_AUTOPHAGY	TAB2	ENSG00000055208
882	C5	GO:BP	GOBP_NEGATIVE_REGULATION_OF_AUTOPHAGY	TAB3	ENSG00000157625
883	C5	GO:BP	GOBP_NEGATIVE_REGULATION_OF_AUTOPHAGY	TBC1D14	ENSG00000132405
884	C5	GO:BP	GOBP_NEGATIVE_REGULATION_OF_AUTOPHAGY	TIGAR	ENSG00000078237
885	C5	GO:BP	GOBP_NEGATIVE_REGULATION_OF_AUTOPHAGY	TLK2	ENSG00000146872
886	C5	GO:BP	GOBP_NEGATIVE_REGULATION_OF_AUTOPHAGY	TMEM39A	ENSG00000176142
887	C5	GO:BP	GOBP_NEGATIVE_REGULATION_OF_AUTOPHAGY	TP53	ENSG00000141510
888	C5	GO:BP	GOBP_NEGATIVE_REGULATION_OF_AUTOPHAGY	TREM2	ENSG00000095970
889	C5	GO:BP	GOBP_NEGATIVE_REGULATION_OF_AUTOPHAGY	TSC1	ENSG00000165699
890	C5	GO:BP	GOBP_NEGATIVE_REGULATION_OF_AUTOPHAGY	TSC2	ENSG00000103197
891	C5	GO:BP	GOBP_NEGATIVE_REGULATION_OF_AUTOPHAGY	TSPO	ENSG00000100300
892	C5	GO:BP	GOBP_NEGATIVE_REGULATION_OF_AUTOPHAGY	UBQLN4	ENSG00000160803
893	C5	GO:BP	GOBP_NEGATIVE_REGULATION_OF_AUTOPHAGY	USP30	ENSG00000135093
894	C5	GO:BP	GOBP_NEGATIVE_REGULATION_OF_AUTOPHAGY	USP36	ENSG00000055483
895	C5	GO:BP	GOBP_NEGATIVE_REGULATION_OF_AUTOPHAGY	WASHC1	ENSG00000181404
896	C5	GO:BP	GOBP_NEGATIVE_REGULATION_OF_AUTOPHAGY	WDR6	ENSG00000178252
897	C5	GO:BP	GOBP_NEGATIVE_REGULATION_OF_AUTOPHAGY	ZKSCAN3	ENSG00000189298
898	C5	GO:BP	GOBP_NEGATIVE_REGULATION_OF_AUTOPHAGY_OF_MITOCHONDRION	PINK1	ENSG00000158828
899	C5	GO:BP	GOBP_NEGATIVE_REGULATION_OF_AUTOPHAGY_OF_MITOCHONDRION	RNF41	ENSG00000181852
900	C5	GO:BP	GOBP_NEGATIVE_REGULATION_OF_AUTOPHAGY_OF_MITOCHONDRION	TIGAR	ENSG00000078237
901	C5	GO:BP	GOBP_NEGATIVE_REGULATION_OF_AUTOPHAGY_OF_MITOCHONDRION	TP53	ENSG00000141510
902	C5	GO:BP	GOBP_NEGATIVE_REGULATION_OF_AUTOPHAGY_OF_MITOCHONDRION	TSC2	ENSG00000103197
903	C5	GO:BP	GOBP_NEGATIVE_REGULATION_OF_AUTOPHAGY_OF_MITOCHONDRION	TSPO	ENSG00000100300
904	C5	GO:BP	GOBP_NEGATIVE_REGULATION_OF_AUTOPHAGY_OF_MITOCHONDRION	USP30	ENSG00000135093
905	C5	GO:BP	GOBP_NEGATIVE_REGULATION_OF_MACROAUTOPHAGY	AKT1	ENSG00000142208
906	C5	GO:BP	GOBP_NEGATIVE_REGULATION_OF_MACROAUTOPHAGY	BECN1	ENSG00000126581
907	C5	GO:BP	GOBP_NEGATIVE_REGULATION_OF_MACROAUTOPHAGY	CHMP4A	ENSG00000254505
908	C5	GO:BP	GOBP_NEGATIVE_REGULATION_OF_MACROAUTOPHAGY	CHMP4A	ENSG00000285302
909	C5	GO:BP	GOBP_NEGATIVE_REGULATION_OF_MACROAUTOPHAGY	CHMP4B	ENSG00000101421
910	C5	GO:BP	GOBP_NEGATIVE_REGULATION_OF_MACROAUTOPHAGY	CLEC16A	ENSG00000038532
911	C5	GO:BP	GOBP_NEGATIVE_REGULATION_OF_MACROAUTOPHAGY	EHMT2	ENSG00000204371
912	C5	GO:BP	GOBP_NEGATIVE_REGULATION_OF_MACROAUTOPHAGY	EHMT2	ENSG00000206376
913	C5	GO:BP	GOBP_NEGATIVE_REGULATION_OF_MACROAUTOPHAGY	EHMT2	ENSG00000224143
914	C5	GO:BP	GOBP_NEGATIVE_REGULATION_OF_MACROAUTOPHAGY	EHMT2	ENSG00000227333
915	C5	GO:BP	GOBP_NEGATIVE_REGULATION_OF_MACROAUTOPHAGY	EHMT2	ENSG00000232045
916	C5	GO:BP	GOBP_NEGATIVE_REGULATION_OF_MACROAUTOPHAGY	EHMT2	ENSG00000236759
917	C5	GO:BP	GOBP_NEGATIVE_REGULATION_OF_MACROAUTOPHAGY	EHMT2	ENSG00000238134
918	C5	GO:BP	GOBP_NEGATIVE_REGULATION_OF_MACROAUTOPHAGY	FEZ1	ENSG00000149557
919	C5	GO:BP	GOBP_NEGATIVE_REGULATION_OF_MACROAUTOPHAGY	FEZ2	ENSG00000171055
920	C5	GO:BP	GOBP_NEGATIVE_REGULATION_OF_MACROAUTOPHAGY	HMOX1	ENSG00000100292
921	C5	GO:BP	GOBP_NEGATIVE_REGULATION_OF_MACROAUTOPHAGY	LRRK2	ENSG00000188906
922	C5	GO:BP	GOBP_NEGATIVE_REGULATION_OF_MACROAUTOPHAGY	LZTS1	ENSG00000061337
923	C5	GO:BP	GOBP_NEGATIVE_REGULATION_OF_MACROAUTOPHAGY	MTM1	ENSG00000171100
924	C5	GO:BP	GOBP_NEGATIVE_REGULATION_OF_MACROAUTOPHAGY	MTOR	ENSG00000198793
925	C5	GO:BP	GOBP_NEGATIVE_REGULATION_OF_MACROAUTOPHAGY	NPC1	ENSG00000141458
926	C5	GO:BP	GOBP_NEGATIVE_REGULATION_OF_MACROAUTOPHAGY	NRBP2	ENSG00000185189
157	C5	GO:BP	GOBP_AUTOPHAGOSOME_ORGANIZATION	NUPR1	ENSG00000176046
928	C5	GO:BP	GOBP_NEGATIVE_REGULATION_OF_MACROAUTOPHAGY	PHF23	ENSG00000040633
929	C5	GO:BP	GOBP_NEGATIVE_REGULATION_OF_MACROAUTOPHAGY	PIK3CA	ENSG00000121879
930	C5	GO:BP	GOBP_NEGATIVE_REGULATION_OF_MACROAUTOPHAGY	PINK1	ENSG00000158828
931	C5	GO:BP	GOBP_NEGATIVE_REGULATION_OF_MACROAUTOPHAGY	POLDIP2	ENSG00000004142
932	C5	GO:BP	GOBP_NEGATIVE_REGULATION_OF_MACROAUTOPHAGY	QSOX1	ENSG00000116260
933	C5	GO:BP	GOBP_NEGATIVE_REGULATION_OF_MACROAUTOPHAGY	RNF41	ENSG00000181852
934	C5	GO:BP	GOBP_NEGATIVE_REGULATION_OF_MACROAUTOPHAGY	RUBCN	ENSG00000145016
935	C5	GO:BP	GOBP_NEGATIVE_REGULATION_OF_MACROAUTOPHAGY	SCFD1	ENSG00000092108
936	C5	GO:BP	GOBP_NEGATIVE_REGULATION_OF_MACROAUTOPHAGY	SEC22B	ENSG00000265808
937	C5	GO:BP	GOBP_NEGATIVE_REGULATION_OF_MACROAUTOPHAGY	SMCR8	ENSG00000176994
938	C5	GO:BP	GOBP_NEGATIVE_REGULATION_OF_MACROAUTOPHAGY	SMCR8	ENSG00000283741
939	C5	GO:BP	GOBP_NEGATIVE_REGULATION_OF_MACROAUTOPHAGY	SMG1	ENSG00000157106
940	C5	GO:BP	GOBP_NEGATIVE_REGULATION_OF_MACROAUTOPHAGY	TIGAR	ENSG00000078237
941	C5	GO:BP	GOBP_NEGATIVE_REGULATION_OF_MACROAUTOPHAGY	TMEM39A	ENSG00000176142
942	C5	GO:BP	GOBP_NEGATIVE_REGULATION_OF_MACROAUTOPHAGY	TP53	ENSG00000141510
943	C5	GO:BP	GOBP_NEGATIVE_REGULATION_OF_MACROAUTOPHAGY	TSC1	ENSG00000165699
944	C5	GO:BP	GOBP_NEGATIVE_REGULATION_OF_MACROAUTOPHAGY	TSC2	ENSG00000103197
945	C5	GO:BP	GOBP_NEGATIVE_REGULATION_OF_MACROAUTOPHAGY	UBQLN4	ENSG00000160803
946	C5	GO:BP	GOBP_NEGATIVE_REGULATION_OF_MACROAUTOPHAGY	USP30	ENSG00000135093
947	C5	GO:BP	GOBP_NEGATIVE_REGULATION_OF_MACROAUTOPHAGY	USP36	ENSG00000055483
948	C5	GO:BP	GOBP_NEGATIVE_REGULATION_OF_MITOPHAGY	RNF41	ENSG00000181852
949	C5	GO:BP	GOBP_NEGATIVE_REGULATION_OF_MITOPHAGY	TIGAR	ENSG00000078237
950	C5	GO:BP	GOBP_NEGATIVE_REGULATION_OF_MITOPHAGY	TP53	ENSG00000141510
951	C5	GO:BP	GOBP_NEGATIVE_REGULATION_OF_MITOPHAGY	TSC2	ENSG00000103197
952	C5	GO:BP	GOBP_NEGATIVE_REGULATION_OF_MITOPHAGY	USP30	ENSG00000135093
953	C5	GO:BP	GOBP_PARKIN_MEDIATED_STIMULATION_OF_MITOPHAGY_IN_RESPONSE_TO_MITOCHONDRIAL_DEPOLARIZATION	HDAC6	ENSG00000094631
954	C5	GO:BP	GOBP_PARKIN_MEDIATED_STIMULATION_OF_MITOPHAGY_IN_RESPONSE_TO_MITOCHONDRIAL_DEPOLARIZATION	MFN2	ENSG00000116688
955	C5	GO:BP	GOBP_PARKIN_MEDIATED_STIMULATION_OF_MITOPHAGY_IN_RESPONSE_TO_MITOCHONDRIAL_DEPOLARIZATION	OPTN	ENSG00000123240
956	C5	GO:BP	GOBP_PARKIN_MEDIATED_STIMULATION_OF_MITOPHAGY_IN_RESPONSE_TO_MITOCHONDRIAL_DEPOLARIZATION	PRKN	ENSG00000185345
957	C5	GO:BP	GOBP_PARKIN_MEDIATED_STIMULATION_OF_MITOPHAGY_IN_RESPONSE_TO_MITOCHONDRIAL_DEPOLARIZATION	VPS13C	ENSG00000129003
958	C5	GO:BP	GOBP_PHAGOSOME_ACIDIFICATION	RAB20	ENSG00000139832
959	C5	GO:BP	GOBP_PHAGOSOME_ACIDIFICATION	RAB38	ENSG00000123892
960	C5	GO:BP	GOBP_PHAGOSOME_ACIDIFICATION	RAB39A	ENSG00000179331
961	C5	GO:BP	GOBP_PHAGOSOME_ACIDIFICATION	RAB7A	ENSG00000075785
962	C5	GO:BP	GOBP_PHAGOSOME_ACIDIFICATION	SLAMF8	ENSG00000158714
963	C5	GO:BP	GOBP_PHAGOSOME_ACIDIFICATION	TCIRG1	ENSG00000110719
964	C5	GO:BP	GOBP_PHAGOSOME_LYSOSOME_FUSION	ARL8B	ENSG00000134108
965	C5	GO:BP	GOBP_PHAGOSOME_LYSOSOME_FUSION	CLN3	ENSG00000188603
966	C5	GO:BP	GOBP_PHAGOSOME_LYSOSOME_FUSION	PIKFYVE	ENSG00000115020
967	C5	GO:BP	GOBP_PHAGOSOME_LYSOSOME_FUSION	PLA2G5	ENSG00000127472
968	C5	GO:BP	GOBP_PHAGOSOME_LYSOSOME_FUSION	RAB20	ENSG00000139832
969	C5	GO:BP	GOBP_PHAGOSOME_LYSOSOME_FUSION	RAB34	ENSG00000109113
970	C5	GO:BP	GOBP_PHAGOSOME_LYSOSOME_FUSION	RAB39A	ENSG00000179331
971	C5	GO:BP	GOBP_PHAGOSOME_LYSOSOME_FUSION	RAB7A	ENSG00000075785
972	C5	GO:BP	GOBP_PHAGOSOME_LYSOSOME_FUSION	RAB7B	ENSG00000276600
973	C5	GO:BP	GOBP_PHAGOSOME_LYSOSOME_FUSION	SPG11	ENSG00000104133
974	C5	GO:BP	GOBP_PHAGOSOME_LYSOSOME_FUSION	SYT7	ENSG00000011347
975	C5	GO:BP	GOBP_PHAGOSOME_LYSOSOME_FUSION	TMEM175	ENSG00000127419
976	C5	GO:BP	GOBP_PHAGOSOME_MATURATION	ARL8B	ENSG00000134108
977	C5	GO:BP	GOBP_PHAGOSOME_MATURATION	CLN3	ENSG00000188603
978	C5	GO:BP	GOBP_PHAGOSOME_MATURATION	CORO1A	ENSG00000102879
979	C5	GO:BP	GOBP_PHAGOSOME_MATURATION	MCOLN1	ENSG00000090674
980	C5	GO:BP	GOBP_PHAGOSOME_MATURATION	MREG	ENSG00000118242
981	C5	GO:BP	GOBP_PHAGOSOME_MATURATION	MYO7A	ENSG00000137474
982	C5	GO:BP	GOBP_PHAGOSOME_MATURATION	P2RX7	ENSG00000089041
983	C5	GO:BP	GOBP_PHAGOSOME_MATURATION	PIKFYVE	ENSG00000115020
984	C5	GO:BP	GOBP_PHAGOSOME_MATURATION	PLA2G5	ENSG00000127472
985	C5	GO:BP	GOBP_PHAGOSOME_MATURATION	RAB14	ENSG00000119396
986	C5	GO:BP	GOBP_PHAGOSOME_MATURATION	RAB20	ENSG00000139832
987	C5	GO:BP	GOBP_PHAGOSOME_MATURATION	RAB31	ENSG00000168461
988	C5	GO:BP	GOBP_PHAGOSOME_MATURATION	RAB32	ENSG00000118508
989	C5	GO:BP	GOBP_PHAGOSOME_MATURATION	RAB34	ENSG00000109113
990	C5	GO:BP	GOBP_PHAGOSOME_MATURATION	RAB38	ENSG00000123892
991	C5	GO:BP	GOBP_PHAGOSOME_MATURATION	RAB39A	ENSG00000179331
992	C5	GO:BP	GOBP_PHAGOSOME_MATURATION	RAB43	ENSG00000172780
993	C5	GO:BP	GOBP_PHAGOSOME_MATURATION	RAB7A	ENSG00000075785
994	C5	GO:BP	GOBP_PHAGOSOME_MATURATION	RAB7B	ENSG00000276600
995	C5	GO:BP	GOBP_PHAGOSOME_MATURATION	SLAMF8	ENSG00000158714
996	C5	GO:BP	GOBP_PHAGOSOME_MATURATION	SPG11	ENSG00000104133
997	C5	GO:BP	GOBP_PHAGOSOME_MATURATION	SRPX	ENSG00000101955
998	C5	GO:BP	GOBP_PHAGOSOME_MATURATION	SYT11	ENSG00000132718
999	C5	GO:BP	GOBP_PHAGOSOME_MATURATION	SYT7	ENSG00000011347
1000	C5	GO:BP	GOBP_PHAGOSOME_MATURATION	TCIRG1	ENSG00000110719
1001	C5	GO:BP	GOBP_PHAGOSOME_MATURATION	TMEM175	ENSG00000127419
1002	C5	GO:BP	GOBP_PIECEMEAL_MICROAUTOPHAGY_OF_THE_NUCLEUS	ATG13	ENSG00000175224
1003	C5	GO:BP	GOBP_PIECEMEAL_MICROAUTOPHAGY_OF_THE_NUCLEUS	ATG2A	ENSG00000110046
1004	C5	GO:BP	GOBP_PIECEMEAL_MICROAUTOPHAGY_OF_THE_NUCLEUS	ATG2B	ENSG00000066739
1005	C5	GO:BP	GOBP_PIECEMEAL_MICROAUTOPHAGY_OF_THE_NUCLEUS	ATG7	ENSG00000197548
1006	C5	GO:BP	GOBP_PIECEMEAL_MICROAUTOPHAGY_OF_THE_NUCLEUS	RB1CC1	ENSG00000023287
1007	C5	GO:BP	GOBP_PIECEMEAL_MICROAUTOPHAGY_OF_THE_NUCLEUS	ULK1	ENSG00000177169
1008	C5	GO:BP	GOBP_PIECEMEAL_MICROAUTOPHAGY_OF_THE_NUCLEUS	ULK2	ENSG00000083290
1009	C5	GO:BP	GOBP_POSITIVE_REGULATION_OF_AUTOPHAGOSOME_MATURATION	ADRB2	ENSG00000169252
1010	C5	GO:BP	GOBP_POSITIVE_REGULATION_OF_AUTOPHAGOSOME_MATURATION	CALCOCO2	ENSG00000136436
1011	C5	GO:BP	GOBP_POSITIVE_REGULATION_OF_AUTOPHAGOSOME_MATURATION	FYCO1	ENSG00000163820
1012	C5	GO:BP	GOBP_POSITIVE_REGULATION_OF_AUTOPHAGOSOME_MATURATION	IRGM	ENSG00000237693
1013	C5	GO:BP	GOBP_POSITIVE_REGULATION_OF_AUTOPHAGOSOME_MATURATION	SMCR8	ENSG00000176994
1014	C5	GO:BP	GOBP_POSITIVE_REGULATION_OF_AUTOPHAGOSOME_MATURATION	SMCR8	ENSG00000283741
1015	C5	GO:BP	GOBP_POSITIVE_REGULATION_OF_AUTOPHAGOSOME_MATURATION	UVRAG	ENSG00000198382
1016	C5	GO:BP	GOBP_POSITIVE_REGULATION_OF_AUTOPHAGY	ADRB2	ENSG00000169252
1017	C5	GO:BP	GOBP_POSITIVE_REGULATION_OF_AUTOPHAGY	AMBRA1	ENSG00000110497
1018	C5	GO:BP	GOBP_POSITIVE_REGULATION_OF_AUTOPHAGY	ATF6	ENSG00000118217
1019	C5	GO:BP	GOBP_POSITIVE_REGULATION_OF_AUTOPHAGY	ATG16L1	ENSG00000085978
1020	C5	GO:BP	GOBP_POSITIVE_REGULATION_OF_AUTOPHAGY	ATG16L1	ENSG00000281089
1021	C5	GO:BP	GOBP_POSITIVE_REGULATION_OF_AUTOPHAGY	ATG2A	ENSG00000110046
1022	C5	GO:BP	GOBP_POSITIVE_REGULATION_OF_AUTOPHAGY	BAD	ENSG00000002330
1023	C5	GO:BP	GOBP_POSITIVE_REGULATION_OF_AUTOPHAGY	BAG3	ENSG00000151929
1024	C5	GO:BP	GOBP_POSITIVE_REGULATION_OF_AUTOPHAGY	BCL2L11	ENSG00000153094
1025	C5	GO:BP	GOBP_POSITIVE_REGULATION_OF_AUTOPHAGY	BECN1	ENSG00000126581
1026	C5	GO:BP	GOBP_POSITIVE_REGULATION_OF_AUTOPHAGY	BNIP3	ENSG00000176171
1027	C5	GO:BP	GOBP_POSITIVE_REGULATION_OF_AUTOPHAGY	BNIP3L	ENSG00000104765
1028	C5	GO:BP	GOBP_POSITIVE_REGULATION_OF_AUTOPHAGY	C9orf72	ENSG00000147894
1029	C5	GO:BP	GOBP_POSITIVE_REGULATION_OF_AUTOPHAGY	CALCOCO2	ENSG00000136436
1030	C5	GO:BP	GOBP_POSITIVE_REGULATION_OF_AUTOPHAGY	CAMKK2	ENSG00000110931
1031	C5	GO:BP	GOBP_POSITIVE_REGULATION_OF_AUTOPHAGY	CERS1	ENSG00000223802
1032	C5	GO:BP	GOBP_POSITIVE_REGULATION_OF_AUTOPHAGY	DAPK1	ENSG00000196730
1033	C5	GO:BP	GOBP_POSITIVE_REGULATION_OF_AUTOPHAGY	DCN	ENSG00000011465
1034	C5	GO:BP	GOBP_POSITIVE_REGULATION_OF_AUTOPHAGY	DEPDC5	ENSG00000100150
1035	C5	GO:BP	GOBP_POSITIVE_REGULATION_OF_AUTOPHAGY	DHRSX	ENSG00000169084
1036	C5	GO:BP	GOBP_POSITIVE_REGULATION_OF_AUTOPHAGY	ELAPOR1	ENSG00000116299
1037	C5	GO:BP	GOBP_POSITIVE_REGULATION_OF_AUTOPHAGY	ENDOG	ENSG00000167136
1038	C5	GO:BP	GOBP_POSITIVE_REGULATION_OF_AUTOPHAGY	EPM2A	ENSG00000112425
1039	C5	GO:BP	GOBP_POSITIVE_REGULATION_OF_AUTOPHAGY	FBXO7	ENSG00000100225
1040	C5	GO:BP	GOBP_POSITIVE_REGULATION_OF_AUTOPHAGY	FLCN	ENSG00000154803
1041	C5	GO:BP	GOBP_POSITIVE_REGULATION_OF_AUTOPHAGY	FOXO1	ENSG00000150907
1042	C5	GO:BP	GOBP_POSITIVE_REGULATION_OF_AUTOPHAGY	FOXO3	ENSG00000118689
1043	C5	GO:BP	GOBP_POSITIVE_REGULATION_OF_AUTOPHAGY	FYCO1	ENSG00000163820
1044	C5	GO:BP	GOBP_POSITIVE_REGULATION_OF_AUTOPHAGY	GNAI3	ENSG00000065135
1045	C5	GO:BP	GOBP_POSITIVE_REGULATION_OF_AUTOPHAGY	GPSM1	ENSG00000160360
1046	C5	GO:BP	GOBP_POSITIVE_REGULATION_OF_AUTOPHAGY	GSK3A	ENSG00000105723
1047	C5	GO:BP	GOBP_POSITIVE_REGULATION_OF_AUTOPHAGY	GSK3B	ENSG00000082701
1048	C5	GO:BP	GOBP_POSITIVE_REGULATION_OF_AUTOPHAGY	HIF1A	ENSG00000100644
1049	C5	GO:BP	GOBP_POSITIVE_REGULATION_OF_AUTOPHAGY	HMGB1	ENSG00000189403
1050	C5	GO:BP	GOBP_POSITIVE_REGULATION_OF_AUTOPHAGY	HMOX1	ENSG00000100292
1051	C5	GO:BP	GOBP_POSITIVE_REGULATION_OF_AUTOPHAGY	HSPB8	ENSG00000152137
1052	C5	GO:BP	GOBP_POSITIVE_REGULATION_OF_AUTOPHAGY	HTT	ENSG00000197386
1053	C5	GO:BP	GOBP_POSITIVE_REGULATION_OF_AUTOPHAGY	IFNG	ENSG00000111537
1054	C5	GO:BP	GOBP_POSITIVE_REGULATION_OF_AUTOPHAGY	IKBKG	ENSG00000269335
1055	C5	GO:BP	GOBP_POSITIVE_REGULATION_OF_AUTOPHAGY	IL4	ENSG00000113520
1056	C5	GO:BP	GOBP_POSITIVE_REGULATION_OF_AUTOPHAGY	IRGM	ENSG00000237693
1057	C5	GO:BP	GOBP_POSITIVE_REGULATION_OF_AUTOPHAGY	KAT5	ENSG00000172977
1058	C5	GO:BP	GOBP_POSITIVE_REGULATION_OF_AUTOPHAGY	KDR	ENSG00000128052
1059	C5	GO:BP	GOBP_POSITIVE_REGULATION_OF_AUTOPHAGY	LACRT	ENSG00000135413
1060	C5	GO:BP	GOBP_POSITIVE_REGULATION_OF_AUTOPHAGY	LARP1	ENSG00000155506
1061	C5	GO:BP	GOBP_POSITIVE_REGULATION_OF_AUTOPHAGY	LRRK2	ENSG00000188906
1062	C5	GO:BP	GOBP_POSITIVE_REGULATION_OF_AUTOPHAGY	LRSAM1	ENSG00000148356
1063	C5	GO:BP	GOBP_POSITIVE_REGULATION_OF_AUTOPHAGY	MAP3K7	ENSG00000135341
1064	C5	GO:BP	GOBP_POSITIVE_REGULATION_OF_AUTOPHAGY	MAPK3	ENSG00000102882
1065	C5	GO:BP	GOBP_POSITIVE_REGULATION_OF_AUTOPHAGY	MEFV	ENSG00000103313
1066	C5	GO:BP	GOBP_POSITIVE_REGULATION_OF_AUTOPHAGY	MID2	ENSG00000080561
1067	C5	GO:BP	GOBP_POSITIVE_REGULATION_OF_AUTOPHAGY	MOAP1	ENSG00000165943
1068	C5	GO:BP	GOBP_POSITIVE_REGULATION_OF_AUTOPHAGY	MOAP1	ENSG00000278268
1069	C5	GO:BP	GOBP_POSITIVE_REGULATION_OF_AUTOPHAGY	MTDH	ENSG00000147649
1070	C5	GO:BP	GOBP_POSITIVE_REGULATION_OF_AUTOPHAGY	NOD1	ENSG00000106100
1071	C5	GO:BP	GOBP_POSITIVE_REGULATION_OF_AUTOPHAGY	NOD2	ENSG00000167207
1072	C5	GO:BP	GOBP_POSITIVE_REGULATION_OF_AUTOPHAGY	NPRL2	ENSG00000114388
1073	C5	GO:BP	GOBP_POSITIVE_REGULATION_OF_AUTOPHAGY	NPRL3	ENSG00000103148
1074	C5	GO:BP	GOBP_POSITIVE_REGULATION_OF_AUTOPHAGY	OPTN	ENSG00000123240
1075	C5	GO:BP	GOBP_POSITIVE_REGULATION_OF_AUTOPHAGY	ORMDL3	ENSG00000172057
1076	C5	GO:BP	GOBP_POSITIVE_REGULATION_OF_AUTOPHAGY	PAFAH1B2	ENSG00000168092
1077	C5	GO:BP	GOBP_POSITIVE_REGULATION_OF_AUTOPHAGY	PARK7	ENSG00000116288
1078	C5	GO:BP	GOBP_POSITIVE_REGULATION_OF_AUTOPHAGY	PIK3C2A	ENSG00000011405
1079	C5	GO:BP	GOBP_POSITIVE_REGULATION_OF_AUTOPHAGY	PIK3CB	ENSG00000051382
1080	C5	GO:BP	GOBP_POSITIVE_REGULATION_OF_AUTOPHAGY	PIM2	ENSG00000102096
1081	C5	GO:BP	GOBP_POSITIVE_REGULATION_OF_AUTOPHAGY	PINK1	ENSG00000158828
1082	C5	GO:BP	GOBP_POSITIVE_REGULATION_OF_AUTOPHAGY	PIP4K2A	ENSG00000150867
1083	C5	GO:BP	GOBP_POSITIVE_REGULATION_OF_AUTOPHAGY	PIP4K2B	ENSG00000276293
1084	C5	GO:BP	GOBP_POSITIVE_REGULATION_OF_AUTOPHAGY	PIP4K2B	ENSG00000277292
1085	C5	GO:BP	GOBP_POSITIVE_REGULATION_OF_AUTOPHAGY	PIP4K2C	ENSG00000166908
1086	C5	GO:BP	GOBP_POSITIVE_REGULATION_OF_AUTOPHAGY	PLEKHF1	ENSG00000166289
1087	C5	GO:BP	GOBP_POSITIVE_REGULATION_OF_AUTOPHAGY	PLK2	ENSG00000145632
1088	C5	GO:BP	GOBP_POSITIVE_REGULATION_OF_AUTOPHAGY	PLK3	ENSG00000173846
1089	C5	GO:BP	GOBP_POSITIVE_REGULATION_OF_AUTOPHAGY	PRKAA1	ENSG00000132356
552	C5	GO:BP	GOBP_MACROAUTOPHAGY	NUPR1	ENSG00000176046
1091	C5	GO:BP	GOBP_POSITIVE_REGULATION_OF_AUTOPHAGY	PRKD1	ENSG00000184304
1092	C5	GO:BP	GOBP_POSITIVE_REGULATION_OF_AUTOPHAGY	PRKN	ENSG00000185345
1093	C5	GO:BP	GOBP_POSITIVE_REGULATION_OF_AUTOPHAGY	RAB3GAP1	ENSG00000115839
1094	C5	GO:BP	GOBP_POSITIVE_REGULATION_OF_AUTOPHAGY	RAB3GAP2	ENSG00000118873
1095	C5	GO:BP	GOBP_POSITIVE_REGULATION_OF_AUTOPHAGY	RALB	ENSG00000144118
1096	C5	GO:BP	GOBP_POSITIVE_REGULATION_OF_AUTOPHAGY	RIPK2	ENSG00000104312
1097	C5	GO:BP	GOBP_POSITIVE_REGULATION_OF_AUTOPHAGY	RNF152	ENSG00000176641
1098	C5	GO:BP	GOBP_POSITIVE_REGULATION_OF_AUTOPHAGY	RNF31	ENSG00000092098
1099	C5	GO:BP	GOBP_POSITIVE_REGULATION_OF_AUTOPHAGY	RNF31	ENSG00000285152
1100	C5	GO:BP	GOBP_POSITIVE_REGULATION_OF_AUTOPHAGY	ROCK1	ENSG00000067900
1101	C5	GO:BP	GOBP_POSITIVE_REGULATION_OF_AUTOPHAGY	RUFY4	ENSG00000188282
1102	C5	GO:BP	GOBP_POSITIVE_REGULATION_OF_AUTOPHAGY	SCOC	ENSG00000153130
1103	C5	GO:BP	GOBP_POSITIVE_REGULATION_OF_AUTOPHAGY	SESN1	ENSG00000080546
1104	C5	GO:BP	GOBP_POSITIVE_REGULATION_OF_AUTOPHAGY	SESN2	ENSG00000130766
1105	C5	GO:BP	GOBP_POSITIVE_REGULATION_OF_AUTOPHAGY	SESN2	ENSG00000285069
1106	C5	GO:BP	GOBP_POSITIVE_REGULATION_OF_AUTOPHAGY	SESN3	ENSG00000149212
1107	C5	GO:BP	GOBP_POSITIVE_REGULATION_OF_AUTOPHAGY	SH3BP4	ENSG00000130147
1108	C5	GO:BP	GOBP_POSITIVE_REGULATION_OF_AUTOPHAGY	SH3GLB1	ENSG00000097033
1109	C5	GO:BP	GOBP_POSITIVE_REGULATION_OF_AUTOPHAGY	SIRT1	ENSG00000096717
1110	C5	GO:BP	GOBP_POSITIVE_REGULATION_OF_AUTOPHAGY	SLC25A4	ENSG00000151729
1111	C5	GO:BP	GOBP_POSITIVE_REGULATION_OF_AUTOPHAGY	SLC25A5	ENSG00000005022
1112	C5	GO:BP	GOBP_POSITIVE_REGULATION_OF_AUTOPHAGY	SMCR8	ENSG00000176994
1113	C5	GO:BP	GOBP_POSITIVE_REGULATION_OF_AUTOPHAGY	SMCR8	ENSG00000283741
1114	C5	GO:BP	GOBP_POSITIVE_REGULATION_OF_AUTOPHAGY	SNX18	ENSG00000178996
1115	C5	GO:BP	GOBP_POSITIVE_REGULATION_OF_AUTOPHAGY	SNX30	ENSG00000148158
1116	C5	GO:BP	GOBP_POSITIVE_REGULATION_OF_AUTOPHAGY	SNX4	ENSG00000114520
1117	C5	GO:BP	GOBP_POSITIVE_REGULATION_OF_AUTOPHAGY	SNX7	ENSG00000162627
1118	C5	GO:BP	GOBP_POSITIVE_REGULATION_OF_AUTOPHAGY	SPTLC1	ENSG00000090054
1119	C5	GO:BP	GOBP_POSITIVE_REGULATION_OF_AUTOPHAGY	SPTLC2	ENSG00000100596
1120	C5	GO:BP	GOBP_POSITIVE_REGULATION_OF_AUTOPHAGY	STING1	ENSG00000184584
1121	C5	GO:BP	GOBP_POSITIVE_REGULATION_OF_AUTOPHAGY	STING1	ENSG00000288243
1122	C5	GO:BP	GOBP_POSITIVE_REGULATION_OF_AUTOPHAGY	STK11	ENSG00000118046
1123	C5	GO:BP	GOBP_POSITIVE_REGULATION_OF_AUTOPHAGY	SUPT5H	ENSG00000196235
1124	C5	GO:BP	GOBP_POSITIVE_REGULATION_OF_AUTOPHAGY	SVIP	ENSG00000198168
1125	C5	GO:BP	GOBP_POSITIVE_REGULATION_OF_AUTOPHAGY	TBK1	ENSG00000183735
1126	C5	GO:BP	GOBP_POSITIVE_REGULATION_OF_AUTOPHAGY	TFEB	ENSG00000112561
1127	C5	GO:BP	GOBP_POSITIVE_REGULATION_OF_AUTOPHAGY	TICAM1	ENSG00000127666
1128	C5	GO:BP	GOBP_POSITIVE_REGULATION_OF_AUTOPHAGY	TMEM59	ENSG00000116209
781	C5	GO:BP	GOBP_NEGATIVE_REGULATION_OF_AUTOPHAGOSOME_ASSEMBLY	NUPR1	ENSG00000176046
1130	C5	GO:BP	GOBP_POSITIVE_REGULATION_OF_AUTOPHAGY	TP53INP2	ENSG00000078804
1131	C5	GO:BP	GOBP_POSITIVE_REGULATION_OF_AUTOPHAGY	TPCN1	ENSG00000186815
1132	C5	GO:BP	GOBP_POSITIVE_REGULATION_OF_AUTOPHAGY	TRIM13	ENSG00000204977
1133	C5	GO:BP	GOBP_POSITIVE_REGULATION_OF_AUTOPHAGY	TRIM14	ENSG00000106785
1134	C5	GO:BP	GOBP_POSITIVE_REGULATION_OF_AUTOPHAGY	TRIM21	ENSG00000132109
1135	C5	GO:BP	GOBP_POSITIVE_REGULATION_OF_AUTOPHAGY	TRIM22	ENSG00000132274
1136	C5	GO:BP	GOBP_POSITIVE_REGULATION_OF_AUTOPHAGY	TRIM27	ENSG00000204713
1137	C5	GO:BP	GOBP_POSITIVE_REGULATION_OF_AUTOPHAGY	TRIM27	ENSG00000215641
1138	C5	GO:BP	GOBP_POSITIVE_REGULATION_OF_AUTOPHAGY	TRIM27	ENSG00000229006
1139	C5	GO:BP	GOBP_POSITIVE_REGULATION_OF_AUTOPHAGY	TRIM27	ENSG00000233948
1140	C5	GO:BP	GOBP_POSITIVE_REGULATION_OF_AUTOPHAGY	TRIM27	ENSG00000234495
1141	C5	GO:BP	GOBP_POSITIVE_REGULATION_OF_AUTOPHAGY	TRIM27	ENSG00000237071
1142	C5	GO:BP	GOBP_POSITIVE_REGULATION_OF_AUTOPHAGY	TRIM27	ENSG00000237462
1143	C5	GO:BP	GOBP_POSITIVE_REGULATION_OF_AUTOPHAGY	TRIM32	ENSG00000119401
1144	C5	GO:BP	GOBP_POSITIVE_REGULATION_OF_AUTOPHAGY	TRIM34	ENSG00000258659
1145	C5	GO:BP	GOBP_POSITIVE_REGULATION_OF_AUTOPHAGY	TRIM38	ENSG00000112343
1146	C5	GO:BP	GOBP_POSITIVE_REGULATION_OF_AUTOPHAGY	TRIM5	ENSG00000132256
1147	C5	GO:BP	GOBP_POSITIVE_REGULATION_OF_AUTOPHAGY	TRIM6	ENSG00000121236
1148	C5	GO:BP	GOBP_POSITIVE_REGULATION_OF_AUTOPHAGY	TRIM65	ENSG00000141569
1149	C5	GO:BP	GOBP_POSITIVE_REGULATION_OF_AUTOPHAGY	TRIM68	ENSG00000167333
1150	C5	GO:BP	GOBP_POSITIVE_REGULATION_OF_AUTOPHAGY	TRIM8	ENSG00000171206
1151	C5	GO:BP	GOBP_POSITIVE_REGULATION_OF_AUTOPHAGY	TRIML1	ENSG00000184108
1152	C5	GO:BP	GOBP_POSITIVE_REGULATION_OF_AUTOPHAGY	TRIML2	ENSG00000179046
1153	C5	GO:BP	GOBP_POSITIVE_REGULATION_OF_AUTOPHAGY	TSC1	ENSG00000165699
1154	C5	GO:BP	GOBP_POSITIVE_REGULATION_OF_AUTOPHAGY	TSC2	ENSG00000103197
1155	C5	GO:BP	GOBP_POSITIVE_REGULATION_OF_AUTOPHAGY	UFL1	ENSG00000014123
1156	C5	GO:BP	GOBP_POSITIVE_REGULATION_OF_AUTOPHAGY	ULK1	ENSG00000177169
1157	C5	GO:BP	GOBP_POSITIVE_REGULATION_OF_AUTOPHAGY	ULK2	ENSG00000083290
1158	C5	GO:BP	GOBP_POSITIVE_REGULATION_OF_AUTOPHAGY	UVRAG	ENSG00000198382
1159	C5	GO:BP	GOBP_POSITIVE_REGULATION_OF_AUTOPHAGY	VDAC1	ENSG00000213585
1160	C5	GO:BP	GOBP_POSITIVE_REGULATION_OF_AUTOPHAGY	VPS13D	ENSG00000048707
1161	C5	GO:BP	GOBP_POSITIVE_REGULATION_OF_AUTOPHAGY	WAC	ENSG00000095787
1162	C5	GO:BP	GOBP_POSITIVE_REGULATION_OF_AUTOPHAGY	WDR45	ENSG00000188378
1163	C5	GO:BP	GOBP_POSITIVE_REGULATION_OF_AUTOPHAGY	WDR45	ENSG00000196998
1164	C5	GO:BP	GOBP_POSITIVE_REGULATION_OF_AUTOPHAGY	WIPI1	ENSG00000070540
1165	C5	GO:BP	GOBP_POSITIVE_REGULATION_OF_AUTOPHAGY	ZC3H12A	ENSG00000163874
1166	C5	GO:BP	GOBP_POSITIVE_REGULATION_OF_AUTOPHAGY_OF_MITOCHONDRION	AMBRA1	ENSG00000110497
1167	C5	GO:BP	GOBP_POSITIVE_REGULATION_OF_AUTOPHAGY_OF_MITOCHONDRION	BNIP3	ENSG00000176171
1168	C5	GO:BP	GOBP_POSITIVE_REGULATION_OF_AUTOPHAGY_OF_MITOCHONDRION	CAMKK2	ENSG00000110931
1169	C5	GO:BP	GOBP_POSITIVE_REGULATION_OF_AUTOPHAGY_OF_MITOCHONDRION	CERS1	ENSG00000223802
1170	C5	GO:BP	GOBP_POSITIVE_REGULATION_OF_AUTOPHAGY_OF_MITOCHONDRION	FBXO7	ENSG00000100225
1171	C5	GO:BP	GOBP_POSITIVE_REGULATION_OF_AUTOPHAGY_OF_MITOCHONDRION	HIF1A	ENSG00000100644
1172	C5	GO:BP	GOBP_POSITIVE_REGULATION_OF_AUTOPHAGY_OF_MITOCHONDRION	HTT	ENSG00000197386
1173	C5	GO:BP	GOBP_POSITIVE_REGULATION_OF_AUTOPHAGY_OF_MITOCHONDRION	PARK7	ENSG00000116288
1174	C5	GO:BP	GOBP_POSITIVE_REGULATION_OF_AUTOPHAGY_OF_MITOCHONDRION	PRKN	ENSG00000185345
1175	C5	GO:BP	GOBP_POSITIVE_REGULATION_OF_AUTOPHAGY_OF_MITOCHONDRION	SLC25A4	ENSG00000151729
1176	C5	GO:BP	GOBP_POSITIVE_REGULATION_OF_AUTOPHAGY_OF_MITOCHONDRION	SLC25A5	ENSG00000005022
1177	C5	GO:BP	GOBP_POSITIVE_REGULATION_OF_AUTOPHAGY_OF_MITOCHONDRION	VDAC1	ENSG00000213585
1178	C5	GO:BP	GOBP_POSITIVE_REGULATION_OF_AUTOPHAGY_OF_MITOCHONDRION	VPS13D	ENSG00000048707
1179	C5	GO:BP	GOBP_POSITIVE_REGULATION_OF_MACROAUTOPHAGY	ADRB2	ENSG00000169252
1180	C5	GO:BP	GOBP_POSITIVE_REGULATION_OF_MACROAUTOPHAGY	AMBRA1	ENSG00000110497
1181	C5	GO:BP	GOBP_POSITIVE_REGULATION_OF_MACROAUTOPHAGY	ATG2A	ENSG00000110046
1182	C5	GO:BP	GOBP_POSITIVE_REGULATION_OF_MACROAUTOPHAGY	BAG3	ENSG00000151929
1183	C5	GO:BP	GOBP_POSITIVE_REGULATION_OF_MACROAUTOPHAGY	BECN1	ENSG00000126581
1184	C5	GO:BP	GOBP_POSITIVE_REGULATION_OF_MACROAUTOPHAGY	BNIP3	ENSG00000176171
1185	C5	GO:BP	GOBP_POSITIVE_REGULATION_OF_MACROAUTOPHAGY	BNIP3L	ENSG00000104765
1186	C5	GO:BP	GOBP_POSITIVE_REGULATION_OF_MACROAUTOPHAGY	C9orf72	ENSG00000147894
1187	C5	GO:BP	GOBP_POSITIVE_REGULATION_OF_MACROAUTOPHAGY	CALCOCO2	ENSG00000136436
1188	C5	GO:BP	GOBP_POSITIVE_REGULATION_OF_MACROAUTOPHAGY	CERS1	ENSG00000223802
1189	C5	GO:BP	GOBP_POSITIVE_REGULATION_OF_MACROAUTOPHAGY	DCN	ENSG00000011465
1190	C5	GO:BP	GOBP_POSITIVE_REGULATION_OF_MACROAUTOPHAGY	ELAPOR1	ENSG00000116299
1191	C5	GO:BP	GOBP_POSITIVE_REGULATION_OF_MACROAUTOPHAGY	EPM2A	ENSG00000112425
1192	C5	GO:BP	GOBP_POSITIVE_REGULATION_OF_MACROAUTOPHAGY	FYCO1	ENSG00000163820
1193	C5	GO:BP	GOBP_POSITIVE_REGULATION_OF_MACROAUTOPHAGY	GNAI3	ENSG00000065135
1194	C5	GO:BP	GOBP_POSITIVE_REGULATION_OF_MACROAUTOPHAGY	GPSM1	ENSG00000160360
1195	C5	GO:BP	GOBP_POSITIVE_REGULATION_OF_MACROAUTOPHAGY	HIF1A	ENSG00000100644
1196	C5	GO:BP	GOBP_POSITIVE_REGULATION_OF_MACROAUTOPHAGY	HMOX1	ENSG00000100292
1197	C5	GO:BP	GOBP_POSITIVE_REGULATION_OF_MACROAUTOPHAGY	HSPB8	ENSG00000152137
1198	C5	GO:BP	GOBP_POSITIVE_REGULATION_OF_MACROAUTOPHAGY	HTT	ENSG00000197386
1199	C5	GO:BP	GOBP_POSITIVE_REGULATION_OF_MACROAUTOPHAGY	IKBKG	ENSG00000269335
1200	C5	GO:BP	GOBP_POSITIVE_REGULATION_OF_MACROAUTOPHAGY	IL4	ENSG00000113520
1201	C5	GO:BP	GOBP_POSITIVE_REGULATION_OF_MACROAUTOPHAGY	IRGM	ENSG00000237693
1202	C5	GO:BP	GOBP_POSITIVE_REGULATION_OF_MACROAUTOPHAGY	KDR	ENSG00000128052
1203	C5	GO:BP	GOBP_POSITIVE_REGULATION_OF_MACROAUTOPHAGY	LACRT	ENSG00000135413
1204	C5	GO:BP	GOBP_POSITIVE_REGULATION_OF_MACROAUTOPHAGY	LARP1	ENSG00000155506
1205	C5	GO:BP	GOBP_POSITIVE_REGULATION_OF_MACROAUTOPHAGY	LRSAM1	ENSG00000148356
1206	C5	GO:BP	GOBP_POSITIVE_REGULATION_OF_MACROAUTOPHAGY	MAP3K7	ENSG00000135341
1207	C5	GO:BP	GOBP_POSITIVE_REGULATION_OF_MACROAUTOPHAGY	MAPK3	ENSG00000102882
1208	C5	GO:BP	GOBP_POSITIVE_REGULATION_OF_MACROAUTOPHAGY	MOAP1	ENSG00000165943
1209	C5	GO:BP	GOBP_POSITIVE_REGULATION_OF_MACROAUTOPHAGY	MOAP1	ENSG00000278268
1210	C5	GO:BP	GOBP_POSITIVE_REGULATION_OF_MACROAUTOPHAGY	NOD1	ENSG00000106100
1211	C5	GO:BP	GOBP_POSITIVE_REGULATION_OF_MACROAUTOPHAGY	NOD2	ENSG00000167207
1212	C5	GO:BP	GOBP_POSITIVE_REGULATION_OF_MACROAUTOPHAGY	OPTN	ENSG00000123240
1213	C5	GO:BP	GOBP_POSITIVE_REGULATION_OF_MACROAUTOPHAGY	PAFAH1B2	ENSG00000168092
1214	C5	GO:BP	GOBP_POSITIVE_REGULATION_OF_MACROAUTOPHAGY	PINK1	ENSG00000158828
1215	C5	GO:BP	GOBP_POSITIVE_REGULATION_OF_MACROAUTOPHAGY	PIP4K2A	ENSG00000150867
1216	C5	GO:BP	GOBP_POSITIVE_REGULATION_OF_MACROAUTOPHAGY	PIP4K2B	ENSG00000276293
1217	C5	GO:BP	GOBP_POSITIVE_REGULATION_OF_MACROAUTOPHAGY	PIP4K2B	ENSG00000277292
1218	C5	GO:BP	GOBP_POSITIVE_REGULATION_OF_MACROAUTOPHAGY	PIP4K2C	ENSG00000166908
853	C5	GO:BP	GOBP_NEGATIVE_REGULATION_OF_AUTOPHAGY	NUPR1	ENSG00000176046
1220	C5	GO:BP	GOBP_POSITIVE_REGULATION_OF_MACROAUTOPHAGY	RAB3GAP1	ENSG00000115839
1221	C5	GO:BP	GOBP_POSITIVE_REGULATION_OF_MACROAUTOPHAGY	RAB3GAP2	ENSG00000118873
1222	C5	GO:BP	GOBP_POSITIVE_REGULATION_OF_MACROAUTOPHAGY	RALB	ENSG00000144118
1223	C5	GO:BP	GOBP_POSITIVE_REGULATION_OF_MACROAUTOPHAGY	RIPK2	ENSG00000104312
1224	C5	GO:BP	GOBP_POSITIVE_REGULATION_OF_MACROAUTOPHAGY	RNF31	ENSG00000092098
1225	C5	GO:BP	GOBP_POSITIVE_REGULATION_OF_MACROAUTOPHAGY	RNF31	ENSG00000285152
1226	C5	GO:BP	GOBP_POSITIVE_REGULATION_OF_MACROAUTOPHAGY	RUFY4	ENSG00000188282
1227	C5	GO:BP	GOBP_POSITIVE_REGULATION_OF_MACROAUTOPHAGY	SCOC	ENSG00000153130
1228	C5	GO:BP	GOBP_POSITIVE_REGULATION_OF_MACROAUTOPHAGY	SESN1	ENSG00000080546
1229	C5	GO:BP	GOBP_POSITIVE_REGULATION_OF_MACROAUTOPHAGY	SESN2	ENSG00000130766
1230	C5	GO:BP	GOBP_POSITIVE_REGULATION_OF_MACROAUTOPHAGY	SESN2	ENSG00000285069
1231	C5	GO:BP	GOBP_POSITIVE_REGULATION_OF_MACROAUTOPHAGY	SESN3	ENSG00000149212
1232	C5	GO:BP	GOBP_POSITIVE_REGULATION_OF_MACROAUTOPHAGY	SH3GLB1	ENSG00000097033
1233	C5	GO:BP	GOBP_POSITIVE_REGULATION_OF_MACROAUTOPHAGY	SIRT1	ENSG00000096717
1234	C5	GO:BP	GOBP_POSITIVE_REGULATION_OF_MACROAUTOPHAGY	SLC25A4	ENSG00000151729
1235	C5	GO:BP	GOBP_POSITIVE_REGULATION_OF_MACROAUTOPHAGY	SLC25A5	ENSG00000005022
1236	C5	GO:BP	GOBP_POSITIVE_REGULATION_OF_MACROAUTOPHAGY	SMCR8	ENSG00000176994
1237	C5	GO:BP	GOBP_POSITIVE_REGULATION_OF_MACROAUTOPHAGY	SMCR8	ENSG00000283741
1238	C5	GO:BP	GOBP_POSITIVE_REGULATION_OF_MACROAUTOPHAGY	SNX18	ENSG00000178996
1239	C5	GO:BP	GOBP_POSITIVE_REGULATION_OF_MACROAUTOPHAGY	SNX30	ENSG00000148158
1240	C5	GO:BP	GOBP_POSITIVE_REGULATION_OF_MACROAUTOPHAGY	SNX4	ENSG00000114520
1241	C5	GO:BP	GOBP_POSITIVE_REGULATION_OF_MACROAUTOPHAGY	SNX7	ENSG00000162627
1242	C5	GO:BP	GOBP_POSITIVE_REGULATION_OF_MACROAUTOPHAGY	SPTLC1	ENSG00000090054
1243	C5	GO:BP	GOBP_POSITIVE_REGULATION_OF_MACROAUTOPHAGY	SPTLC2	ENSG00000100596
1244	C5	GO:BP	GOBP_POSITIVE_REGULATION_OF_MACROAUTOPHAGY	STING1	ENSG00000184584
1245	C5	GO:BP	GOBP_POSITIVE_REGULATION_OF_MACROAUTOPHAGY	STING1	ENSG00000288243
1246	C5	GO:BP	GOBP_POSITIVE_REGULATION_OF_MACROAUTOPHAGY	SUPT5H	ENSG00000196235
1247	C5	GO:BP	GOBP_POSITIVE_REGULATION_OF_MACROAUTOPHAGY	TBK1	ENSG00000183735
1248	C5	GO:BP	GOBP_POSITIVE_REGULATION_OF_MACROAUTOPHAGY	TRIM13	ENSG00000204977
1249	C5	GO:BP	GOBP_POSITIVE_REGULATION_OF_MACROAUTOPHAGY	TSC1	ENSG00000165699
1250	C5	GO:BP	GOBP_POSITIVE_REGULATION_OF_MACROAUTOPHAGY	TSC2	ENSG00000103197
1251	C5	GO:BP	GOBP_POSITIVE_REGULATION_OF_MACROAUTOPHAGY	ULK1	ENSG00000177169
1252	C5	GO:BP	GOBP_POSITIVE_REGULATION_OF_MACROAUTOPHAGY	UVRAG	ENSG00000198382
1253	C5	GO:BP	GOBP_POSITIVE_REGULATION_OF_MACROAUTOPHAGY	VDAC1	ENSG00000213585
1254	C5	GO:BP	GOBP_POSITIVE_REGULATION_OF_MACROAUTOPHAGY	VPS13D	ENSG00000048707
1255	C5	GO:BP	GOBP_POSITIVE_REGULATION_OF_MACROAUTOPHAGY	WAC	ENSG00000095787
1256	C5	GO:BP	GOBP_POSITIVE_REGULATION_OF_MACROAUTOPHAGY	WDR45	ENSG00000188378
1257	C5	GO:BP	GOBP_POSITIVE_REGULATION_OF_MACROAUTOPHAGY	WDR45	ENSG00000196998
1258	C5	GO:BP	GOBP_POSITIVE_REGULATION_OF_MACROAUTOPHAGY	WIPI1	ENSG00000070540
1259	C5	GO:BP	GOBP_POSITIVE_REGULATION_OF_MITOPHAGY	AMBRA1	ENSG00000110497
1260	C5	GO:BP	GOBP_POSITIVE_REGULATION_OF_MITOPHAGY	CERS1	ENSG00000223802
1261	C5	GO:BP	GOBP_POSITIVE_REGULATION_OF_MITOPHAGY	SLC25A4	ENSG00000151729
1262	C5	GO:BP	GOBP_POSITIVE_REGULATION_OF_MITOPHAGY	SLC25A5	ENSG00000005022
1263	C5	GO:BP	GOBP_POSITIVE_REGULATION_OF_MITOPHAGY	VDAC1	ENSG00000213585
1264	C5	GO:BP	GOBP_POSITIVE_REGULATION_OF_MITOPHAGY	VPS13D	ENSG00000048707
1265	C5	GO:BP	GOBP_POSITIVE_REGULATION_OF_MITOPHAGY_IN_RESPONSE_TO_MITOCHONDRIAL_DEPOLARIZATION	CDC37	ENSG00000105401
1266	C5	GO:BP	GOBP_POSITIVE_REGULATION_OF_MITOPHAGY_IN_RESPONSE_TO_MITOCHONDRIAL_DEPOLARIZATION	HDAC6	ENSG00000094631
1267	C5	GO:BP	GOBP_POSITIVE_REGULATION_OF_MITOPHAGY_IN_RESPONSE_TO_MITOCHONDRIAL_DEPOLARIZATION	HUWE1	ENSG00000086758
1268	C5	GO:BP	GOBP_POSITIVE_REGULATION_OF_MITOPHAGY_IN_RESPONSE_TO_MITOCHONDRIAL_DEPOLARIZATION	MFN2	ENSG00000116688
1269	C5	GO:BP	GOBP_POSITIVE_REGULATION_OF_MITOPHAGY_IN_RESPONSE_TO_MITOCHONDRIAL_DEPOLARIZATION	OPTN	ENSG00000123240
1270	C5	GO:BP	GOBP_POSITIVE_REGULATION_OF_MITOPHAGY_IN_RESPONSE_TO_MITOCHONDRIAL_DEPOLARIZATION	PINK1	ENSG00000158828
1271	C5	GO:BP	GOBP_POSITIVE_REGULATION_OF_MITOPHAGY_IN_RESPONSE_TO_MITOCHONDRIAL_DEPOLARIZATION	PRKN	ENSG00000185345
1272	C5	GO:BP	GOBP_POSITIVE_REGULATION_OF_MITOPHAGY_IN_RESPONSE_TO_MITOCHONDRIAL_DEPOLARIZATION	TOMM7	ENSG00000196683
1273	C5	GO:BP	GOBP_POSITIVE_REGULATION_OF_MITOPHAGY_IN_RESPONSE_TO_MITOCHONDRIAL_DEPOLARIZATION	VPS13C	ENSG00000129003
1274	C5	GO:BP	GOBP_REGULATION_OF_AUTOPHAGOSOME_MATURATION	ADRB2	ENSG00000169252
1275	C5	GO:BP	GOBP_REGULATION_OF_AUTOPHAGOSOME_MATURATION	ATG12	ENSG00000145782
1276	C5	GO:BP	GOBP_REGULATION_OF_AUTOPHAGOSOME_MATURATION	ATG5	ENSG00000057663
1277	C5	GO:BP	GOBP_REGULATION_OF_AUTOPHAGOSOME_MATURATION	CALCOCO2	ENSG00000136436
1278	C5	GO:BP	GOBP_REGULATION_OF_AUTOPHAGOSOME_MATURATION	CLEC16A	ENSG00000038532
1279	C5	GO:BP	GOBP_REGULATION_OF_AUTOPHAGOSOME_MATURATION	CLN3	ENSG00000188603
1280	C5	GO:BP	GOBP_REGULATION_OF_AUTOPHAGOSOME_MATURATION	FYCO1	ENSG00000163820
1281	C5	GO:BP	GOBP_REGULATION_OF_AUTOPHAGOSOME_MATURATION	IRGM	ENSG00000237693
1282	C5	GO:BP	GOBP_REGULATION_OF_AUTOPHAGOSOME_MATURATION	PHF23	ENSG00000040633
1283	C5	GO:BP	GOBP_REGULATION_OF_AUTOPHAGOSOME_MATURATION	RUBCN	ENSG00000145016
1284	C5	GO:BP	GOBP_REGULATION_OF_AUTOPHAGOSOME_MATURATION	SMCR8	ENSG00000176994
1285	C5	GO:BP	GOBP_REGULATION_OF_AUTOPHAGOSOME_MATURATION	SMCR8	ENSG00000283741
1286	C5	GO:BP	GOBP_REGULATION_OF_AUTOPHAGOSOME_MATURATION	TBC1D25	ENSG00000068354
1287	C5	GO:BP	GOBP_REGULATION_OF_AUTOPHAGOSOME_MATURATION	TECPR1	ENSG00000205356
1288	C5	GO:BP	GOBP_REGULATION_OF_AUTOPHAGOSOME_MATURATION	TMEM39A	ENSG00000176142
1289	C5	GO:BP	GOBP_REGULATION_OF_AUTOPHAGOSOME_MATURATION	UBQLN4	ENSG00000160803
1290	C5	GO:BP	GOBP_REGULATION_OF_AUTOPHAGOSOME_MATURATION	UVRAG	ENSG00000198382
1291	C5	GO:BP	GOBP_REGULATION_OF_AUTOPHAGY	ABL1	ENSG00000097007
1292	C5	GO:BP	GOBP_REGULATION_OF_AUTOPHAGY	ABL2	ENSG00000143322
1293	C5	GO:BP	GOBP_REGULATION_OF_AUTOPHAGY	ACER2	ENSG00000177076
1294	C5	GO:BP	GOBP_REGULATION_OF_AUTOPHAGY	ADRA1A	ENSG00000120907
1295	C5	GO:BP	GOBP_REGULATION_OF_AUTOPHAGY	ADRB2	ENSG00000169252
1296	C5	GO:BP	GOBP_REGULATION_OF_AUTOPHAGY	AKT1	ENSG00000142208
1297	C5	GO:BP	GOBP_REGULATION_OF_AUTOPHAGY	AMBRA1	ENSG00000110497
1298	C5	GO:BP	GOBP_REGULATION_OF_AUTOPHAGY	ATF6	ENSG00000118217
1299	C5	GO:BP	GOBP_REGULATION_OF_AUTOPHAGY	ATG12	ENSG00000145782
1300	C5	GO:BP	GOBP_REGULATION_OF_AUTOPHAGY	ATG14	ENSG00000126775
1301	C5	GO:BP	GOBP_REGULATION_OF_AUTOPHAGY	ATG16L1	ENSG00000085978
1302	C5	GO:BP	GOBP_REGULATION_OF_AUTOPHAGY	ATG16L1	ENSG00000281089
1303	C5	GO:BP	GOBP_REGULATION_OF_AUTOPHAGY	ATG2A	ENSG00000110046
1304	C5	GO:BP	GOBP_REGULATION_OF_AUTOPHAGY	ATG5	ENSG00000057663
1305	C5	GO:BP	GOBP_REGULATION_OF_AUTOPHAGY	ATG7	ENSG00000197548
1306	C5	GO:BP	GOBP_REGULATION_OF_AUTOPHAGY	ATM	ENSG00000149311
1307	C5	GO:BP	GOBP_REGULATION_OF_AUTOPHAGY	ATP13A2	ENSG00000159363
1308	C5	GO:BP	GOBP_REGULATION_OF_AUTOPHAGY	ATP6V0A1	ENSG00000033627
1309	C5	GO:BP	GOBP_REGULATION_OF_AUTOPHAGY	ATP6V0A2	ENSG00000185344
1310	C5	GO:BP	GOBP_REGULATION_OF_AUTOPHAGY	ATP6V0B	ENSG00000117410
1311	C5	GO:BP	GOBP_REGULATION_OF_AUTOPHAGY	ATP6V0C	ENSG00000185883
1312	C5	GO:BP	GOBP_REGULATION_OF_AUTOPHAGY	ATP6V0D1	ENSG00000159720
1313	C5	GO:BP	GOBP_REGULATION_OF_AUTOPHAGY	ATP6V0D2	ENSG00000147614
1314	C5	GO:BP	GOBP_REGULATION_OF_AUTOPHAGY	ATP6V0E1	ENSG00000113732
1315	C5	GO:BP	GOBP_REGULATION_OF_AUTOPHAGY	ATP6V0E2	ENSG00000171130
1316	C5	GO:BP	GOBP_REGULATION_OF_AUTOPHAGY	ATP6V1A	ENSG00000114573
1317	C5	GO:BP	GOBP_REGULATION_OF_AUTOPHAGY	ATP6V1B1	ENSG00000116039
1318	C5	GO:BP	GOBP_REGULATION_OF_AUTOPHAGY	ATP6V1B2	ENSG00000147416
1319	C5	GO:BP	GOBP_REGULATION_OF_AUTOPHAGY	ATP6V1C1	ENSG00000155097
1320	C5	GO:BP	GOBP_REGULATION_OF_AUTOPHAGY	ATP6V1C2	ENSG00000143882
1321	C5	GO:BP	GOBP_REGULATION_OF_AUTOPHAGY	ATP6V1D	ENSG00000100554
1322	C5	GO:BP	GOBP_REGULATION_OF_AUTOPHAGY	ATP6V1E1	ENSG00000131100
1323	C5	GO:BP	GOBP_REGULATION_OF_AUTOPHAGY	ATP6V1E2	ENSG00000250565
1324	C5	GO:BP	GOBP_REGULATION_OF_AUTOPHAGY	ATP6V1G1	ENSG00000136888
1325	C5	GO:BP	GOBP_REGULATION_OF_AUTOPHAGY	ATP6V1G2	ENSG00000206334
1326	C5	GO:BP	GOBP_REGULATION_OF_AUTOPHAGY	ATP6V1G2	ENSG00000206445
1327	C5	GO:BP	GOBP_REGULATION_OF_AUTOPHAGY	ATP6V1G2	ENSG00000213760
1328	C5	GO:BP	GOBP_REGULATION_OF_AUTOPHAGY	ATP6V1G2	ENSG00000226850
1329	C5	GO:BP	GOBP_REGULATION_OF_AUTOPHAGY	ATP6V1G2	ENSG00000227587
1330	C5	GO:BP	GOBP_REGULATION_OF_AUTOPHAGY	ATP6V1G2	ENSG00000230900
1331	C5	GO:BP	GOBP_REGULATION_OF_AUTOPHAGY	ATP6V1G2	ENSG00000234668
1332	C5	GO:BP	GOBP_REGULATION_OF_AUTOPHAGY	ATP6V1G2	ENSG00000234920
1333	C5	GO:BP	GOBP_REGULATION_OF_AUTOPHAGY	ATP6V1H	ENSG00000047249
1334	C5	GO:BP	GOBP_REGULATION_OF_AUTOPHAGY	BAD	ENSG00000002330
1335	C5	GO:BP	GOBP_REGULATION_OF_AUTOPHAGY	BAG3	ENSG00000151929
1336	C5	GO:BP	GOBP_REGULATION_OF_AUTOPHAGY	BCL2	ENSG00000171791
1337	C5	GO:BP	GOBP_REGULATION_OF_AUTOPHAGY	BCL2L11	ENSG00000153094
1338	C5	GO:BP	GOBP_REGULATION_OF_AUTOPHAGY	BECN1	ENSG00000126581
1339	C5	GO:BP	GOBP_REGULATION_OF_AUTOPHAGY	BMF	ENSG00000104081
1340	C5	GO:BP	GOBP_REGULATION_OF_AUTOPHAGY	BNIP3	ENSG00000176171
1341	C5	GO:BP	GOBP_REGULATION_OF_AUTOPHAGY	BNIP3L	ENSG00000104765
1342	C5	GO:BP	GOBP_REGULATION_OF_AUTOPHAGY	BOK	ENSG00000176720
1343	C5	GO:BP	GOBP_REGULATION_OF_AUTOPHAGY	C9orf72	ENSG00000147894
1344	C5	GO:BP	GOBP_REGULATION_OF_AUTOPHAGY	CALCOCO2	ENSG00000136436
1345	C5	GO:BP	GOBP_REGULATION_OF_AUTOPHAGY	CAMKK2	ENSG00000110931
1346	C5	GO:BP	GOBP_REGULATION_OF_AUTOPHAGY	CAPN1	ENSG00000014216
1347	C5	GO:BP	GOBP_REGULATION_OF_AUTOPHAGY	CAPNS1	ENSG00000126247
1348	C5	GO:BP	GOBP_REGULATION_OF_AUTOPHAGY	CASP3	ENSG00000164305
1349	C5	GO:BP	GOBP_REGULATION_OF_AUTOPHAGY	CDK5	ENSG00000164885
1350	C5	GO:BP	GOBP_REGULATION_OF_AUTOPHAGY	CDK5R1	ENSG00000176749
1351	C5	GO:BP	GOBP_REGULATION_OF_AUTOPHAGY	CERS1	ENSG00000223802
1352	C5	GO:BP	GOBP_REGULATION_OF_AUTOPHAGY	CHMP4A	ENSG00000254505
1353	C5	GO:BP	GOBP_REGULATION_OF_AUTOPHAGY	CHMP4A	ENSG00000285302
1354	C5	GO:BP	GOBP_REGULATION_OF_AUTOPHAGY	CHMP4B	ENSG00000101421
1355	C5	GO:BP	GOBP_REGULATION_OF_AUTOPHAGY	CISD1	ENSG00000122873
1356	C5	GO:BP	GOBP_REGULATION_OF_AUTOPHAGY	CISD2	ENSG00000145354
1357	C5	GO:BP	GOBP_REGULATION_OF_AUTOPHAGY	CLEC16A	ENSG00000038532
1358	C5	GO:BP	GOBP_REGULATION_OF_AUTOPHAGY	CLN3	ENSG00000188603
1359	C5	GO:BP	GOBP_REGULATION_OF_AUTOPHAGY	CPTP	ENSG00000224051
1360	C5	GO:BP	GOBP_REGULATION_OF_AUTOPHAGY	CRYBA1	ENSG00000108255
1361	C5	GO:BP	GOBP_REGULATION_OF_AUTOPHAGY	CSNK2A2	ENSG00000070770
1362	C5	GO:BP	GOBP_REGULATION_OF_AUTOPHAGY	CTSA	ENSG00000064601
1363	C5	GO:BP	GOBP_REGULATION_OF_AUTOPHAGY	CTTN	ENSG00000085733
1364	C5	GO:BP	GOBP_REGULATION_OF_AUTOPHAGY	CTTN	ENSG00000288401
1365	C5	GO:BP	GOBP_REGULATION_OF_AUTOPHAGY	DAP	ENSG00000112977
1366	C5	GO:BP	GOBP_REGULATION_OF_AUTOPHAGY	DAPK1	ENSG00000196730
1367	C5	GO:BP	GOBP_REGULATION_OF_AUTOPHAGY	DAPK2	ENSG00000035664
1368	C5	GO:BP	GOBP_REGULATION_OF_AUTOPHAGY	DAPK3	ENSG00000167657
1369	C5	GO:BP	GOBP_REGULATION_OF_AUTOPHAGY	DAPL1	ENSG00000163331
1370	C5	GO:BP	GOBP_REGULATION_OF_AUTOPHAGY	DCAF12	ENSG00000198876
1371	C5	GO:BP	GOBP_REGULATION_OF_AUTOPHAGY	DCN	ENSG00000011465
1372	C5	GO:BP	GOBP_REGULATION_OF_AUTOPHAGY	DDIT3	ENSG00000175197
1373	C5	GO:BP	GOBP_REGULATION_OF_AUTOPHAGY	DEPDC5	ENSG00000100150
1374	C5	GO:BP	GOBP_REGULATION_OF_AUTOPHAGY	DEPP1	ENSG00000165507
1375	C5	GO:BP	GOBP_REGULATION_OF_AUTOPHAGY	DHRSX	ENSG00000169084
1376	C5	GO:BP	GOBP_REGULATION_OF_AUTOPHAGY	DNM1L	ENSG00000087470
1377	C5	GO:BP	GOBP_REGULATION_OF_AUTOPHAGY	DRAM1	ENSG00000136048
1378	C5	GO:BP	GOBP_REGULATION_OF_AUTOPHAGY	DRAM2	ENSG00000156171
1379	C5	GO:BP	GOBP_REGULATION_OF_AUTOPHAGY	EEF1A1	ENSG00000156508
927	C5	GO:BP	GOBP_NEGATIVE_REGULATION_OF_MACROAUTOPHAGY	NUPR1	ENSG00000176046
1381	C5	GO:BP	GOBP_REGULATION_OF_AUTOPHAGY	EHMT2	ENSG00000204371
1382	C5	GO:BP	GOBP_REGULATION_OF_AUTOPHAGY	EHMT2	ENSG00000206376
1383	C5	GO:BP	GOBP_REGULATION_OF_AUTOPHAGY	EHMT2	ENSG00000224143
1384	C5	GO:BP	GOBP_REGULATION_OF_AUTOPHAGY	EHMT2	ENSG00000227333
1385	C5	GO:BP	GOBP_REGULATION_OF_AUTOPHAGY	EHMT2	ENSG00000232045
1386	C5	GO:BP	GOBP_REGULATION_OF_AUTOPHAGY	EHMT2	ENSG00000236759
1387	C5	GO:BP	GOBP_REGULATION_OF_AUTOPHAGY	EHMT2	ENSG00000238134
1388	C5	GO:BP	GOBP_REGULATION_OF_AUTOPHAGY	EIF4E	ENSG00000151247
1389	C5	GO:BP	GOBP_REGULATION_OF_AUTOPHAGY	EIF4G1	ENSG00000114867
1390	C5	GO:BP	GOBP_REGULATION_OF_AUTOPHAGY	EIF4G2	ENSG00000110321
1391	C5	GO:BP	GOBP_REGULATION_OF_AUTOPHAGY	EIF4G3	ENSG00000075151
1392	C5	GO:BP	GOBP_REGULATION_OF_AUTOPHAGY	ELAPOR1	ENSG00000116299
1393	C5	GO:BP	GOBP_REGULATION_OF_AUTOPHAGY	ENDOG	ENSG00000167136
1394	C5	GO:BP	GOBP_REGULATION_OF_AUTOPHAGY	EP300	ENSG00000100393
1395	C5	GO:BP	GOBP_REGULATION_OF_AUTOPHAGY	EPM2A	ENSG00000112425
1396	C5	GO:BP	GOBP_REGULATION_OF_AUTOPHAGY	ERCC4	ENSG00000175595
1397	C5	GO:BP	GOBP_REGULATION_OF_AUTOPHAGY	ERN1	ENSG00000178607
1398	C5	GO:BP	GOBP_REGULATION_OF_AUTOPHAGY	EXOC1	ENSG00000090989
1399	C5	GO:BP	GOBP_REGULATION_OF_AUTOPHAGY	EXOC4	ENSG00000131558
1400	C5	GO:BP	GOBP_REGULATION_OF_AUTOPHAGY	EXOC7	ENSG00000182473
1401	C5	GO:BP	GOBP_REGULATION_OF_AUTOPHAGY	EXOC8	ENSG00000116903
1402	C5	GO:BP	GOBP_REGULATION_OF_AUTOPHAGY	FBXL2	ENSG00000153558
1403	C5	GO:BP	GOBP_REGULATION_OF_AUTOPHAGY	FBXO7	ENSG00000100225
1404	C5	GO:BP	GOBP_REGULATION_OF_AUTOPHAGY	FBXW7	ENSG00000109670
1405	C5	GO:BP	GOBP_REGULATION_OF_AUTOPHAGY	FEZ1	ENSG00000149557
1406	C5	GO:BP	GOBP_REGULATION_OF_AUTOPHAGY	FEZ2	ENSG00000171055
1407	C5	GO:BP	GOBP_REGULATION_OF_AUTOPHAGY	FLCN	ENSG00000154803
1408	C5	GO:BP	GOBP_REGULATION_OF_AUTOPHAGY	FOXK1	ENSG00000164916
1409	C5	GO:BP	GOBP_REGULATION_OF_AUTOPHAGY	FOXK2	ENSG00000141568
1410	C5	GO:BP	GOBP_REGULATION_OF_AUTOPHAGY	FOXO1	ENSG00000150907
1411	C5	GO:BP	GOBP_REGULATION_OF_AUTOPHAGY	FOXO3	ENSG00000118689
1412	C5	GO:BP	GOBP_REGULATION_OF_AUTOPHAGY	FYCO1	ENSG00000163820
1413	C5	GO:BP	GOBP_REGULATION_OF_AUTOPHAGY	FZD5	ENSG00000163251
1414	C5	GO:BP	GOBP_REGULATION_OF_AUTOPHAGY	GAPDH	ENSG00000111640
1415	C5	GO:BP	GOBP_REGULATION_OF_AUTOPHAGY	GATA4	ENSG00000136574
1416	C5	GO:BP	GOBP_REGULATION_OF_AUTOPHAGY	GATA4	ENSG00000285109
1417	C5	GO:BP	GOBP_REGULATION_OF_AUTOPHAGY	GBA	ENSG00000177628
1418	C5	GO:BP	GOBP_REGULATION_OF_AUTOPHAGY	GBA	ENSG00000262446
1419	C5	GO:BP	GOBP_REGULATION_OF_AUTOPHAGY	GFAP	ENSG00000131095
1420	C5	GO:BP	GOBP_REGULATION_OF_AUTOPHAGY	GNAI3	ENSG00000065135
1421	C5	GO:BP	GOBP_REGULATION_OF_AUTOPHAGY	GOLGA2	ENSG00000167110
1422	C5	GO:BP	GOBP_REGULATION_OF_AUTOPHAGY	GPR137	ENSG00000173264
1423	C5	GO:BP	GOBP_REGULATION_OF_AUTOPHAGY	GPR137B	ENSG00000077585
1424	C5	GO:BP	GOBP_REGULATION_OF_AUTOPHAGY	GPSM1	ENSG00000160360
1425	C5	GO:BP	GOBP_REGULATION_OF_AUTOPHAGY	GSK3A	ENSG00000105723
1426	C5	GO:BP	GOBP_REGULATION_OF_AUTOPHAGY	GSK3B	ENSG00000082701
1427	C5	GO:BP	GOBP_REGULATION_OF_AUTOPHAGY	HAX1	ENSG00000143575
1428	C5	GO:BP	GOBP_REGULATION_OF_AUTOPHAGY	HDAC6	ENSG00000094631
1429	C5	GO:BP	GOBP_REGULATION_OF_AUTOPHAGY	HERC1	ENSG00000103657
1430	C5	GO:BP	GOBP_REGULATION_OF_AUTOPHAGY	HGF	ENSG00000019991
1431	C5	GO:BP	GOBP_REGULATION_OF_AUTOPHAGY	HIF1A	ENSG00000100644
1432	C5	GO:BP	GOBP_REGULATION_OF_AUTOPHAGY	HMGB1	ENSG00000189403
1433	C5	GO:BP	GOBP_REGULATION_OF_AUTOPHAGY	HMOX1	ENSG00000100292
1434	C5	GO:BP	GOBP_REGULATION_OF_AUTOPHAGY	HSPB1	ENSG00000106211
1435	C5	GO:BP	GOBP_REGULATION_OF_AUTOPHAGY	HSPB8	ENSG00000152137
1436	C5	GO:BP	GOBP_REGULATION_OF_AUTOPHAGY	HTR2B	ENSG00000135914
1437	C5	GO:BP	GOBP_REGULATION_OF_AUTOPHAGY	HTRA2	ENSG00000115317
1438	C5	GO:BP	GOBP_REGULATION_OF_AUTOPHAGY	HTT	ENSG00000197386
1439	C5	GO:BP	GOBP_REGULATION_OF_AUTOPHAGY	IFI16	ENSG00000163565
1440	C5	GO:BP	GOBP_REGULATION_OF_AUTOPHAGY	IFNG	ENSG00000111537
1441	C5	GO:BP	GOBP_REGULATION_OF_AUTOPHAGY	IKBKG	ENSG00000269335
1442	C5	GO:BP	GOBP_REGULATION_OF_AUTOPHAGY	IL10	ENSG00000136634
1443	C5	GO:BP	GOBP_REGULATION_OF_AUTOPHAGY	IL10RA	ENSG00000110324
1444	C5	GO:BP	GOBP_REGULATION_OF_AUTOPHAGY	IL4	ENSG00000113520
1445	C5	GO:BP	GOBP_REGULATION_OF_AUTOPHAGY	IRGM	ENSG00000237693
1446	C5	GO:BP	GOBP_REGULATION_OF_AUTOPHAGY	ITPR1	ENSG00000150995
1447	C5	GO:BP	GOBP_REGULATION_OF_AUTOPHAGY	KAT5	ENSG00000172977
1448	C5	GO:BP	GOBP_REGULATION_OF_AUTOPHAGY	KAT8	ENSG00000103510
1449	C5	GO:BP	GOBP_REGULATION_OF_AUTOPHAGY	KDM4A	ENSG00000066135
1450	C5	GO:BP	GOBP_REGULATION_OF_AUTOPHAGY	KDR	ENSG00000128052
1451	C5	GO:BP	GOBP_REGULATION_OF_AUTOPHAGY	KEAP1	ENSG00000079999
1452	C5	GO:BP	GOBP_REGULATION_OF_AUTOPHAGY	KIF25	ENSG00000125337
1453	C5	GO:BP	GOBP_REGULATION_OF_AUTOPHAGY	KLHL22	ENSG00000099910
1454	C5	GO:BP	GOBP_REGULATION_OF_AUTOPHAGY	LACRT	ENSG00000135413
1455	C5	GO:BP	GOBP_REGULATION_OF_AUTOPHAGY	LAMP3	ENSG00000078081
1456	C5	GO:BP	GOBP_REGULATION_OF_AUTOPHAGY	LARP1	ENSG00000155506
1457	C5	GO:BP	GOBP_REGULATION_OF_AUTOPHAGY	LEP	ENSG00000174697
1458	C5	GO:BP	GOBP_REGULATION_OF_AUTOPHAGY	LEPR	ENSG00000116678
1459	C5	GO:BP	GOBP_REGULATION_OF_AUTOPHAGY	LRRK2	ENSG00000188906
1460	C5	GO:BP	GOBP_REGULATION_OF_AUTOPHAGY	LRSAM1	ENSG00000148356
1461	C5	GO:BP	GOBP_REGULATION_OF_AUTOPHAGY	LZTS1	ENSG00000061337
1462	C5	GO:BP	GOBP_REGULATION_OF_AUTOPHAGY	MAGEA3	ENSG00000221867
1463	C5	GO:BP	GOBP_REGULATION_OF_AUTOPHAGY	MAGEA6	ENSG00000197172
1464	C5	GO:BP	GOBP_REGULATION_OF_AUTOPHAGY	MAP3K7	ENSG00000135341
1465	C5	GO:BP	GOBP_REGULATION_OF_AUTOPHAGY	MAPK15	ENSG00000181085
1466	C5	GO:BP	GOBP_REGULATION_OF_AUTOPHAGY	MAPK15	ENSG00000274205
1467	C5	GO:BP	GOBP_REGULATION_OF_AUTOPHAGY	MAPK3	ENSG00000102882
1468	C5	GO:BP	GOBP_REGULATION_OF_AUTOPHAGY	MAPK8	ENSG00000107643
1499	C5	GO:BP	GOBP_REGULATION_OF_AUTOPHAGY	NUPR1	ENSG00000176046
1841	C5	GO:BP	GOBP_REGULATION_OF_MACROAUTOPHAGY	NUPR1	ENSG00000176046
574	C5	GO:BP	GOBP_MACROAUTOPHAGY	PRKAA2	ENSG00000162409
1472	C5	GO:BP	GOBP_REGULATION_OF_AUTOPHAGY	MCL1	ENSG00000143384
1473	C5	GO:BP	GOBP_REGULATION_OF_AUTOPHAGY	MEFV	ENSG00000103313
1474	C5	GO:BP	GOBP_REGULATION_OF_AUTOPHAGY	MET	ENSG00000105976
1475	C5	GO:BP	GOBP_REGULATION_OF_AUTOPHAGY	MFSD8	ENSG00000164073
1476	C5	GO:BP	GOBP_REGULATION_OF_AUTOPHAGY	MID2	ENSG00000080561
1477	C5	GO:BP	GOBP_REGULATION_OF_AUTOPHAGY	MIR199A1	ENSG00000207752
1478	C5	GO:BP	GOBP_REGULATION_OF_AUTOPHAGY	MIRLET7B	ENSG00000284520
1479	C5	GO:BP	GOBP_REGULATION_OF_AUTOPHAGY	MOAP1	ENSG00000165943
1480	C5	GO:BP	GOBP_REGULATION_OF_AUTOPHAGY	MOAP1	ENSG00000278268
1481	C5	GO:BP	GOBP_REGULATION_OF_AUTOPHAGY	MT3	ENSG00000087250
1482	C5	GO:BP	GOBP_REGULATION_OF_AUTOPHAGY	MTCL1	ENSG00000168502
1483	C5	GO:BP	GOBP_REGULATION_OF_AUTOPHAGY	MTDH	ENSG00000147649
1484	C5	GO:BP	GOBP_REGULATION_OF_AUTOPHAGY	MTM1	ENSG00000171100
1485	C5	GO:BP	GOBP_REGULATION_OF_AUTOPHAGY	MTMR3	ENSG00000100330
1486	C5	GO:BP	GOBP_REGULATION_OF_AUTOPHAGY	MTMR4	ENSG00000108389
1487	C5	GO:BP	GOBP_REGULATION_OF_AUTOPHAGY	MTMR8	ENSG00000102043
1488	C5	GO:BP	GOBP_REGULATION_OF_AUTOPHAGY	MTMR9	ENSG00000104643
1489	C5	GO:BP	GOBP_REGULATION_OF_AUTOPHAGY	MTMR9	ENSG00000285032
1490	C5	GO:BP	GOBP_REGULATION_OF_AUTOPHAGY	MTOR	ENSG00000198793
1491	C5	GO:BP	GOBP_REGULATION_OF_AUTOPHAGY	NEDD4	ENSG00000069869
1492	C5	GO:BP	GOBP_REGULATION_OF_AUTOPHAGY	NLRP6	ENSG00000174885
1493	C5	GO:BP	GOBP_REGULATION_OF_AUTOPHAGY	NOD1	ENSG00000106100
1494	C5	GO:BP	GOBP_REGULATION_OF_AUTOPHAGY	NOD2	ENSG00000167207
1495	C5	GO:BP	GOBP_REGULATION_OF_AUTOPHAGY	NPC1	ENSG00000141458
1496	C5	GO:BP	GOBP_REGULATION_OF_AUTOPHAGY	NPRL2	ENSG00000114388
1497	C5	GO:BP	GOBP_REGULATION_OF_AUTOPHAGY	NPRL3	ENSG00000103148
1498	C5	GO:BP	GOBP_REGULATION_OF_AUTOPHAGY	NRBP2	ENSG00000185189
1090	C5	GO:BP	GOBP_POSITIVE_REGULATION_OF_AUTOPHAGY	PRKAA2	ENSG00000162409
1500	C5	GO:BP	GOBP_REGULATION_OF_AUTOPHAGY	OPTN	ENSG00000123240
1501	C5	GO:BP	GOBP_REGULATION_OF_AUTOPHAGY	ORMDL3	ENSG00000172057
1502	C5	GO:BP	GOBP_REGULATION_OF_AUTOPHAGY	OSBPL7	ENSG00000006025
1503	C5	GO:BP	GOBP_REGULATION_OF_AUTOPHAGY	PAFAH1B2	ENSG00000168092
1504	C5	GO:BP	GOBP_REGULATION_OF_AUTOPHAGY	PARK7	ENSG00000116288
1505	C5	GO:BP	GOBP_REGULATION_OF_AUTOPHAGY	PARL	ENSG00000175193
1506	C5	GO:BP	GOBP_REGULATION_OF_AUTOPHAGY	PHF23	ENSG00000040633
1507	C5	GO:BP	GOBP_REGULATION_OF_AUTOPHAGY	PIK3C2A	ENSG00000011405
1508	C5	GO:BP	GOBP_REGULATION_OF_AUTOPHAGY	PIK3C3	ENSG00000078142
1509	C5	GO:BP	GOBP_REGULATION_OF_AUTOPHAGY	PIK3CA	ENSG00000121879
1510	C5	GO:BP	GOBP_REGULATION_OF_AUTOPHAGY	PIK3CB	ENSG00000051382
1511	C5	GO:BP	GOBP_REGULATION_OF_AUTOPHAGY	PIK3R2	ENSG00000105647
1512	C5	GO:BP	GOBP_REGULATION_OF_AUTOPHAGY	PIK3R4	ENSG00000196455
1513	C5	GO:BP	GOBP_REGULATION_OF_AUTOPHAGY	PIM2	ENSG00000102096
1514	C5	GO:BP	GOBP_REGULATION_OF_AUTOPHAGY	PINK1	ENSG00000158828
1515	C5	GO:BP	GOBP_REGULATION_OF_AUTOPHAGY	PIP4K2A	ENSG00000150867
1516	C5	GO:BP	GOBP_REGULATION_OF_AUTOPHAGY	PIP4K2B	ENSG00000276293
1517	C5	GO:BP	GOBP_REGULATION_OF_AUTOPHAGY	PIP4K2B	ENSG00000277292
1518	C5	GO:BP	GOBP_REGULATION_OF_AUTOPHAGY	PIP4K2C	ENSG00000166908
1519	C5	GO:BP	GOBP_REGULATION_OF_AUTOPHAGY	PLEKHF1	ENSG00000166289
1520	C5	GO:BP	GOBP_REGULATION_OF_AUTOPHAGY	PLK2	ENSG00000145632
1521	C5	GO:BP	GOBP_REGULATION_OF_AUTOPHAGY	PLK3	ENSG00000173846
1522	C5	GO:BP	GOBP_REGULATION_OF_AUTOPHAGY	POLDIP2	ENSG00000004142
1523	C5	GO:BP	GOBP_REGULATION_OF_AUTOPHAGY	PRKAA1	ENSG00000132356
1219	C5	GO:BP	GOBP_POSITIVE_REGULATION_OF_MACROAUTOPHAGY	PRKAA2	ENSG00000162409
1525	C5	GO:BP	GOBP_REGULATION_OF_AUTOPHAGY	PRKACA	ENSG00000072062
1526	C5	GO:BP	GOBP_REGULATION_OF_AUTOPHAGY	PRKACA	ENSG00000288516
1527	C5	GO:BP	GOBP_REGULATION_OF_AUTOPHAGY	PRKD1	ENSG00000184304
1528	C5	GO:BP	GOBP_REGULATION_OF_AUTOPHAGY	PRKN	ENSG00000185345
1529	C5	GO:BP	GOBP_REGULATION_OF_AUTOPHAGY	PSAP	ENSG00000197746
1530	C5	GO:BP	GOBP_REGULATION_OF_AUTOPHAGY	PTPN22	ENSG00000134242
1531	C5	GO:BP	GOBP_REGULATION_OF_AUTOPHAGY	PYCARD	ENSG00000103490
1532	C5	GO:BP	GOBP_REGULATION_OF_AUTOPHAGY	QSOX1	ENSG00000116260
1533	C5	GO:BP	GOBP_REGULATION_OF_AUTOPHAGY	RAB39B	ENSG00000155961
1534	C5	GO:BP	GOBP_REGULATION_OF_AUTOPHAGY	RAB3GAP1	ENSG00000115839
1535	C5	GO:BP	GOBP_REGULATION_OF_AUTOPHAGY	RAB3GAP2	ENSG00000118873
1536	C5	GO:BP	GOBP_REGULATION_OF_AUTOPHAGY	RAB8A	ENSG00000167461
1537	C5	GO:BP	GOBP_REGULATION_OF_AUTOPHAGY	RALB	ENSG00000144118
1538	C5	GO:BP	GOBP_REGULATION_OF_AUTOPHAGY	RASIP1	ENSG00000105538
1539	C5	GO:BP	GOBP_REGULATION_OF_AUTOPHAGY	RHEB	ENSG00000106615
1540	C5	GO:BP	GOBP_REGULATION_OF_AUTOPHAGY	RIPK2	ENSG00000104312
1541	C5	GO:BP	GOBP_REGULATION_OF_AUTOPHAGY	RMC1	ENSG00000141452
1542	C5	GO:BP	GOBP_REGULATION_OF_AUTOPHAGY	RNF152	ENSG00000176641
1543	C5	GO:BP	GOBP_REGULATION_OF_AUTOPHAGY	RNF31	ENSG00000092098
1544	C5	GO:BP	GOBP_REGULATION_OF_AUTOPHAGY	RNF31	ENSG00000285152
1545	C5	GO:BP	GOBP_REGULATION_OF_AUTOPHAGY	RNF41	ENSG00000181852
1546	C5	GO:BP	GOBP_REGULATION_OF_AUTOPHAGY	RNF5	ENSG00000183574
1547	C5	GO:BP	GOBP_REGULATION_OF_AUTOPHAGY	RNF5	ENSG00000204308
1548	C5	GO:BP	GOBP_REGULATION_OF_AUTOPHAGY	RNF5	ENSG00000223767
1549	C5	GO:BP	GOBP_REGULATION_OF_AUTOPHAGY	RNF5	ENSG00000225452
1550	C5	GO:BP	GOBP_REGULATION_OF_AUTOPHAGY	RNF5	ENSG00000227277
1551	C5	GO:BP	GOBP_REGULATION_OF_AUTOPHAGY	RNF5	ENSG00000228405
1552	C5	GO:BP	GOBP_REGULATION_OF_AUTOPHAGY	RNF5	ENSG00000228907
1553	C5	GO:BP	GOBP_REGULATION_OF_AUTOPHAGY	ROCK1	ENSG00000067900
1554	C5	GO:BP	GOBP_REGULATION_OF_AUTOPHAGY	RPTOR	ENSG00000141564
1555	C5	GO:BP	GOBP_REGULATION_OF_AUTOPHAGY	RRAGA	ENSG00000155876
1556	C5	GO:BP	GOBP_REGULATION_OF_AUTOPHAGY	RRAGB	ENSG00000083750
1557	C5	GO:BP	GOBP_REGULATION_OF_AUTOPHAGY	RRAGC	ENSG00000116954
1558	C5	GO:BP	GOBP_REGULATION_OF_AUTOPHAGY	RRAGD	ENSG00000025039
1559	C5	GO:BP	GOBP_REGULATION_OF_AUTOPHAGY	RUBCN	ENSG00000145016
1560	C5	GO:BP	GOBP_REGULATION_OF_AUTOPHAGY	RUFY4	ENSG00000188282
1561	C5	GO:BP	GOBP_REGULATION_OF_AUTOPHAGY	SCFD1	ENSG00000092108
1562	C5	GO:BP	GOBP_REGULATION_OF_AUTOPHAGY	SCOC	ENSG00000153130
1563	C5	GO:BP	GOBP_REGULATION_OF_AUTOPHAGY	SEC22B	ENSG00000265808
1564	C5	GO:BP	GOBP_REGULATION_OF_AUTOPHAGY	SESN1	ENSG00000080546
1565	C5	GO:BP	GOBP_REGULATION_OF_AUTOPHAGY	SESN2	ENSG00000130766
1566	C5	GO:BP	GOBP_REGULATION_OF_AUTOPHAGY	SESN2	ENSG00000285069
1567	C5	GO:BP	GOBP_REGULATION_OF_AUTOPHAGY	SESN3	ENSG00000149212
1568	C5	GO:BP	GOBP_REGULATION_OF_AUTOPHAGY	SH3BP4	ENSG00000130147
1569	C5	GO:BP	GOBP_REGULATION_OF_AUTOPHAGY	SH3GLB1	ENSG00000097033
1570	C5	GO:BP	GOBP_REGULATION_OF_AUTOPHAGY	SIRT1	ENSG00000096717
1571	C5	GO:BP	GOBP_REGULATION_OF_AUTOPHAGY	SIRT2	ENSG00000068903
1572	C5	GO:BP	GOBP_REGULATION_OF_AUTOPHAGY	SIRT2	ENSG00000283100
1573	C5	GO:BP	GOBP_REGULATION_OF_AUTOPHAGY	SLC25A4	ENSG00000151729
1574	C5	GO:BP	GOBP_REGULATION_OF_AUTOPHAGY	SLC25A5	ENSG00000005022
1575	C5	GO:BP	GOBP_REGULATION_OF_AUTOPHAGY	SMCR8	ENSG00000176994
1576	C5	GO:BP	GOBP_REGULATION_OF_AUTOPHAGY	SMCR8	ENSG00000283741
1577	C5	GO:BP	GOBP_REGULATION_OF_AUTOPHAGY	SMG1	ENSG00000157106
1578	C5	GO:BP	GOBP_REGULATION_OF_AUTOPHAGY	SNCA	ENSG00000145335
1579	C5	GO:BP	GOBP_REGULATION_OF_AUTOPHAGY	SNRNP70	ENSG00000104852
1580	C5	GO:BP	GOBP_REGULATION_OF_AUTOPHAGY	SNX18	ENSG00000178996
1581	C5	GO:BP	GOBP_REGULATION_OF_AUTOPHAGY	SNX30	ENSG00000148158
1582	C5	GO:BP	GOBP_REGULATION_OF_AUTOPHAGY	SNX32	ENSG00000172803
1583	C5	GO:BP	GOBP_REGULATION_OF_AUTOPHAGY	SNX4	ENSG00000114520
1584	C5	GO:BP	GOBP_REGULATION_OF_AUTOPHAGY	SNX5	ENSG00000089006
1585	C5	GO:BP	GOBP_REGULATION_OF_AUTOPHAGY	SNX6	ENSG00000129515
1586	C5	GO:BP	GOBP_REGULATION_OF_AUTOPHAGY	SNX7	ENSG00000162627
1587	C5	GO:BP	GOBP_REGULATION_OF_AUTOPHAGY	SOGA1	ENSG00000149639
1588	C5	GO:BP	GOBP_REGULATION_OF_AUTOPHAGY	SOGA3	ENSG00000214338
1589	C5	GO:BP	GOBP_REGULATION_OF_AUTOPHAGY	SPTLC1	ENSG00000090054
1590	C5	GO:BP	GOBP_REGULATION_OF_AUTOPHAGY	SPTLC2	ENSG00000100596
1591	C5	GO:BP	GOBP_REGULATION_OF_AUTOPHAGY	SREBF1	ENSG00000072310
1592	C5	GO:BP	GOBP_REGULATION_OF_AUTOPHAGY	SREBF2	ENSG00000198911
1593	C5	GO:BP	GOBP_REGULATION_OF_AUTOPHAGY	STAT3	ENSG00000168610
1594	C5	GO:BP	GOBP_REGULATION_OF_AUTOPHAGY	STING1	ENSG00000184584
1595	C5	GO:BP	GOBP_REGULATION_OF_AUTOPHAGY	STING1	ENSG00000288243
1596	C5	GO:BP	GOBP_REGULATION_OF_AUTOPHAGY	STK11	ENSG00000118046
1597	C5	GO:BP	GOBP_REGULATION_OF_AUTOPHAGY	SUPT5H	ENSG00000196235
1598	C5	GO:BP	GOBP_REGULATION_OF_AUTOPHAGY	SVIP	ENSG00000198168
1599	C5	GO:BP	GOBP_REGULATION_OF_AUTOPHAGY	TAB2	ENSG00000055208
1600	C5	GO:BP	GOBP_REGULATION_OF_AUTOPHAGY	TAB3	ENSG00000157625
1601	C5	GO:BP	GOBP_REGULATION_OF_AUTOPHAGY	TBC1D14	ENSG00000132405
1602	C5	GO:BP	GOBP_REGULATION_OF_AUTOPHAGY	TBC1D25	ENSG00000068354
1603	C5	GO:BP	GOBP_REGULATION_OF_AUTOPHAGY	TBK1	ENSG00000183735
1604	C5	GO:BP	GOBP_REGULATION_OF_AUTOPHAGY	TECPR1	ENSG00000205356
1605	C5	GO:BP	GOBP_REGULATION_OF_AUTOPHAGY	TFEB	ENSG00000112561
1606	C5	GO:BP	GOBP_REGULATION_OF_AUTOPHAGY	TICAM1	ENSG00000127666
1607	C5	GO:BP	GOBP_REGULATION_OF_AUTOPHAGY	TIGAR	ENSG00000078237
1608	C5	GO:BP	GOBP_REGULATION_OF_AUTOPHAGY	TLK2	ENSG00000146872
1609	C5	GO:BP	GOBP_REGULATION_OF_AUTOPHAGY	TMEM39A	ENSG00000176142
1610	C5	GO:BP	GOBP_REGULATION_OF_AUTOPHAGY	TMEM59	ENSG00000116209
1611	C5	GO:BP	GOBP_REGULATION_OF_AUTOPHAGY	TP53	ENSG00000141510
1524	C5	GO:BP	GOBP_REGULATION_OF_AUTOPHAGY	PRKAA2	ENSG00000162409
1613	C5	GO:BP	GOBP_REGULATION_OF_AUTOPHAGY	TP53INP2	ENSG00000078804
1614	C5	GO:BP	GOBP_REGULATION_OF_AUTOPHAGY	TPCN1	ENSG00000186815
1615	C5	GO:BP	GOBP_REGULATION_OF_AUTOPHAGY	TPCN2	ENSG00000162341
1616	C5	GO:BP	GOBP_REGULATION_OF_AUTOPHAGY	TREM2	ENSG00000095970
1617	C5	GO:BP	GOBP_REGULATION_OF_AUTOPHAGY	TRIB3	ENSG00000101255
1618	C5	GO:BP	GOBP_REGULATION_OF_AUTOPHAGY	TRIM13	ENSG00000204977
1619	C5	GO:BP	GOBP_REGULATION_OF_AUTOPHAGY	TRIM14	ENSG00000106785
1620	C5	GO:BP	GOBP_REGULATION_OF_AUTOPHAGY	TRIM21	ENSG00000132109
1621	C5	GO:BP	GOBP_REGULATION_OF_AUTOPHAGY	TRIM22	ENSG00000132274
1622	C5	GO:BP	GOBP_REGULATION_OF_AUTOPHAGY	TRIM27	ENSG00000204713
1623	C5	GO:BP	GOBP_REGULATION_OF_AUTOPHAGY	TRIM27	ENSG00000215641
1624	C5	GO:BP	GOBP_REGULATION_OF_AUTOPHAGY	TRIM27	ENSG00000229006
1625	C5	GO:BP	GOBP_REGULATION_OF_AUTOPHAGY	TRIM27	ENSG00000233948
1626	C5	GO:BP	GOBP_REGULATION_OF_AUTOPHAGY	TRIM27	ENSG00000234495
1627	C5	GO:BP	GOBP_REGULATION_OF_AUTOPHAGY	TRIM27	ENSG00000237071
1628	C5	GO:BP	GOBP_REGULATION_OF_AUTOPHAGY	TRIM27	ENSG00000237462
1629	C5	GO:BP	GOBP_REGULATION_OF_AUTOPHAGY	TRIM32	ENSG00000119401
1630	C5	GO:BP	GOBP_REGULATION_OF_AUTOPHAGY	TRIM34	ENSG00000258659
1631	C5	GO:BP	GOBP_REGULATION_OF_AUTOPHAGY	TRIM38	ENSG00000112343
1632	C5	GO:BP	GOBP_REGULATION_OF_AUTOPHAGY	TRIM5	ENSG00000132256
1633	C5	GO:BP	GOBP_REGULATION_OF_AUTOPHAGY	TRIM6	ENSG00000121236
1634	C5	GO:BP	GOBP_REGULATION_OF_AUTOPHAGY	TRIM65	ENSG00000141569
1635	C5	GO:BP	GOBP_REGULATION_OF_AUTOPHAGY	TRIM68	ENSG00000167333
1636	C5	GO:BP	GOBP_REGULATION_OF_AUTOPHAGY	TRIM8	ENSG00000171206
1637	C5	GO:BP	GOBP_REGULATION_OF_AUTOPHAGY	TRIML1	ENSG00000184108
1638	C5	GO:BP	GOBP_REGULATION_OF_AUTOPHAGY	TRIML2	ENSG00000179046
1639	C5	GO:BP	GOBP_REGULATION_OF_AUTOPHAGY	TSC1	ENSG00000165699
1640	C5	GO:BP	GOBP_REGULATION_OF_AUTOPHAGY	TSC2	ENSG00000103197
1641	C5	GO:BP	GOBP_REGULATION_OF_AUTOPHAGY	TSPO	ENSG00000100300
1642	C5	GO:BP	GOBP_REGULATION_OF_AUTOPHAGY	UBQLN1	ENSG00000135018
1643	C5	GO:BP	GOBP_REGULATION_OF_AUTOPHAGY	UBQLN2	ENSG00000188021
1644	C5	GO:BP	GOBP_REGULATION_OF_AUTOPHAGY	UBQLN4	ENSG00000160803
1645	C5	GO:BP	GOBP_REGULATION_OF_AUTOPHAGY	UCHL1	ENSG00000154277
1646	C5	GO:BP	GOBP_REGULATION_OF_AUTOPHAGY	UFL1	ENSG00000014123
1647	C5	GO:BP	GOBP_REGULATION_OF_AUTOPHAGY	ULK1	ENSG00000177169
1648	C5	GO:BP	GOBP_REGULATION_OF_AUTOPHAGY	ULK2	ENSG00000083290
1649	C5	GO:BP	GOBP_REGULATION_OF_AUTOPHAGY	USP10	ENSG00000103194
1650	C5	GO:BP	GOBP_REGULATION_OF_AUTOPHAGY	USP13	ENSG00000058056
1651	C5	GO:BP	GOBP_REGULATION_OF_AUTOPHAGY	USP30	ENSG00000135093
1652	C5	GO:BP	GOBP_REGULATION_OF_AUTOPHAGY	USP33	ENSG00000077254
1653	C5	GO:BP	GOBP_REGULATION_OF_AUTOPHAGY	USP36	ENSG00000055483
1654	C5	GO:BP	GOBP_REGULATION_OF_AUTOPHAGY	UVRAG	ENSG00000198382
1655	C5	GO:BP	GOBP_REGULATION_OF_AUTOPHAGY	VDAC1	ENSG00000213585
1656	C5	GO:BP	GOBP_REGULATION_OF_AUTOPHAGY	VPS13C	ENSG00000129003
1657	C5	GO:BP	GOBP_REGULATION_OF_AUTOPHAGY	VPS13D	ENSG00000048707
1658	C5	GO:BP	GOBP_REGULATION_OF_AUTOPHAGY	VPS26A	ENSG00000122958
1659	C5	GO:BP	GOBP_REGULATION_OF_AUTOPHAGY	VPS26B	ENSG00000151502
1660	C5	GO:BP	GOBP_REGULATION_OF_AUTOPHAGY	VPS29	ENSG00000111237
1661	C5	GO:BP	GOBP_REGULATION_OF_AUTOPHAGY	VPS35	ENSG00000069329
1662	C5	GO:BP	GOBP_REGULATION_OF_AUTOPHAGY	WAC	ENSG00000095787
1663	C5	GO:BP	GOBP_REGULATION_OF_AUTOPHAGY	WASHC1	ENSG00000181404
1664	C5	GO:BP	GOBP_REGULATION_OF_AUTOPHAGY	WDR24	ENSG00000127580
1665	C5	GO:BP	GOBP_REGULATION_OF_AUTOPHAGY	WDR41	ENSG00000164253
1666	C5	GO:BP	GOBP_REGULATION_OF_AUTOPHAGY	WDR45	ENSG00000188378
1667	C5	GO:BP	GOBP_REGULATION_OF_AUTOPHAGY	WDR45	ENSG00000196998
1668	C5	GO:BP	GOBP_REGULATION_OF_AUTOPHAGY	WDR6	ENSG00000178252
1669	C5	GO:BP	GOBP_REGULATION_OF_AUTOPHAGY	WIPI1	ENSG00000070540
1670	C5	GO:BP	GOBP_REGULATION_OF_AUTOPHAGY	ZC3H12A	ENSG00000163874
1671	C5	GO:BP	GOBP_REGULATION_OF_AUTOPHAGY	ZKSCAN3	ENSG00000189298
1672	C5	GO:BP	GOBP_REGULATION_OF_AUTOPHAGY	ZMPSTE24	ENSG00000084073
1673	C5	GO:BP	GOBP_REGULATION_OF_AUTOPHAGY_OF_MITOCHONDRION	AMBRA1	ENSG00000110497
1674	C5	GO:BP	GOBP_REGULATION_OF_AUTOPHAGY_OF_MITOCHONDRION	ATP13A2	ENSG00000159363
1675	C5	GO:BP	GOBP_REGULATION_OF_AUTOPHAGY_OF_MITOCHONDRION	BNIP3	ENSG00000176171
1676	C5	GO:BP	GOBP_REGULATION_OF_AUTOPHAGY_OF_MITOCHONDRION	BNIP3L	ENSG00000104765
1677	C5	GO:BP	GOBP_REGULATION_OF_AUTOPHAGY_OF_MITOCHONDRION	CAMKK2	ENSG00000110931
1678	C5	GO:BP	GOBP_REGULATION_OF_AUTOPHAGY_OF_MITOCHONDRION	CERS1	ENSG00000223802
1679	C5	GO:BP	GOBP_REGULATION_OF_AUTOPHAGY_OF_MITOCHONDRION	CSNK2A2	ENSG00000070770
1680	C5	GO:BP	GOBP_REGULATION_OF_AUTOPHAGY_OF_MITOCHONDRION	CTTN	ENSG00000085733
1681	C5	GO:BP	GOBP_REGULATION_OF_AUTOPHAGY_OF_MITOCHONDRION	CTTN	ENSG00000288401
1682	C5	GO:BP	GOBP_REGULATION_OF_AUTOPHAGY_OF_MITOCHONDRION	DNM1L	ENSG00000087470
1683	C5	GO:BP	GOBP_REGULATION_OF_AUTOPHAGY_OF_MITOCHONDRION	FBXO7	ENSG00000100225
1684	C5	GO:BP	GOBP_REGULATION_OF_AUTOPHAGY_OF_MITOCHONDRION	FBXW7	ENSG00000109670
1685	C5	GO:BP	GOBP_REGULATION_OF_AUTOPHAGY_OF_MITOCHONDRION	FZD5	ENSG00000163251
1686	C5	GO:BP	GOBP_REGULATION_OF_AUTOPHAGY_OF_MITOCHONDRION	GSK3A	ENSG00000105723
1687	C5	GO:BP	GOBP_REGULATION_OF_AUTOPHAGY_OF_MITOCHONDRION	HAX1	ENSG00000143575
1688	C5	GO:BP	GOBP_REGULATION_OF_AUTOPHAGY_OF_MITOCHONDRION	HDAC6	ENSG00000094631
1689	C5	GO:BP	GOBP_REGULATION_OF_AUTOPHAGY_OF_MITOCHONDRION	HIF1A	ENSG00000100644
1690	C5	GO:BP	GOBP_REGULATION_OF_AUTOPHAGY_OF_MITOCHONDRION	HTRA2	ENSG00000115317
1691	C5	GO:BP	GOBP_REGULATION_OF_AUTOPHAGY_OF_MITOCHONDRION	HTT	ENSG00000197386
1692	C5	GO:BP	GOBP_REGULATION_OF_AUTOPHAGY_OF_MITOCHONDRION	PARK7	ENSG00000116288
1693	C5	GO:BP	GOBP_REGULATION_OF_AUTOPHAGY_OF_MITOCHONDRION	PARL	ENSG00000175193
1694	C5	GO:BP	GOBP_REGULATION_OF_AUTOPHAGY_OF_MITOCHONDRION	PINK1	ENSG00000158828
1695	C5	GO:BP	GOBP_REGULATION_OF_AUTOPHAGY_OF_MITOCHONDRION	PRKN	ENSG00000185345
1696	C5	GO:BP	GOBP_REGULATION_OF_AUTOPHAGY_OF_MITOCHONDRION	RNF41	ENSG00000181852
1697	C5	GO:BP	GOBP_REGULATION_OF_AUTOPHAGY_OF_MITOCHONDRION	SLC25A4	ENSG00000151729
1698	C5	GO:BP	GOBP_REGULATION_OF_AUTOPHAGY_OF_MITOCHONDRION	SLC25A5	ENSG00000005022
1699	C5	GO:BP	GOBP_REGULATION_OF_AUTOPHAGY_OF_MITOCHONDRION	SREBF1	ENSG00000072310
1700	C5	GO:BP	GOBP_REGULATION_OF_AUTOPHAGY_OF_MITOCHONDRION	SREBF2	ENSG00000198911
1701	C5	GO:BP	GOBP_REGULATION_OF_AUTOPHAGY_OF_MITOCHONDRION	TIGAR	ENSG00000078237
1702	C5	GO:BP	GOBP_REGULATION_OF_AUTOPHAGY_OF_MITOCHONDRION	TP53	ENSG00000141510
1703	C5	GO:BP	GOBP_REGULATION_OF_AUTOPHAGY_OF_MITOCHONDRION	TSC2	ENSG00000103197
1704	C5	GO:BP	GOBP_REGULATION_OF_AUTOPHAGY_OF_MITOCHONDRION	TSPO	ENSG00000100300
1705	C5	GO:BP	GOBP_REGULATION_OF_AUTOPHAGY_OF_MITOCHONDRION	USP30	ENSG00000135093
1706	C5	GO:BP	GOBP_REGULATION_OF_AUTOPHAGY_OF_MITOCHONDRION	USP36	ENSG00000055483
1707	C5	GO:BP	GOBP_REGULATION_OF_AUTOPHAGY_OF_MITOCHONDRION	VDAC1	ENSG00000213585
1708	C5	GO:BP	GOBP_REGULATION_OF_AUTOPHAGY_OF_MITOCHONDRION	VPS13C	ENSG00000129003
1709	C5	GO:BP	GOBP_REGULATION_OF_AUTOPHAGY_OF_MITOCHONDRION	VPS13D	ENSG00000048707
1710	C5	GO:BP	GOBP_REGULATION_OF_AUTOPHAGY_OF_MITOCHONDRION_IN_RESPONSE_TO_MITOCHONDRIAL_DEPOLARIZATION	ATP5IF1	ENSG00000130770
1711	C5	GO:BP	GOBP_REGULATION_OF_AUTOPHAGY_OF_MITOCHONDRION_IN_RESPONSE_TO_MITOCHONDRIAL_DEPOLARIZATION	ATP5IF1	ENSG00000285390
1712	C5	GO:BP	GOBP_REGULATION_OF_AUTOPHAGY_OF_MITOCHONDRION_IN_RESPONSE_TO_MITOCHONDRIAL_DEPOLARIZATION	CDC37	ENSG00000105401
1713	C5	GO:BP	GOBP_REGULATION_OF_AUTOPHAGY_OF_MITOCHONDRION_IN_RESPONSE_TO_MITOCHONDRIAL_DEPOLARIZATION	GBA	ENSG00000177628
1714	C5	GO:BP	GOBP_REGULATION_OF_AUTOPHAGY_OF_MITOCHONDRION_IN_RESPONSE_TO_MITOCHONDRIAL_DEPOLARIZATION	GBA	ENSG00000262446
1715	C5	GO:BP	GOBP_REGULATION_OF_AUTOPHAGY_OF_MITOCHONDRION_IN_RESPONSE_TO_MITOCHONDRIAL_DEPOLARIZATION	HDAC6	ENSG00000094631
1716	C5	GO:BP	GOBP_REGULATION_OF_AUTOPHAGY_OF_MITOCHONDRION_IN_RESPONSE_TO_MITOCHONDRIAL_DEPOLARIZATION	HK2	ENSG00000159399
1717	C5	GO:BP	GOBP_REGULATION_OF_AUTOPHAGY_OF_MITOCHONDRION_IN_RESPONSE_TO_MITOCHONDRIAL_DEPOLARIZATION	HTRA2	ENSG00000115317
1718	C5	GO:BP	GOBP_REGULATION_OF_AUTOPHAGY_OF_MITOCHONDRION_IN_RESPONSE_TO_MITOCHONDRIAL_DEPOLARIZATION	HUWE1	ENSG00000086758
1719	C5	GO:BP	GOBP_REGULATION_OF_AUTOPHAGY_OF_MITOCHONDRION_IN_RESPONSE_TO_MITOCHONDRIAL_DEPOLARIZATION	MFN2	ENSG00000116688
1720	C5	GO:BP	GOBP_REGULATION_OF_AUTOPHAGY_OF_MITOCHONDRION_IN_RESPONSE_TO_MITOCHONDRIAL_DEPOLARIZATION	MUL1	ENSG00000090432
1721	C5	GO:BP	GOBP_REGULATION_OF_AUTOPHAGY_OF_MITOCHONDRION_IN_RESPONSE_TO_MITOCHONDRIAL_DEPOLARIZATION	OPTN	ENSG00000123240
1722	C5	GO:BP	GOBP_REGULATION_OF_AUTOPHAGY_OF_MITOCHONDRION_IN_RESPONSE_TO_MITOCHONDRIAL_DEPOLARIZATION	PINK1	ENSG00000158828
1723	C5	GO:BP	GOBP_REGULATION_OF_AUTOPHAGY_OF_MITOCHONDRION_IN_RESPONSE_TO_MITOCHONDRIAL_DEPOLARIZATION	PRKN	ENSG00000185345
1724	C5	GO:BP	GOBP_REGULATION_OF_AUTOPHAGY_OF_MITOCHONDRION_IN_RESPONSE_TO_MITOCHONDRIAL_DEPOLARIZATION	TOMM7	ENSG00000196683
1725	C5	GO:BP	GOBP_REGULATION_OF_AUTOPHAGY_OF_MITOCHONDRION_IN_RESPONSE_TO_MITOCHONDRIAL_DEPOLARIZATION	VPS13C	ENSG00000129003
1726	C5	GO:BP	GOBP_REGULATION_OF_CHAPERONE_MEDIATED_AUTOPHAGY	ATP13A2	ENSG00000159363
1727	C5	GO:BP	GOBP_REGULATION_OF_CHAPERONE_MEDIATED_AUTOPHAGY	CTSA	ENSG00000064601
1728	C5	GO:BP	GOBP_REGULATION_OF_CHAPERONE_MEDIATED_AUTOPHAGY	EEF1A1	ENSG00000156508
1854	C5	GO:BP	GOBP_REGULATION_OF_MACROAUTOPHAGY	PRKAA2	ENSG00000162409
1730	C5	GO:BP	GOBP_REGULATION_OF_CHAPERONE_MEDIATED_AUTOPHAGY	GFAP	ENSG00000131095
1731	C5	GO:BP	GOBP_REGULATION_OF_CHAPERONE_MEDIATED_AUTOPHAGY	PLK3	ENSG00000173846
1732	C5	GO:BP	GOBP_REGULATION_OF_CHAPERONE_MEDIATED_AUTOPHAGY	SNCA	ENSG00000145335
1733	C5	GO:BP	GOBP_REGULATION_OF_CHAPERONE_MEDIATED_AUTOPHAGY	SNRNP70	ENSG00000104852
1734	C5	GO:BP	GOBP_REGULATION_OF_LIPOPHAGY	ADRB2	ENSG00000169252
1735	C5	GO:BP	GOBP_REGULATION_OF_LIPOPHAGY	HTT	ENSG00000197386
1736	C5	GO:BP	GOBP_REGULATION_OF_LIPOPHAGY	SESN2	ENSG00000130766
1737	C5	GO:BP	GOBP_REGULATION_OF_LIPOPHAGY	SESN2	ENSG00000285069
1738	C5	GO:BP	GOBP_REGULATION_OF_LIPOPHAGY	SPTLC1	ENSG00000090054
1739	C5	GO:BP	GOBP_REGULATION_OF_LIPOPHAGY	SPTLC2	ENSG00000100596
1740	C5	GO:BP	GOBP_REGULATION_OF_MACROAUTOPHAGY	ADRB2	ENSG00000169252
1741	C5	GO:BP	GOBP_REGULATION_OF_MACROAUTOPHAGY	AKT1	ENSG00000142208
1742	C5	GO:BP	GOBP_REGULATION_OF_MACROAUTOPHAGY	AMBRA1	ENSG00000110497
1743	C5	GO:BP	GOBP_REGULATION_OF_MACROAUTOPHAGY	ATG12	ENSG00000145782
1744	C5	GO:BP	GOBP_REGULATION_OF_MACROAUTOPHAGY	ATG14	ENSG00000126775
1745	C5	GO:BP	GOBP_REGULATION_OF_MACROAUTOPHAGY	ATG2A	ENSG00000110046
1746	C5	GO:BP	GOBP_REGULATION_OF_MACROAUTOPHAGY	ATG5	ENSG00000057663
1747	C5	GO:BP	GOBP_REGULATION_OF_MACROAUTOPHAGY	ATP13A2	ENSG00000159363
1748	C5	GO:BP	GOBP_REGULATION_OF_MACROAUTOPHAGY	ATP6V0A1	ENSG00000033627
1749	C5	GO:BP	GOBP_REGULATION_OF_MACROAUTOPHAGY	ATP6V0A2	ENSG00000185344
1750	C5	GO:BP	GOBP_REGULATION_OF_MACROAUTOPHAGY	ATP6V0B	ENSG00000117410
1751	C5	GO:BP	GOBP_REGULATION_OF_MACROAUTOPHAGY	ATP6V0C	ENSG00000185883
1752	C5	GO:BP	GOBP_REGULATION_OF_MACROAUTOPHAGY	ATP6V0D1	ENSG00000159720
1753	C5	GO:BP	GOBP_REGULATION_OF_MACROAUTOPHAGY	ATP6V0D2	ENSG00000147614
1754	C5	GO:BP	GOBP_REGULATION_OF_MACROAUTOPHAGY	ATP6V0E1	ENSG00000113732
1755	C5	GO:BP	GOBP_REGULATION_OF_MACROAUTOPHAGY	ATP6V0E2	ENSG00000171130
1756	C5	GO:BP	GOBP_REGULATION_OF_MACROAUTOPHAGY	ATP6V1A	ENSG00000114573
1757	C5	GO:BP	GOBP_REGULATION_OF_MACROAUTOPHAGY	ATP6V1B1	ENSG00000116039
1758	C5	GO:BP	GOBP_REGULATION_OF_MACROAUTOPHAGY	ATP6V1B2	ENSG00000147416
1759	C5	GO:BP	GOBP_REGULATION_OF_MACROAUTOPHAGY	ATP6V1C1	ENSG00000155097
1760	C5	GO:BP	GOBP_REGULATION_OF_MACROAUTOPHAGY	ATP6V1C2	ENSG00000143882
1761	C5	GO:BP	GOBP_REGULATION_OF_MACROAUTOPHAGY	ATP6V1D	ENSG00000100554
1762	C5	GO:BP	GOBP_REGULATION_OF_MACROAUTOPHAGY	ATP6V1E1	ENSG00000131100
1763	C5	GO:BP	GOBP_REGULATION_OF_MACROAUTOPHAGY	ATP6V1E2	ENSG00000250565
1764	C5	GO:BP	GOBP_REGULATION_OF_MACROAUTOPHAGY	ATP6V1G1	ENSG00000136888
1765	C5	GO:BP	GOBP_REGULATION_OF_MACROAUTOPHAGY	ATP6V1G2	ENSG00000206334
1766	C5	GO:BP	GOBP_REGULATION_OF_MACROAUTOPHAGY	ATP6V1G2	ENSG00000206445
1767	C5	GO:BP	GOBP_REGULATION_OF_MACROAUTOPHAGY	ATP6V1G2	ENSG00000213760
1768	C5	GO:BP	GOBP_REGULATION_OF_MACROAUTOPHAGY	ATP6V1G2	ENSG00000226850
1769	C5	GO:BP	GOBP_REGULATION_OF_MACROAUTOPHAGY	ATP6V1G2	ENSG00000227587
1770	C5	GO:BP	GOBP_REGULATION_OF_MACROAUTOPHAGY	ATP6V1G2	ENSG00000230900
1771	C5	GO:BP	GOBP_REGULATION_OF_MACROAUTOPHAGY	ATP6V1G2	ENSG00000234668
1772	C5	GO:BP	GOBP_REGULATION_OF_MACROAUTOPHAGY	ATP6V1G2	ENSG00000234920
1773	C5	GO:BP	GOBP_REGULATION_OF_MACROAUTOPHAGY	ATP6V1H	ENSG00000047249
1774	C5	GO:BP	GOBP_REGULATION_OF_MACROAUTOPHAGY	BAG3	ENSG00000151929
1775	C5	GO:BP	GOBP_REGULATION_OF_MACROAUTOPHAGY	BECN1	ENSG00000126581
1776	C5	GO:BP	GOBP_REGULATION_OF_MACROAUTOPHAGY	BNIP3	ENSG00000176171
1777	C5	GO:BP	GOBP_REGULATION_OF_MACROAUTOPHAGY	BNIP3L	ENSG00000104765
1778	C5	GO:BP	GOBP_REGULATION_OF_MACROAUTOPHAGY	C9orf72	ENSG00000147894
1779	C5	GO:BP	GOBP_REGULATION_OF_MACROAUTOPHAGY	CALCOCO2	ENSG00000136436
1780	C5	GO:BP	GOBP_REGULATION_OF_MACROAUTOPHAGY	CAPN1	ENSG00000014216
1781	C5	GO:BP	GOBP_REGULATION_OF_MACROAUTOPHAGY	CAPNS1	ENSG00000126247
1782	C5	GO:BP	GOBP_REGULATION_OF_MACROAUTOPHAGY	CASP3	ENSG00000164305
1783	C5	GO:BP	GOBP_REGULATION_OF_MACROAUTOPHAGY	CDK5	ENSG00000164885
1784	C5	GO:BP	GOBP_REGULATION_OF_MACROAUTOPHAGY	CDK5R1	ENSG00000176749
1785	C5	GO:BP	GOBP_REGULATION_OF_MACROAUTOPHAGY	CERS1	ENSG00000223802
1786	C5	GO:BP	GOBP_REGULATION_OF_MACROAUTOPHAGY	CHMP4A	ENSG00000254505
1787	C5	GO:BP	GOBP_REGULATION_OF_MACROAUTOPHAGY	CHMP4A	ENSG00000285302
1788	C5	GO:BP	GOBP_REGULATION_OF_MACROAUTOPHAGY	CHMP4B	ENSG00000101421
1789	C5	GO:BP	GOBP_REGULATION_OF_MACROAUTOPHAGY	CLEC16A	ENSG00000038532
1790	C5	GO:BP	GOBP_REGULATION_OF_MACROAUTOPHAGY	CLN3	ENSG00000188603
1791	C5	GO:BP	GOBP_REGULATION_OF_MACROAUTOPHAGY	DCN	ENSG00000011465
1792	C5	GO:BP	GOBP_REGULATION_OF_MACROAUTOPHAGY	EHMT2	ENSG00000204371
1793	C5	GO:BP	GOBP_REGULATION_OF_MACROAUTOPHAGY	EHMT2	ENSG00000206376
1794	C5	GO:BP	GOBP_REGULATION_OF_MACROAUTOPHAGY	EHMT2	ENSG00000224143
1795	C5	GO:BP	GOBP_REGULATION_OF_MACROAUTOPHAGY	EHMT2	ENSG00000227333
1796	C5	GO:BP	GOBP_REGULATION_OF_MACROAUTOPHAGY	EHMT2	ENSG00000232045
1797	C5	GO:BP	GOBP_REGULATION_OF_MACROAUTOPHAGY	EHMT2	ENSG00000236759
1798	C5	GO:BP	GOBP_REGULATION_OF_MACROAUTOPHAGY	EHMT2	ENSG00000238134
1799	C5	GO:BP	GOBP_REGULATION_OF_MACROAUTOPHAGY	ELAPOR1	ENSG00000116299
1800	C5	GO:BP	GOBP_REGULATION_OF_MACROAUTOPHAGY	EPM2A	ENSG00000112425
1801	C5	GO:BP	GOBP_REGULATION_OF_MACROAUTOPHAGY	ERN1	ENSG00000178607
1802	C5	GO:BP	GOBP_REGULATION_OF_MACROAUTOPHAGY	EXOC1	ENSG00000090989
1803	C5	GO:BP	GOBP_REGULATION_OF_MACROAUTOPHAGY	EXOC4	ENSG00000131558
1804	C5	GO:BP	GOBP_REGULATION_OF_MACROAUTOPHAGY	EXOC7	ENSG00000182473
1805	C5	GO:BP	GOBP_REGULATION_OF_MACROAUTOPHAGY	EXOC8	ENSG00000116903
1806	C5	GO:BP	GOBP_REGULATION_OF_MACROAUTOPHAGY	FEZ1	ENSG00000149557
1807	C5	GO:BP	GOBP_REGULATION_OF_MACROAUTOPHAGY	FEZ2	ENSG00000171055
1808	C5	GO:BP	GOBP_REGULATION_OF_MACROAUTOPHAGY	FYCO1	ENSG00000163820
1809	C5	GO:BP	GOBP_REGULATION_OF_MACROAUTOPHAGY	GAPDH	ENSG00000111640
1810	C5	GO:BP	GOBP_REGULATION_OF_MACROAUTOPHAGY	GBA	ENSG00000177628
1811	C5	GO:BP	GOBP_REGULATION_OF_MACROAUTOPHAGY	GBA	ENSG00000262446
1812	C5	GO:BP	GOBP_REGULATION_OF_MACROAUTOPHAGY	GNAI3	ENSG00000065135
1813	C5	GO:BP	GOBP_REGULATION_OF_MACROAUTOPHAGY	GPSM1	ENSG00000160360
1814	C5	GO:BP	GOBP_REGULATION_OF_MACROAUTOPHAGY	HDAC6	ENSG00000094631
1815	C5	GO:BP	GOBP_REGULATION_OF_MACROAUTOPHAGY	HIF1A	ENSG00000100644
1816	C5	GO:BP	GOBP_REGULATION_OF_MACROAUTOPHAGY	HMOX1	ENSG00000100292
1817	C5	GO:BP	GOBP_REGULATION_OF_MACROAUTOPHAGY	HSPB8	ENSG00000152137
1818	C5	GO:BP	GOBP_REGULATION_OF_MACROAUTOPHAGY	HTT	ENSG00000197386
1819	C5	GO:BP	GOBP_REGULATION_OF_MACROAUTOPHAGY	IKBKG	ENSG00000269335
1820	C5	GO:BP	GOBP_REGULATION_OF_MACROAUTOPHAGY	IL4	ENSG00000113520
1821	C5	GO:BP	GOBP_REGULATION_OF_MACROAUTOPHAGY	IRGM	ENSG00000237693
1822	C5	GO:BP	GOBP_REGULATION_OF_MACROAUTOPHAGY	KDR	ENSG00000128052
1823	C5	GO:BP	GOBP_REGULATION_OF_MACROAUTOPHAGY	LACRT	ENSG00000135413
1824	C5	GO:BP	GOBP_REGULATION_OF_MACROAUTOPHAGY	LARP1	ENSG00000155506
1825	C5	GO:BP	GOBP_REGULATION_OF_MACROAUTOPHAGY	LRRK2	ENSG00000188906
1826	C5	GO:BP	GOBP_REGULATION_OF_MACROAUTOPHAGY	LRSAM1	ENSG00000148356
1827	C5	GO:BP	GOBP_REGULATION_OF_MACROAUTOPHAGY	LZTS1	ENSG00000061337
1828	C5	GO:BP	GOBP_REGULATION_OF_MACROAUTOPHAGY	MAP3K7	ENSG00000135341
1829	C5	GO:BP	GOBP_REGULATION_OF_MACROAUTOPHAGY	MAPK3	ENSG00000102882
1830	C5	GO:BP	GOBP_REGULATION_OF_MACROAUTOPHAGY	MAPK8	ENSG00000107643
1831	C5	GO:BP	GOBP_REGULATION_OF_MACROAUTOPHAGY	MOAP1	ENSG00000165943
1832	C5	GO:BP	GOBP_REGULATION_OF_MACROAUTOPHAGY	MOAP1	ENSG00000278268
1833	C5	GO:BP	GOBP_REGULATION_OF_MACROAUTOPHAGY	MTM1	ENSG00000171100
1834	C5	GO:BP	GOBP_REGULATION_OF_MACROAUTOPHAGY	MTMR8	ENSG00000102043
1835	C5	GO:BP	GOBP_REGULATION_OF_MACROAUTOPHAGY	MTOR	ENSG00000198793
1836	C5	GO:BP	GOBP_REGULATION_OF_MACROAUTOPHAGY	NEDD4	ENSG00000069869
1837	C5	GO:BP	GOBP_REGULATION_OF_MACROAUTOPHAGY	NOD1	ENSG00000106100
1838	C5	GO:BP	GOBP_REGULATION_OF_MACROAUTOPHAGY	NOD2	ENSG00000167207
1839	C5	GO:BP	GOBP_REGULATION_OF_MACROAUTOPHAGY	NPC1	ENSG00000141458
1840	C5	GO:BP	GOBP_REGULATION_OF_MACROAUTOPHAGY	NRBP2	ENSG00000185189
2284	C2	CP:KEGG	KEGG_REGULATION_OF_AUTOPHAGY	PRKAA2	ENSG00000162409
1842	C5	GO:BP	GOBP_REGULATION_OF_MACROAUTOPHAGY	OPTN	ENSG00000123240
1843	C5	GO:BP	GOBP_REGULATION_OF_MACROAUTOPHAGY	PAFAH1B2	ENSG00000168092
1844	C5	GO:BP	GOBP_REGULATION_OF_MACROAUTOPHAGY	PHF23	ENSG00000040633
1845	C5	GO:BP	GOBP_REGULATION_OF_MACROAUTOPHAGY	PIK3C3	ENSG00000078142
1846	C5	GO:BP	GOBP_REGULATION_OF_MACROAUTOPHAGY	PIK3CA	ENSG00000121879
1847	C5	GO:BP	GOBP_REGULATION_OF_MACROAUTOPHAGY	PIK3R4	ENSG00000196455
1848	C5	GO:BP	GOBP_REGULATION_OF_MACROAUTOPHAGY	PINK1	ENSG00000158828
1849	C5	GO:BP	GOBP_REGULATION_OF_MACROAUTOPHAGY	PIP4K2A	ENSG00000150867
1850	C5	GO:BP	GOBP_REGULATION_OF_MACROAUTOPHAGY	PIP4K2B	ENSG00000276293
1851	C5	GO:BP	GOBP_REGULATION_OF_MACROAUTOPHAGY	PIP4K2B	ENSG00000277292
1852	C5	GO:BP	GOBP_REGULATION_OF_MACROAUTOPHAGY	PIP4K2C	ENSG00000166908
1853	C5	GO:BP	GOBP_REGULATION_OF_MACROAUTOPHAGY	POLDIP2	ENSG00000004142
2521	C2	CP:REACTOME	REACTOME_AUTOPHAGY	PRKAA2	ENSG00000162409
1855	C5	GO:BP	GOBP_REGULATION_OF_MACROAUTOPHAGY	PRKACA	ENSG00000072062
1856	C5	GO:BP	GOBP_REGULATION_OF_MACROAUTOPHAGY	PRKACA	ENSG00000288516
1857	C5	GO:BP	GOBP_REGULATION_OF_MACROAUTOPHAGY	QSOX1	ENSG00000116260
1858	C5	GO:BP	GOBP_REGULATION_OF_MACROAUTOPHAGY	RAB3GAP1	ENSG00000115839
1859	C5	GO:BP	GOBP_REGULATION_OF_MACROAUTOPHAGY	RAB3GAP2	ENSG00000118873
1860	C5	GO:BP	GOBP_REGULATION_OF_MACROAUTOPHAGY	RALB	ENSG00000144118
1861	C5	GO:BP	GOBP_REGULATION_OF_MACROAUTOPHAGY	RHEB	ENSG00000106615
1862	C5	GO:BP	GOBP_REGULATION_OF_MACROAUTOPHAGY	RIPK2	ENSG00000104312
1863	C5	GO:BP	GOBP_REGULATION_OF_MACROAUTOPHAGY	RNF31	ENSG00000092098
1864	C5	GO:BP	GOBP_REGULATION_OF_MACROAUTOPHAGY	RNF31	ENSG00000285152
1865	C5	GO:BP	GOBP_REGULATION_OF_MACROAUTOPHAGY	RNF41	ENSG00000181852
1866	C5	GO:BP	GOBP_REGULATION_OF_MACROAUTOPHAGY	RUBCN	ENSG00000145016
1867	C5	GO:BP	GOBP_REGULATION_OF_MACROAUTOPHAGY	RUFY4	ENSG00000188282
1868	C5	GO:BP	GOBP_REGULATION_OF_MACROAUTOPHAGY	SCFD1	ENSG00000092108
1869	C5	GO:BP	GOBP_REGULATION_OF_MACROAUTOPHAGY	SCOC	ENSG00000153130
1870	C5	GO:BP	GOBP_REGULATION_OF_MACROAUTOPHAGY	SEC22B	ENSG00000265808
1871	C5	GO:BP	GOBP_REGULATION_OF_MACROAUTOPHAGY	SESN1	ENSG00000080546
1872	C5	GO:BP	GOBP_REGULATION_OF_MACROAUTOPHAGY	SESN2	ENSG00000130766
1873	C5	GO:BP	GOBP_REGULATION_OF_MACROAUTOPHAGY	SESN2	ENSG00000285069
1874	C5	GO:BP	GOBP_REGULATION_OF_MACROAUTOPHAGY	SESN3	ENSG00000149212
1875	C5	GO:BP	GOBP_REGULATION_OF_MACROAUTOPHAGY	SH3GLB1	ENSG00000097033
1876	C5	GO:BP	GOBP_REGULATION_OF_MACROAUTOPHAGY	SIRT1	ENSG00000096717
1877	C5	GO:BP	GOBP_REGULATION_OF_MACROAUTOPHAGY	SLC25A4	ENSG00000151729
1878	C5	GO:BP	GOBP_REGULATION_OF_MACROAUTOPHAGY	SLC25A5	ENSG00000005022
1879	C5	GO:BP	GOBP_REGULATION_OF_MACROAUTOPHAGY	SMCR8	ENSG00000176994
1880	C5	GO:BP	GOBP_REGULATION_OF_MACROAUTOPHAGY	SMCR8	ENSG00000283741
1881	C5	GO:BP	GOBP_REGULATION_OF_MACROAUTOPHAGY	SMG1	ENSG00000157106
1882	C5	GO:BP	GOBP_REGULATION_OF_MACROAUTOPHAGY	SNX18	ENSG00000178996
1883	C5	GO:BP	GOBP_REGULATION_OF_MACROAUTOPHAGY	SNX30	ENSG00000148158
1884	C5	GO:BP	GOBP_REGULATION_OF_MACROAUTOPHAGY	SNX32	ENSG00000172803
1885	C5	GO:BP	GOBP_REGULATION_OF_MACROAUTOPHAGY	SNX4	ENSG00000114520
1886	C5	GO:BP	GOBP_REGULATION_OF_MACROAUTOPHAGY	SNX5	ENSG00000089006
1887	C5	GO:BP	GOBP_REGULATION_OF_MACROAUTOPHAGY	SNX6	ENSG00000129515
1888	C5	GO:BP	GOBP_REGULATION_OF_MACROAUTOPHAGY	SNX7	ENSG00000162627
1889	C5	GO:BP	GOBP_REGULATION_OF_MACROAUTOPHAGY	SPTLC1	ENSG00000090054
1890	C5	GO:BP	GOBP_REGULATION_OF_MACROAUTOPHAGY	SPTLC2	ENSG00000100596
1891	C5	GO:BP	GOBP_REGULATION_OF_MACROAUTOPHAGY	STING1	ENSG00000184584
1892	C5	GO:BP	GOBP_REGULATION_OF_MACROAUTOPHAGY	STING1	ENSG00000288243
1893	C5	GO:BP	GOBP_REGULATION_OF_MACROAUTOPHAGY	SUPT5H	ENSG00000196235
1894	C5	GO:BP	GOBP_REGULATION_OF_MACROAUTOPHAGY	TBC1D25	ENSG00000068354
1895	C5	GO:BP	GOBP_REGULATION_OF_MACROAUTOPHAGY	TBK1	ENSG00000183735
1896	C5	GO:BP	GOBP_REGULATION_OF_MACROAUTOPHAGY	TECPR1	ENSG00000205356
1897	C5	GO:BP	GOBP_REGULATION_OF_MACROAUTOPHAGY	TIGAR	ENSG00000078237
1898	C5	GO:BP	GOBP_REGULATION_OF_MACROAUTOPHAGY	TMEM39A	ENSG00000176142
1899	C5	GO:BP	GOBP_REGULATION_OF_MACROAUTOPHAGY	TP53	ENSG00000141510
1900	C5	GO:BP	GOBP_REGULATION_OF_MACROAUTOPHAGY	TRIM13	ENSG00000204977
1901	C5	GO:BP	GOBP_REGULATION_OF_MACROAUTOPHAGY	TSC1	ENSG00000165699
1902	C5	GO:BP	GOBP_REGULATION_OF_MACROAUTOPHAGY	TSC2	ENSG00000103197
1903	C5	GO:BP	GOBP_REGULATION_OF_MACROAUTOPHAGY	UBQLN1	ENSG00000135018
1904	C5	GO:BP	GOBP_REGULATION_OF_MACROAUTOPHAGY	UBQLN2	ENSG00000188021
1905	C5	GO:BP	GOBP_REGULATION_OF_MACROAUTOPHAGY	UBQLN4	ENSG00000160803
1906	C5	GO:BP	GOBP_REGULATION_OF_MACROAUTOPHAGY	UCHL1	ENSG00000154277
1907	C5	GO:BP	GOBP_REGULATION_OF_MACROAUTOPHAGY	ULK1	ENSG00000177169
1908	C5	GO:BP	GOBP_REGULATION_OF_MACROAUTOPHAGY	USP30	ENSG00000135093
1909	C5	GO:BP	GOBP_REGULATION_OF_MACROAUTOPHAGY	USP36	ENSG00000055483
1910	C5	GO:BP	GOBP_REGULATION_OF_MACROAUTOPHAGY	UVRAG	ENSG00000198382
1911	C5	GO:BP	GOBP_REGULATION_OF_MACROAUTOPHAGY	VDAC1	ENSG00000213585
1912	C5	GO:BP	GOBP_REGULATION_OF_MACROAUTOPHAGY	VPS13C	ENSG00000129003
1913	C5	GO:BP	GOBP_REGULATION_OF_MACROAUTOPHAGY	VPS13D	ENSG00000048707
1914	C5	GO:BP	GOBP_REGULATION_OF_MACROAUTOPHAGY	VPS26A	ENSG00000122958
1915	C5	GO:BP	GOBP_REGULATION_OF_MACROAUTOPHAGY	VPS26B	ENSG00000151502
1916	C5	GO:BP	GOBP_REGULATION_OF_MACROAUTOPHAGY	VPS35	ENSG00000069329
1917	C5	GO:BP	GOBP_REGULATION_OF_MACROAUTOPHAGY	WAC	ENSG00000095787
1918	C5	GO:BP	GOBP_REGULATION_OF_MACROAUTOPHAGY	WDR45	ENSG00000188378
1919	C5	GO:BP	GOBP_REGULATION_OF_MACROAUTOPHAGY	WDR45	ENSG00000196998
1920	C5	GO:BP	GOBP_REGULATION_OF_MACROAUTOPHAGY	WIPI1	ENSG00000070540
1921	C5	GO:BP	GOBP_REGULATION_OF_MITOPHAGY	AMBRA1	ENSG00000110497
1922	C5	GO:BP	GOBP_REGULATION_OF_MITOPHAGY	CERS1	ENSG00000223802
1923	C5	GO:BP	GOBP_REGULATION_OF_MITOPHAGY	RNF41	ENSG00000181852
1924	C5	GO:BP	GOBP_REGULATION_OF_MITOPHAGY	SLC25A4	ENSG00000151729
1925	C5	GO:BP	GOBP_REGULATION_OF_MITOPHAGY	SLC25A5	ENSG00000005022
1926	C5	GO:BP	GOBP_REGULATION_OF_MITOPHAGY	TIGAR	ENSG00000078237
1927	C5	GO:BP	GOBP_REGULATION_OF_MITOPHAGY	TP53	ENSG00000141510
1928	C5	GO:BP	GOBP_REGULATION_OF_MITOPHAGY	TSC2	ENSG00000103197
1929	C5	GO:BP	GOBP_REGULATION_OF_MITOPHAGY	USP30	ENSG00000135093
1930	C5	GO:BP	GOBP_REGULATION_OF_MITOPHAGY	VDAC1	ENSG00000213585
1931	C5	GO:BP	GOBP_REGULATION_OF_MITOPHAGY	VPS13C	ENSG00000129003
1932	C5	GO:BP	GOBP_REGULATION_OF_MITOPHAGY	VPS13D	ENSG00000048707
1933	C5	GO:BP	GOBP_REGULATION_OF_XENOPHAGY	LRSAM1	ENSG00000148356
1934	C5	GO:BP	GOBP_REGULATION_OF_XENOPHAGY	MAPK3	ENSG00000102882
1935	C5	GO:BP	GOBP_REGULATION_OF_XENOPHAGY	NOD1	ENSG00000106100
1936	C5	GO:BP	GOBP_REGULATION_OF_XENOPHAGY	NOD2	ENSG00000167207
1937	C5	GO:BP	GOBP_REGULATION_OF_XENOPHAGY	OPTN	ENSG00000123240
1938	C5	GO:BP	GOBP_REGULATION_OF_XENOPHAGY	RIPK2	ENSG00000104312
1939	C5	GO:BP	GOBP_REGULATION_OF_XENOPHAGY	RNF31	ENSG00000092098
1940	C5	GO:BP	GOBP_REGULATION_OF_XENOPHAGY	RNF31	ENSG00000285152
1941	C5	GO:BP	GOBP_REGULATION_OF_XENOPHAGY	TBK1	ENSG00000183735
1942	C5	GO:BP	GOBP_RETICULOPHAGY	ATG2A	ENSG00000110046
1943	C5	GO:BP	GOBP_RETICULOPHAGY	ATG2B	ENSG00000066739
1944	C5	GO:BP	GOBP_RETICULOPHAGY	DDRGK1	ENSG00000198171
1945	C5	GO:BP	GOBP_RETICULOPHAGY	RB1CC1	ENSG00000023287
1946	C5	GO:BP	GOBP_RETICULOPHAGY	RETREG1	ENSG00000154153
1947	C5	GO:BP	GOBP_RETICULOPHAGY	RETREG3	ENSG00000141699
1948	C5	GO:BP	GOBP_RETICULOPHAGY	STING1	ENSG00000184584
1949	C5	GO:BP	GOBP_RETICULOPHAGY	STING1	ENSG00000288243
1950	C5	GO:BP	GOBP_RETICULOPHAGY	TEX264	ENSG00000164081
1951	C5	GO:BP	GOBP_RETICULOPHAGY	UBA5	ENSG00000081307
1952	C5	GO:BP	GOBP_RETICULOPHAGY	UFC1	ENSG00000143222
1953	C5	GO:BP	GOBP_RETICULOPHAGY	UFL1	ENSG00000014123
1954	C5	GO:BP	GOBP_RETICULOPHAGY	UFM1	ENSG00000120686
1955	C5	GO:BP	GOBP_RETICULOPHAGY	ULK1	ENSG00000177169
1956	C5	GO:BP	GOBP_RETICULOPHAGY	ULK2	ENSG00000083290
1957	C5	GO:BP	GOBP_SELECTIVE_AUTOPHAGY	ACBD5	ENSG00000107897
1958	C5	GO:BP	GOBP_SELECTIVE_AUTOPHAGY	ADRB2	ENSG00000169252
1959	C5	GO:BP	GOBP_SELECTIVE_AUTOPHAGY	AMBRA1	ENSG00000110497
1960	C5	GO:BP	GOBP_SELECTIVE_AUTOPHAGY	ARFIP2	ENSG00000132254
1961	C5	GO:BP	GOBP_SELECTIVE_AUTOPHAGY	ATG13	ENSG00000175224
1962	C5	GO:BP	GOBP_SELECTIVE_AUTOPHAGY	ATG14	ENSG00000126775
1963	C5	GO:BP	GOBP_SELECTIVE_AUTOPHAGY	ATG16L1	ENSG00000085978
1964	C5	GO:BP	GOBP_SELECTIVE_AUTOPHAGY	ATG16L1	ENSG00000281089
1965	C5	GO:BP	GOBP_SELECTIVE_AUTOPHAGY	ATG2A	ENSG00000110046
1966	C5	GO:BP	GOBP_SELECTIVE_AUTOPHAGY	ATG2B	ENSG00000066739
1967	C5	GO:BP	GOBP_SELECTIVE_AUTOPHAGY	ATG4B	ENSG00000168397
1968	C5	GO:BP	GOBP_SELECTIVE_AUTOPHAGY	ATG4D	ENSG00000130734
1969	C5	GO:BP	GOBP_SELECTIVE_AUTOPHAGY	ATG5	ENSG00000057663
1970	C5	GO:BP	GOBP_SELECTIVE_AUTOPHAGY	AUP1	ENSG00000115307
1971	C5	GO:BP	GOBP_SELECTIVE_AUTOPHAGY	BAG3	ENSG00000151929
1972	C5	GO:BP	GOBP_SELECTIVE_AUTOPHAGY	BECN1	ENSG00000126581
1973	C5	GO:BP	GOBP_SELECTIVE_AUTOPHAGY	C5orf51	ENSG00000205765
1974	C5	GO:BP	GOBP_SELECTIVE_AUTOPHAGY	CALCOCO2	ENSG00000136436
1975	C5	GO:BP	GOBP_SELECTIVE_AUTOPHAGY	CDC37	ENSG00000105401
1976	C5	GO:BP	GOBP_SELECTIVE_AUTOPHAGY	CERS1	ENSG00000223802
1977	C5	GO:BP	GOBP_SELECTIVE_AUTOPHAGY	DDRGK1	ENSG00000198171
1978	C5	GO:BP	GOBP_SELECTIVE_AUTOPHAGY	HDAC6	ENSG00000094631
1979	C5	GO:BP	GOBP_SELECTIVE_AUTOPHAGY	HSPB8	ENSG00000152137
1980	C5	GO:BP	GOBP_SELECTIVE_AUTOPHAGY	HTRA2	ENSG00000115317
1981	C5	GO:BP	GOBP_SELECTIVE_AUTOPHAGY	HTT	ENSG00000197386
1982	C5	GO:BP	GOBP_SELECTIVE_AUTOPHAGY	HUWE1	ENSG00000086758
1983	C5	GO:BP	GOBP_SELECTIVE_AUTOPHAGY	KLHL3	ENSG00000146021
1984	C5	GO:BP	GOBP_SELECTIVE_AUTOPHAGY	LGALS8	ENSG00000116977
1985	C5	GO:BP	GOBP_SELECTIVE_AUTOPHAGY	LRBA	ENSG00000198589
1986	C5	GO:BP	GOBP_SELECTIVE_AUTOPHAGY	LRSAM1	ENSG00000148356
1987	C5	GO:BP	GOBP_SELECTIVE_AUTOPHAGY	MAP1LC3B	ENSG00000140941
1988	C5	GO:BP	GOBP_SELECTIVE_AUTOPHAGY	MAP1LC3C	ENSG00000197769
1989	C5	GO:BP	GOBP_SELECTIVE_AUTOPHAGY	MAPK3	ENSG00000102882
1990	C5	GO:BP	GOBP_SELECTIVE_AUTOPHAGY	MFN2	ENSG00000116688
1991	C5	GO:BP	GOBP_SELECTIVE_AUTOPHAGY	NOD1	ENSG00000106100
1992	C5	GO:BP	GOBP_SELECTIVE_AUTOPHAGY	NOD2	ENSG00000167207
1993	C5	GO:BP	GOBP_SELECTIVE_AUTOPHAGY	OPTN	ENSG00000123240
1994	C5	GO:BP	GOBP_SELECTIVE_AUTOPHAGY	PHB2	ENSG00000215021
1995	C5	GO:BP	GOBP_SELECTIVE_AUTOPHAGY	PINK1	ENSG00000158828
1996	C5	GO:BP	GOBP_SELECTIVE_AUTOPHAGY	PJVK	ENSG00000204311
1997	C5	GO:BP	GOBP_SELECTIVE_AUTOPHAGY	PRKN	ENSG00000185345
1998	C5	GO:BP	GOBP_SELECTIVE_AUTOPHAGY	RAB7A	ENSG00000075785
[truncated: 900 more rows]
